# Supplementary material for: Effects of Eribulin on the RNA Content of Extracellular Vesicles Released by Metastatic Breast Cancer Cells
Source: MDPI journal article supplement (doi:10.3390/cells13060479), 2024-03-08
Supplement: s1 [file s1]

# SUPPLEMENTARY MATERIAL for:

## Effects of Eribulin on the RNA Content of Extracellular Vesicles Released by Metastatic Breast Cancer Cells

by Giulietti M et al.

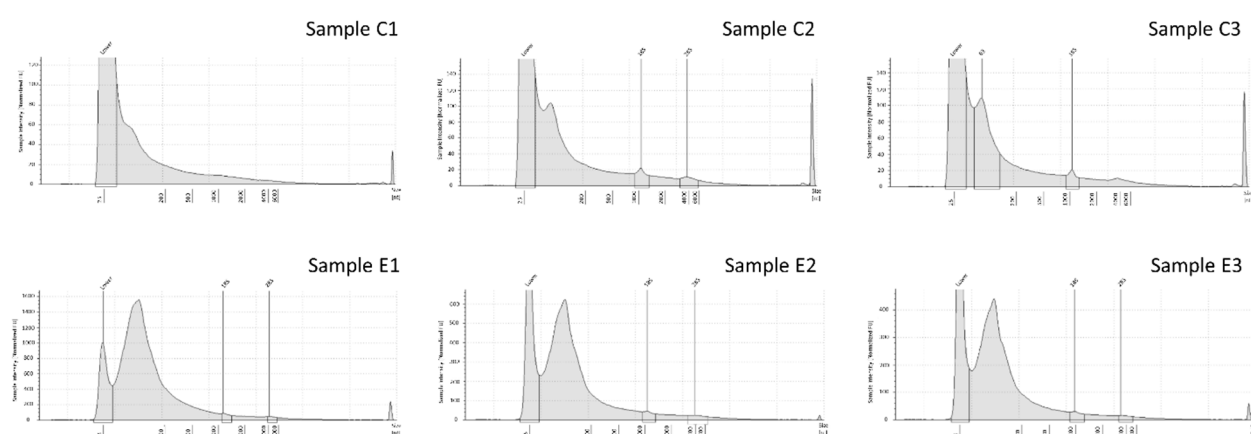

**Supplementary Figure S1.** Evaluation of the RNA quality in EVs from MDA-MB-231 (control samples: C1, C2, C3; eribulin-treatment: E1, E2, E3). Electrophoretic spectra of EV RNA obtained with RNA Nano 6000 Kit in an Agilent 2100 Bioanalyzer are shown. FU, fluorescence units; nt, nucleotides.

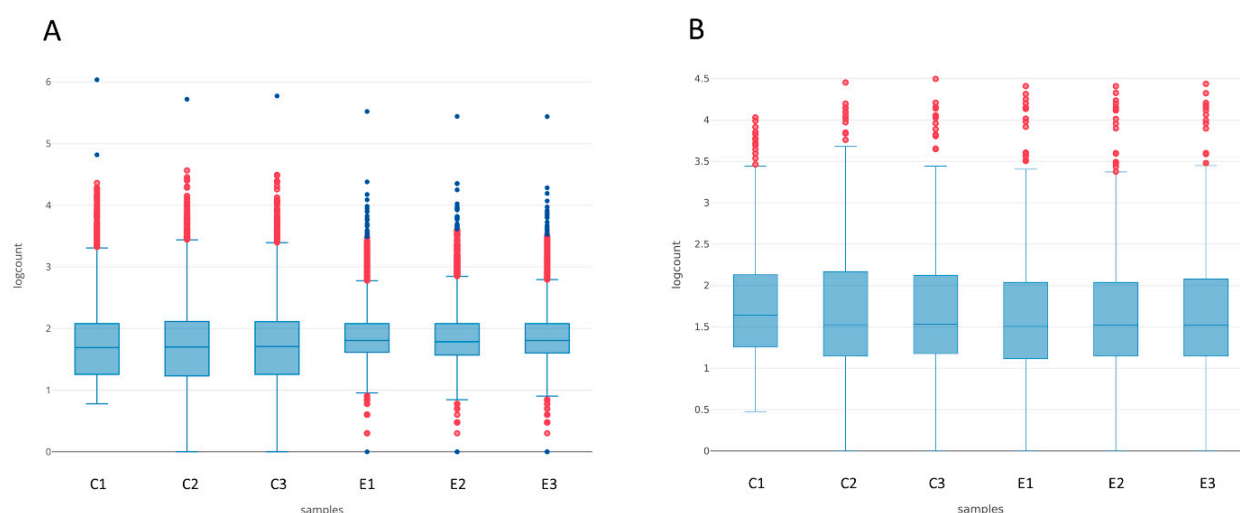

**Supplementary Figure S2:** Boxplots with normalized counts of long ncRNAs and mRNAs (A) and small RNAs (B). The count distribution and some statistics are represented in these plots. C1, C2, C3: biological replicates of EV RNAs from untreated cells. E1, E2, E3: biological replicates of EV RNAs from eribulin treated cells. Red and blue dots represent outliers.

**Supplementary Table S1.** Quantity of the isolated EV RNAs.

| Sample name | Sample volume (μl) | Concentration (ng/μl) | Total quantity (ng) |
|-------------|--------------------|-----------------------|---------------------|
| C1          | 40                 | 0.13                  | 2.50                |
| C2          | 40                 | 0.22                  | 4.36                |
| C3          | 40                 | 0.20                  | 4.08                |
| E1          | 40                 | 2.10                  | 42.00               |
| E2          | 40                 | 0.95                  | 19.06               |
| E3          | 40                 | 0.75                  | 14.94               |

**Supplementary Table S2.** Ranges of reads (minimum and maximum number of reads) for each sample. This information details the Supplementary Figure S2. Note that, as widely accepted we filtered out genes with an average number of read <10 across samples, therefore it is still possible to find genes with a minimum number of reads equal to 0 in some samples of this table.

| RNA-seq type      | Sample name | MIN number of reads, log10 |      | MAX number of reads, log10 |      |
|-------------------|-------------|----------------------------|------|----------------------------|------|
| Long RNA library  | C1          | 4                          | 0.6  | 1,158,511                  | 6.06 |
|                   | C2          | 0                          | n/a  | 626,945                    | 5.80 |
|                   | C3          | 0                          | n/a  | 681,428                    | 5.83 |
|                   | E1          | 0                          | n/a  | 286,185                    | 5.46 |
|                   | E2          | 0                          | n/a  | 244,751                    | 5.39 |
|                   | E3          | 0                          | n/a  | 236,733                    | 5.37 |
| Small RNA library | C1          | 3                          | 0.48 | 10,974                     | 4.04 |
|                   | C2          | 0                          | n/a  | 28,631                     | 4.46 |
|                   | C3          | 0                          | n/a  | 31,518                     | 4.50 |
|                   | E1          | 0                          | n/a  | 25,483                     | 4.41 |
|                   | E2          | 0                          | n/a  | 25,018                     | 4.40 |
|                   | E3          | 0                          | n/a  | 27,166                     | 4.43 |

**Supplementary Table S3.** Total number of reads (before and after normalization) in control and eribulin-treated groups, and in relation to the long and small libraries.

| RNA-seq type      | Sample type      | Total number of reads (raw count) | Total number of reads (after normalization) |
|-------------------|------------------|-----------------------------------|---------------------------------------------|
| Long RNA library  | Control          | 10,730,479                        | 9,404,380                                   |
|                   | Eribulin-treated | 9,802,108                         | 5,142,157                                   |
| Small RNA library | Control          | 758,456                           | 648,301                                     |
|                   | Eribulin-treated | 1,177,824                         | 715,850                                     |

**Supplementary Table S4. Full list of differentially expressed long RNAs (i.e. mainly mRNAs and lncRNAs).** The table shows gene name, gene type, amount of differential expression in terms of logarithm of the base 2 of the Fold change (log<sub>2</sub>FC), adjusted P-value.

| Name          | Biotype                            | adjusted p-value | log <sub>2</sub> (FoldChange) |
|---------------|------------------------------------|------------------|-------------------------------|
| AQP4-AS1      | lncRNA                             | 2.71E-08         | 7.593                         |
| AC002463.3    | lncRNA                             | 1.02E-07         | 7.390                         |
| GABRG3        | protein_coding                     | 1.31E-07         | 7.356                         |
| CASS4         | protein_coding                     | 4.00E-07         | 7.178                         |
| NEFM          | protein_coding                     | 2.53E-09         | 6.937                         |
| MLIP          | protein_coding                     | 4.40E-09         | 6.872                         |
| CALN1         | protein_coding                     | 5.66E-08         | 6.609                         |
| FER1L5        | protein_coding                     | 4.47E-08         | 6.591                         |
| OTOG          | protein_coding                     | 7.29E-08         | 6.545                         |
| CELF2-AS2     | lncRNA                             | 1.49E-07         | 6.446                         |
| ATP10B        | protein_coding                     | 1.63E-09         | 6.388                         |
| RP11-799021.2 | lncRNA                             | 2.70E-07         | 6.373                         |
| FAM83F        | protein_coding                     | 2.54E-07         | 6.362                         |
| TDRD12        | protein_coding                     | 2.82E-07         | 6.357                         |
| RP4-715N11.2  | lncRNA                             | 3.15E-07         | 6.348                         |
| POU2F3        | protein_coding                     | 3.02E-07         | 6.347                         |
| GRM8          | protein_coding                     | 3.00E-09         | 6.340                         |
| NID2          | protein_coding                     | 3.84E-07         | 6.326                         |
| LINC02822     | lncRNA                             | 4.40E-07         | 6.325                         |
| MMP16         | protein_coding                     | 3.76E-07         | 6.321                         |
| FRMPD1        | protein_coding                     | 4.79E-07         | 6.297                         |
| AGBL4         | protein_coding                     | 1.57E-08         | 6.165                         |
| ITPRID1       | protein_coding                     | 2.08E-10         | 6.160                         |
| CNTN5         | protein_coding                     | 1.98E-10         | 6.137                         |
| CFAP74        | protein_coding                     | 3.74E-08         | 6.129                         |
| SLC30A10      | protein_coding                     | 3.87E-08         | 6.048                         |
| KSR2          | protein_coding                     | 1.93E-11         | 6.035                         |
| SLIT3         | protein_coding                     | 2.70E-11         | 6.021                         |
| RP11-622011.6 | lncRNA                             | 8.46E-08         | 5.986                         |
| RP11-191L9.4  | lncRNA                             | 1.90E-14         | 5.985                         |
| RNA5-8SN3     | rRNA                               | 9.80E-09         | 5.970                         |
| JAML          | protein_coding                     | 2.38E-09         | 5.968                         |
| SOX5          | protein_coding                     | 1.25E-07         | 5.918                         |
| TCP10L3       | transcribed_unprocessed_pseudogene | 3.22E-07         | 5.886                         |
| RP11-400D2.2  | lncRNA                             | 9.50E-09         | 5.864                         |
| GOLGA6L22     | protein_coding                     | 9.12E-09         | 5.863                         |
| OPRD1         | protein_coding                     | 2.61E-07         | 5.861                         |

|                 |                |          |       |
|-----------------|----------------|----------|-------|
| LINC00687       | lncRNA         | 3.49E-07 | 5.836 |
| LINC02669       | lncRNA         | 3.49E-07 | 5.827 |
| LINC01902       | lncRNA         | 1.22E-08 | 5.826 |
| ACTN2           | protein_coding | 1.51E-10 | 5.823 |
| FAM177B         | protein_coding | 4.55E-07 | 5.790 |
| SCN1A           | protein_coding | 9.50E-09 | 5.786 |
| SDK2            | protein_coding | 3.60E-11 | 5.760 |
| GRIK3           | protein_coding | 7.77E-06 | 5.738 |
| RP11-1396O13.23 |                | 9.70E-07 | 5.729 |
| SLC22A23        | protein_coding | 2.09E-08 | 5.713 |
| CSMD2           | protein_coding | 3.42E-19 | 5.712 |
| GRIA4           | protein_coding | 2.11E-09 | 5.698 |
| RP4-671O14.7    |                | 2.37E-09 | 5.680 |
| LINC02397       | lncRNA         | 2.70E-09 | 5.677 |
| CNTNAP5         | protein_coding | 1.22E-09 | 5.663 |
| LINC01122       | lncRNA         | 1.90E-11 | 5.655 |
| HNF4A           | protein_coding | 2.86E-11 | 5.651 |
| MYO18B          | protein_coding | 4.26E-09 | 5.640 |
| RGS22           | protein_coding | 1.14E-07 | 5.632 |
| LARGE1          | protein_coding | 8.02E-08 | 5.625 |
| RNA5-8SN1       | rRNA           | 5.02E-09 | 5.616 |
| LINC02208       | lncRNA         | 2.26E-09 | 5.612 |
| PALMD           | protein_coding | 6.98E-08 | 5.600 |
| ATP13A4         | protein_coding | 2.70E-09 | 5.595 |
| RP11-794P6.1    |                | 1.75E-07 | 5.562 |
| ADCY1           | protein_coding | 2.08E-07 | 5.550 |
| SLC26A8         | protein_coding | 2.36E-07 | 5.549 |
| RUNX1T1         | protein_coding | 2.05E-11 | 5.543 |
| RP11-161I6.2    |                | 5.50E-09 | 5.541 |
| RP11-752L20.3   |                | 1.47E-08 | 5.532 |
| RNF157          | protein_coding | 1.65E-06 | 5.527 |
| KCNT1           | protein_coding | 2.03E-07 | 5.525 |
| CAGE1           | protein_coding | 1.19E-07 | 5.525 |
| SILC1           | lncRNA         | 7.91E-12 | 5.520 |
| MUC12           | protein_coding | 4.20E-24 | 5.518 |
| MYOM1           | protein_coding | 1.03E-08 | 5.516 |
| NTM             | protein_coding | 1.05E-08 | 5.485 |
| RP11-369E15.3   |                | 3.03E-08 | 5.483 |
| MACROH2A2       | protein_coding | 2.19E-09 | 5.483 |
| MIR7515HG       | lncRNA         | 4.02E-08 | 5.477 |
| LINC00877       | lncRNA         | 5.04E-08 | 5.450 |
| KCNJ16          | protein_coding | 5.42E-07 | 5.443 |
| RNA5S2          | rRNA           | 8.12E-07 | 5.438 |
| HEPHL1          | protein_coding | 9.89E-07 | 5.437 |
| GRIN2A          | protein_coding | 3.56E-08 | 5.436 |
| RP4-737E23.7    |                | 2.93E-08 | 5.424 |

|              |                                    |           |       |
|--------------|------------------------------------|-----------|-------|
| RP1          | protein_coding                     | 1.85E-08  | 5.418 |
| ASXL3        | protein_coding                     | 6.99E-08  | 5.417 |
| BPIFB1       | protein_coding                     | 5.90E-08  | 5.410 |
| LINC00971    | lncRNA                             | 2.12E-08  | 5.408 |
| CTNND2       | protein_coding                     | 3.87E-08  | 5.402 |
| SULF1        | protein_coding                     | 1.04E-07  | 5.381 |
| ITIH2        | protein_coding                     | 7.77E-07  | 5.373 |
| CSMD1        | protein_coding                     | 1.55E-10  | 5.335 |
| ADD2         | protein_coding                     | 2.38E-08  | 5.326 |
| ZAN          | protein_coding                     | 6.60E-09  | 5.321 |
| LINC00598    | lncRNA                             | 0.0044332 | 5.313 |
| ABCB1        | protein_coding                     | 2.08E-07  | 5.301 |
| SOX2-OT      | lncRNA                             | 2.55E-17  | 5.281 |
| AMPH         | protein_coding                     | 1.49E-05  | 5.272 |
| DPP6         | protein_coding                     | 1.76E-10  | 5.268 |
| PLCB1        | protein_coding                     | 2.29E-11  | 5.264 |
| LINC01255    | lncRNA                             | 5.51E-08  | 5.260 |
| TNN          | protein_coding                     | 4.55E-07  | 5.260 |
| ADAMTSL3     | protein_coding                     | 1.27E-07  | 5.257 |
| MXRA5        | protein_coding                     | 6.47E-10  | 5.252 |
| DAAM2-AS1    | lncRNA                             | 8.02E-13  | 5.250 |
| CLCN1        | protein_coding                     | 4.41E-07  | 5.242 |
| RP11-81F8.1  |                                    | 5.60E-10  | 5.241 |
| LINC01151    | lncRNA                             | 2.69E-09  | 5.239 |
| DSCAML1      | protein_coding                     | 1.29E-08  | 5.235 |
| AC097467.2   |                                    | 5.19E-08  | 5.232 |
| C2orf16      | protein_coding                     | 1.49E-09  | 5.219 |
| CDH26        | protein_coding                     | 2.82E-07  | 5.217 |
| SSUH2        | protein_coding                     | 5.27E-07  | 5.214 |
| NFASC        | protein_coding                     | 9.43E-14  | 5.212 |
| RPH3A        | protein_coding                     | 5.30E-11  | 5.205 |
| MROH9        | protein_coding                     | 2.65E-08  | 5.200 |
| PHACTR3      | protein_coding                     | 1.22E-07  | 5.198 |
| SORCS1       | protein_coding                     | 8.59E-08  | 5.197 |
| COL6A5       | protein_coding                     | 6.70E-07  | 5.184 |
| LINC00958    | lncRNA                             | 7.25E-07  | 5.182 |
| NCAM1        | protein_coding                     | 3.75E-08  | 5.178 |
| RP11-259O2.1 |                                    | 6.99E-08  | 5.174 |
| CHGB         | protein_coding                     | 1.05E-08  | 5.170 |
| MDGA2        | protein_coding                     | 3.33E-09  | 5.153 |
| PCDH10       | protein_coding                     | 4.30E-07  | 5.148 |
| SLC24A4      | protein_coding                     | 3.61E-10  | 5.146 |
| IGF1         | protein_coding                     | 1.46E-07  | 5.145 |
| MYH1         | protein_coding                     | 4.71E-08  | 5.144 |
| ALOX12P2     | transcribed_unprocessed_pseudogene | 4.96E-07  | 5.143 |
| AC079807.4   |                                    | 5.38E-08  | 5.142 |

|              |                                    |          |       |
|--------------|------------------------------------|----------|-------|
| ABCA12       | protein_coding                     | 3.89E-08 | 5.140 |
| ZBTB16       | protein_coding                     | 1.55E-12 | 5.135 |
| MYBPC3       | protein_coding                     | 1.38E-06 | 5.130 |
| LINC01828    | lncRNA                             | 1.24E-06 | 5.128 |
| FGFR2        | protein_coding                     | 1.15E-09 | 5.126 |
| FAM153CP     | lncRNA                             | 2.56E-10 | 5.126 |
| HMCN1        | protein_coding                     | 7.17E-13 | 5.124 |
| MYBPC1       | protein_coding                     | 7.34E-08 | 5.119 |
| RPTN         | protein_coding                     | 1.32E-06 | 5.117 |
| SGK2         | protein_coding                     | 5.43E-07 | 5.114 |
| A2ML1        | protein_coding                     | 1.90E-06 | 5.113 |
| TFAP2B       | protein_coding                     | 8.92E-08 | 5.103 |
| CACNA2D3     | protein_coding                     | 2.68E-07 | 5.102 |
| ATP1A2       | protein_coding                     | 3.01E-07 | 5.089 |
| LRR6         | protein_coding                     | 2.35E-06 | 5.083 |
| TMEM178B     | protein_coding                     | 7.24E-08 | 5.083 |
| A2M          | protein_coding                     | 5.94E-08 | 5.076 |
| EPHA7        | protein_coding                     | 6.97E-07 | 5.068 |
| TCHHL1       | protein_coding                     | 2.36E-06 | 5.063 |
| CDH6         | protein_coding                     | 2.01E-08 | 5.057 |
| SORCS3       | protein_coding                     | 1.16E-06 | 5.051 |
| CD101        | protein_coding                     | 1.20E-06 | 5.051 |
| ERICH3-AS1   | lncRNA                             | 6.11E-07 | 5.044 |
| RBFOX1       | protein_coding                     | 1.65E-07 | 5.036 |
| STMND1       | protein_coding                     | 1.31E-05 | 5.035 |
| RP11-491F9.1 |                                    | 1.80E-08 | 5.034 |
| SYT9         | protein_coding                     | 3.24E-06 | 5.032 |
| IL10RA       | protein_coding                     | 1.17E-08 | 5.032 |
| KIF25        | protein_coding                     | 1.62E-06 | 5.030 |
| WSCD2        | protein_coding                     | 6.67E-07 | 5.025 |
| SSPOP        | transcribed_unitary_pseudogene     | 2.45E-10 | 5.019 |
| WDFY4        | protein_coding                     | 5.00E-13 | 5.018 |
| LINC01622    | lncRNA                             | 6.99E-07 | 5.016 |
| LINC01498    | lncRNA                             | 3.33E-07 | 5.012 |
| LINC00343    | lncRNA                             | 6.39E-07 | 5.011 |
| HYDIN2       | transcribed_unprocessed_pseudogene | 1.20E-13 | 5.002 |
| DCDC2        | protein_coding                     | 3.33E-07 | 5.001 |
| MACROD2      | protein_coding                     | 2.77E-07 | 4.995 |
| LINC01287    | lncRNA                             | 2.25E-09 | 4.995 |
| MARCHF1      | protein_coding                     | 2.65E-07 | 4.992 |
| CNKSR2       | protein_coding                     | 9.82E-05 | 4.984 |
| ENTPD1       | protein_coding                     | 5.69E-06 | 4.981 |
| CTD-3088G3.8 |                                    | 9.32E-07 | 4.975 |
| LINC01358    | lncRNA                             | 8.24E-09 | 4.971 |
| DNAH10       | protein_coding                     | 1.03E-06 | 4.966 |
| BNIP5        | protein_coding                     | 6.85E-08 | 4.964 |

|               |                      |          |       |
|---------------|----------------------|----------|-------|
| SFMBT2        | protein_coding       | 2.81E-06 | 4.961 |
| IL12A-AS1     | lncRNA               | 1.61E-06 | 4.953 |
| KCNA2         | protein_coding       | 3.40E-11 | 4.950 |
| STEAP4        | protein_coding       | 3.09E-07 | 4.948 |
| LY9           | protein_coding       | 1.40E-06 | 4.944 |
| RP11-419I17.1 |                      | 2.91E-07 | 4.942 |
| RIPOR2        | protein_coding       | 8.39E-09 | 4.936 |
| ECM2          | protein_coding       | 3.49E-07 | 4.933 |
| AL591893.1    |                      | 1.02E-07 | 4.929 |
| SYCP2         | protein_coding       | 3.76E-09 | 4.928 |
| BASP1-AS1     | lncRNA               | 5.71E-13 | 4.925 |
| KIAA0319      | protein_coding       | 6.36E-09 | 4.922 |
| RP11-281A20.2 |                      | 5.02E-09 | 4.919 |
| GHR           | protein_coding       | 9.81E-08 | 4.916 |
| RP11-147G16.1 |                      | 4.67E-08 | 4.898 |
| ZNF667        | protein_coding       | 3.71E-08 | 4.897 |
| CFAP57        | protein_coding       | 2.07E-06 | 4.896 |
| C4orf50       | protein_coding       | 3.18E-08 | 4.895 |
| LSAMP         | protein_coding       | 2.60E-06 | 4.890 |
| LINC02702     | lncRNA               | 3.21E-06 | 4.885 |
| SNAP25-AS1    | lncRNA               | 1.82E-07 | 4.885 |
| MEF2C-AS1     | lncRNA               | 2.02E-07 | 4.882 |
| OPRM1         | protein_coding       | 1.71E-09 | 4.876 |
| RP11-373N22.3 |                      | 2.97E-10 | 4.875 |
| CTD-2314G24.2 |                      | 3.00E-06 | 4.868 |
| NID1          | protein_coding       | 1.48E-06 | 4.868 |
| DCN           | protein_coding       | 5.24E-06 | 4.866 |
| CTNNA3        | protein_coding       | 5.95E-09 | 4.866 |
| PRKN          | protein_coding       | 6.62E-07 | 4.861 |
| ACSM2B        | protein_coding       | 5.61E-11 | 4.859 |
| MEGF10        | protein_coding       | 4.14E-06 | 4.857 |
| UNC80         | protein_coding       | 1.66E-09 | 4.855 |
| LINC01206     | lncRNA               | 1.06E-09 | 4.851 |
| DGKG          | protein_coding       | 2.10E-09 | 4.850 |
| CNTNAP2       | protein_coding       | 2.81E-08 | 4.847 |
| LCT           | protein_coding       | 4.68E-05 | 4.845 |
| KC6           | lncRNA               | 2.58E-07 | 4.843 |
| IGSF22        | protein_coding       | 6.45E-06 | 4.843 |
| PTPRT         | protein_coding       | 3.68E-09 | 4.842 |
| LINC01814     | lncRNA               | 3.94E-07 | 4.841 |
| RGSL1         | protein_coding       | 6.46E-09 | 4.828 |
| OTOF          | protein_coding       | 1.12E-06 | 4.828 |
| NPM1P51       | processed_pseudogene | 4.66E-06 | 4.826 |
| LINC02073     | lncRNA               | 9.10E-07 | 4.822 |
| ALK           | protein_coding       | 1.81E-06 | 4.807 |
| PAMR1         | protein_coding       | 5.41E-06 | 4.799 |

|                |                |           |       |
|----------------|----------------|-----------|-------|
| LINC00923      | lncRNA         | 1.51E-07  | 4.796 |
| LINC02055      | lncRNA         | 0.011642  | 4.790 |
| RP3-468B3.2    |                | 3.51E-13  | 4.788 |
| PNLIPRP1       | protein_coding | 2.68E-07  | 4.786 |
| MUC16          | protein_coding | 0.0001249 | 4.783 |
| ADGRF2         | protein_coding | 6.90E-06  | 4.781 |
| MYT1L          | protein_coding | 0.0113118 | 4.767 |
| SLC5A9         | protein_coding | 1.73E-06  | 4.764 |
| AF064858.6     |                | 2.34E-06  | 4.756 |
| GLB1L3         | protein_coding | 1.20E-05  | 4.749 |
| TG             | protein_coding | 3.72E-10  | 4.749 |
| MCF2L2         | protein_coding | 1.33E-11  | 4.746 |
| GRIA2          | protein_coding | 2.77E-07  | 4.744 |
| OR56A1         | protein_coding | 2.38E-07  | 4.742 |
| COL19A1        | protein_coding | 0.0078832 | 4.734 |
| SLA            | protein_coding | 2.81E-05  | 4.727 |
| PRDM9          | protein_coding | 6.65E-09  | 4.726 |
| VWA5B1         | protein_coding | 4.42E-06  | 4.724 |
| COL6A6         | protein_coding | 3.60E-07  | 4.720 |
| SPTBN4         | protein_coding | 8.24E-08  | 4.719 |
| RP11-527D7.1   |                | 9.24E-06  | 4.718 |
| STEAP1B        | protein_coding | 1.13E-07  | 4.711 |
| STAB2          | protein_coding | 5.09E-08  | 4.701 |
| GFRA1          | protein_coding | 5.83E-07  | 4.693 |
| SLCO2B1        | protein_coding | 1.22E-08  | 4.692 |
| RP11-1023L17.2 |                | 1.40E-10  | 4.691 |
| LINC00534      | lncRNA         | 6.78E-12  | 4.687 |
| RP5-921G16.1   |                | 2.82E-11  | 4.686 |
| L3MBTL1        | protein_coding | 3.87E-07  | 4.684 |
| FGD5           | protein_coding | 2.12E-07  | 4.682 |
| LRRC7          | protein_coding | 0.0074287 | 4.671 |
| GADL1          | protein_coding | 5.12E-06  | 4.670 |
| DSCAM          | protein_coding | 2.37E-07  | 4.669 |
| TMPRSS4        | protein_coding | 2.68E-07  | 4.665 |
| FLJ16779       | lncRNA         | 2.13E-07  | 4.665 |
| RP5-1120P11.3  |                | 1.96E-14  | 4.665 |
| DAAM2          | protein_coding | 1.02E-17  | 4.663 |
| NOL4           | protein_coding | 2.19E-06  | 4.662 |
| NRAP           | protein_coding | 7.57E-07  | 4.661 |
| FAM135B        | protein_coding | 3.80E-08  | 4.660 |
| PKN2-AS1       | lncRNA         | 6.26E-09  | 4.660 |
| ENPEP          | protein_coding | 1.51E-08  | 4.654 |
| LINC01811      | lncRNA         | 3.13E-08  | 4.649 |
| PCK1           | protein_coding | 2.86E-06  | 4.645 |
| GUCY1A1        | protein_coding | 1.13E-06  | 4.642 |
| CCDC26         | lncRNA         | 4.10E-05  | 4.641 |



|               |                |           |       |
|---------------|----------------|-----------|-------|
| UNC5C         | protein_coding | 1.66E-07  | 4.641 |
| LINC01934     | lncRNA         | 1.86E-07  | 4.641 |
| LDLRAD4       | protein_coding | 3.69E-15  | 4.641 |
| RIMS2         | protein_coding | 3.80E-11  | 4.636 |
| PTPRO         | protein_coding | 9.91E-07  | 4.631 |
| MCF2L         | protein_coding | 5.82E-08  | 4.629 |
| LINC02532     | lncRNA         | 1.62E-06  | 4.628 |
| PROX1-AS1     | lncRNA         | 1.26E-08  | 4.627 |
| LINC01630     | lncRNA         | 2.70E-07  | 4.626 |
| STYXL2        | protein_coding | 3.18E-05  | 4.621 |
| LINC01435     | lncRNA         | 4.99E-07  | 4.620 |
| PCSK6         | protein_coding | 2.96E-06  | 4.620 |
| PPP2R2B       | protein_coding | 4.80E-07  | 4.620 |
| FER1L6        | protein_coding | 1.46E-08  | 4.617 |
| SETBP1        | protein_coding | 3.56E-11  | 4.616 |
| SLC6A1        | protein_coding | 8.59E-08  | 4.614 |
| DNAH6         | protein_coding | 0.0037211 | 4.611 |
| RP11-109I13.2 |                | 1.90E-06  | 4.608 |
| LLNLF-96A1.1  |                | 4.12E-18  | 4.606 |
| KCNB1         | protein_coding | 4.78E-12  | 4.602 |
| SCN8A         | protein_coding | 1.04E-09  | 4.601 |
| COL14A1       | protein_coding | 9.45E-09  | 4.601 |
| DCHS2         | protein_coding | 8.65E-08  | 4.600 |
| MAPK10        | protein_coding | 1.81E-15  | 4.600 |
| ADGB          | protein_coding | 6.88E-05  | 4.599 |
| LINC01837     | lncRNA         | 4.22E-06  | 4.595 |
| GPNMB         | protein_coding | 4.81E-06  | 4.594 |
| RP11-90C4.1   |                | 1.29E-06  | 4.594 |
| ANKS1B        | protein_coding | 2.61E-11  | 4.592 |
| TRPC6         | protein_coding | 4.24E-06  | 4.591 |
| KCNJ6         | protein_coding | 2.65E-08  | 4.590 |
| MSC-AS1       | lncRNA         | 9.00E-08  | 4.590 |
| ANO1          | protein_coding | 2.10E-06  | 4.587 |
| CASC15        | lncRNA         | 0.0001361 | 4.586 |
| WDR64         | protein_coding | 4.71E-07  | 4.584 |
| VASH2         | protein_coding | 2.90E-06  | 4.581 |
| FGD2          | protein_coding | 1.11E-09  | 4.581 |
| ABCC8         | protein_coding | 1.03E-10  | 4.576 |
| CADPS         | protein_coding | 0.007209  | 4.575 |
| NTNG1         | protein_coding | 2.02E-06  | 4.572 |
| ABCC2         | protein_coding | 8.14E-07  | 4.570 |
| TMC1          | protein_coding | 1.08E-10  | 4.569 |
| KCNC1         | protein_coding | 1.06E-07  | 4.567 |
| TTLL9         | protein_coding | 3.03E-05  | 4.565 |
| GRIN2B        | protein_coding | 1.04E-11  | 4.563 |
| TECTA         | protein_coding | 9.89E-06  | 4.562 |

|                |                                |           |       |
|----------------|--------------------------------|-----------|-------|
| TNR            | protein_coding                 | 2.59E-07  | 4.558 |
| CDH23          | protein_coding                 | 3.06E-09  | 4.558 |
| PDZRN3         | protein_coding                 | 3.24E-06  | 4.556 |
| CHRNA4         | protein_coding                 | 2.58E-06  | 4.554 |
| PWRN1          | lncRNA                         | 0.0038042 | 4.551 |
| GABRA2         | protein_coding                 | 7.77E-07  | 4.550 |
| LINC01725      | lncRNA                         | 6.44E-06  | 4.549 |
| DAB1           | protein_coding                 | 6.30E-06  | 4.547 |
| RP11-115J16.1  |                                | 1.77E-09  | 4.546 |
| HMCN2          | protein_coding                 | 0.0084095 | 4.545 |
| ABCA9          | protein_coding                 | 2.82E-07  | 4.545 |
| RP11-203H2.1   |                                | 5.76E-06  | 4.542 |
| LINC02552      | lncRNA                         | 6.47E-07  | 4.541 |
| EMX2OS         | lncRNA                         | 8.21E-06  | 4.539 |
| TRPM3          | protein_coding                 | 1.81E-12  | 4.535 |
| LGI1           | protein_coding                 | 3.71E-08  | 4.535 |
| RP11-573D15.8  |                                | 3.13E-07  | 4.530 |
| GDA            | protein_coding                 | 3.70E-07  | 4.527 |
| LRP1B          | protein_coding                 | 2.85E-10  | 4.525 |
| RP11-436D23.1  |                                | 2.00E-08  | 4.525 |
| ELAVL4         | protein_coding                 | 3.80E-05  | 4.524 |
| DLX6-AS1       | lncRNA                         | 1.51E-06  | 4.523 |
| SRRM4          | protein_coding                 | 6.85E-06  | 4.521 |
| RP11-159D12.12 |                                | 8.61E-06  | 4.520 |
| ABCB5          | protein_coding                 | 1.26E-06  | 4.518 |
| ITIH5          | protein_coding                 | 1.31E-07  | 4.516 |
| PTPRZ1         | protein_coding                 | 3.70E-07  | 4.514 |
| WNT2B          | protein_coding                 | 9.57E-07  | 4.511 |
| GPLD1          | protein_coding                 | 2.40E-07  | 4.511 |
| PCAT1          | lncRNA                         | 2.17E-11  | 4.510 |
| BMPER          | protein_coding                 | 2.65E-06  | 4.508 |
| ITGA4          | protein_coding                 | 9.95E-06  | 4.506 |
| CCDC162P       | transcribed_unitary_pseudogene | 4.62E-07  | 4.505 |
| ADCY2          | protein_coding                 | 4.24E-07  | 4.502 |
| CFAP47         | protein_coding                 | 8.16E-08  | 4.501 |
| USP6           | protein_coding                 | 1.29E-06  | 4.500 |
| THSD7A         | protein_coding                 | 9.55E-08  | 4.493 |
| TMEM132B       | protein_coding                 | 2.14E-07  | 4.488 |
| LINC00466      | lncRNA                         | 2.26E-05  | 4.480 |
| ADGRB3         | protein_coding                 | 1.50E-07  | 4.475 |
| CYP2E1         | protein_coding                 | 8.10E-10  | 4.473 |
| DMP1           | protein_coding                 | 1.39E-05  | 4.468 |
| SLC17A4        | protein_coding                 | 3.76E-08  | 4.468 |
| TSHZ2          | protein_coding                 | 2.47E-09  | 4.453 |
| LINC00907      | lncRNA                         | 5.43E-10  | 4.446 |
| LNC-LBCS       | lncRNA                         | 1.36E-13  | 4.446 |

|               |                                    |           |       |
|---------------|------------------------------------|-----------|-------|
| UNC13C        | protein_coding                     | 2.71E-06  | 4.445 |
| TRDN-AS1      | lncRNA                             | 1.84E-05  | 4.445 |
| TEX41         | lncRNA                             | 1.33E-11  | 4.441 |
| LINC01036     | lncRNA                             | 1.19E-05  | 4.441 |
| IQCA1L        | protein_coding                     | 1.91E-05  | 4.436 |
| ABCA10        | protein_coding                     | 4.22E-06  | 4.435 |
| THRB-AS1      | lncRNA                             | 7.77E-06  | 4.433 |
| EYA2          | protein_coding                     | 1.14E-06  | 4.433 |
| KCNN3         | protein_coding                     | 2.29E-08  | 4.430 |
| CYP3A5        | protein_coding                     | 1.67E-05  | 4.429 |
| TCF4          | protein_coding                     | 2.84E-12  | 4.426 |
| AC013463.2    |                                    | 2.66E-08  | 4.421 |
| BPI           | protein_coding                     | 2.54E-05  | 4.415 |
| SCN11A        | protein_coding                     | 1.52E-06  | 4.412 |
| RGS8          | protein_coding                     | 5.96E-08  | 4.408 |
| REXO1L1P      | transcribed_processed_pseudogene   | 6.57E-14  | 4.407 |
| MAP3K19       | protein_coding                     | 8.47E-09  | 4.401 |
| RP11-550I24.2 |                                    | 3.48E-05  | 4.400 |
| RP11-15B24.5  |                                    | 3.24E-06  | 4.394 |
| DOCK8         | protein_coding                     | 1.76E-09  | 4.393 |
| ERICH3        | protein_coding                     | 1.49E-07  | 4.390 |
| LINC02325     | lncRNA                             | 1.17E-05  | 4.389 |
| ZNF667-AS1    | lncRNA                             | 1.27E-05  | 4.388 |
| GRIP2         | protein_coding                     | 1.76E-06  | 4.387 |
| KIAA2012      | protein_coding                     | 9.31E-07  | 4.387 |
| GRM4          | protein_coding                     | 3.69E-07  | 4.385 |
| STX18-AS1     | lncRNA                             | 1.47E-09  | 4.384 |
| ADGRV1        | protein_coding                     | 1.99E-16  | 4.382 |
| ABCC13        | transcribed_unprocessed_pseudogene | 8.02E-06  | 4.379 |
| PAH           | protein_coding                     | 6.84E-06  | 4.378 |
| RP11-822P4.2  |                                    | 4.66E-06  | 4.371 |
| CSRNP3        | protein_coding                     | 8.31E-06  | 4.367 |
| MYH7B         | protein_coding                     | 5.77E-06  | 4.366 |
| SLC12A5       | protein_coding                     | 7.81E-06  | 4.364 |
| DNAH8         | protein_coding                     | 0.0074799 | 4.360 |
| ANO3          | protein_coding                     | 2.01E-06  | 4.360 |
| ASTN1         | protein_coding                     | 7.70E-07  | 4.356 |
| RP11-702N8.3  |                                    | 0.0001255 | 4.355 |
| ATP8A2        | protein_coding                     | 1.94E-08  | 4.354 |
| U3            | snoRNA                             | 2.36E-07  | 4.353 |
| ABCA6         | protein_coding                     | 1.26E-07  | 4.353 |
| RP11-429A20.3 |                                    | 2.22E-06  | 4.351 |
| LINC01515     | lncRNA                             | 5.63E-07  | 4.348 |
| CDRT1         | protein_coding                     | 1.75E-05  | 4.346 |
| CORIN         | protein_coding                     | 5.32E-07  | 4.342 |
| GABRG2        | protein_coding                     | 3.06E-09  | 4.340 |

|                 |                                  |           |       |
|-----------------|----------------------------------|-----------|-------|
| LRP2            | protein_coding                   | 1.61E-10  | 4.338 |
| MEG8            | lncRNA                           | 2.96E-06  | 4.338 |
| AC079305.11     |                                  | 1.78E-05  | 4.330 |
| COPG2IT1        | lncRNA                           | 3.48E-11  | 4.329 |
| B3GAT1-DT       | lncRNA                           | 0.0001199 | 4.328 |
| SLC44A3-AS1     | transcribed_processed_pseudogene | 1.75E-06  | 4.326 |
| KIF1A           | protein_coding                   | 1.56E-06  | 4.323 |
| DNAH7           | protein_coding                   | 1.44E-08  | 4.320 |
| NCKAP1L         | protein_coding                   | 6.30E-06  | 4.318 |
| KIF5A           | protein_coding                   | 2.13E-06  | 4.318 |
| LINC02241       | lncRNA                           | 1.93E-07  | 4.317 |
| MYH8            | protein_coding                   | 6.56E-06  | 4.316 |
| ZNF793          | protein_coding                   | 0.0001533 | 4.313 |
| GPRIN3          | protein_coding                   | 4.45E-06  | 4.313 |
| RP11-381K20.2   |                                  | 1.39E-05  | 4.308 |
| CNTN4           | protein_coding                   | 0.0001145 | 4.308 |
| MYOCD           | protein_coding                   | 3.85E-06  | 4.306 |
| SCN7A           | protein_coding                   | 1.60E-06  | 4.306 |
| CACNB2          | protein_coding                   | 2.23E-06  | 4.305 |
| MIR3976HG       | lncRNA                           | 0.006873  | 4.305 |
| PHACTR1         | protein_coding                   | 2.36E-09  | 4.304 |
| CFAP61          | protein_coding                   | 3.15E-05  | 4.300 |
| NELL1           | protein_coding                   | 9.17E-06  | 4.288 |
| CACNA1S         | protein_coding                   | 4.97E-06  | 4.278 |
| GUCY1A2         | protein_coding                   | 1.90E-06  | 4.272 |
| FLT1            | protein_coding                   | 4.47E-05  | 4.270 |
| CHL1            | protein_coding                   | 1.16E-05  | 4.269 |
| PTCHD4          | protein_coding                   | 1.29E-10  | 4.269 |
| CHRM3           | protein_coding                   | 2.38E-07  | 4.267 |
| CTCF            | protein_coding                   | 3.73E-06  | 4.267 |
| C3              | protein_coding                   | 0.0001713 | 4.263 |
| LRRIQ1          | protein_coding                   | 2.42E-05  | 4.260 |
| MASP1           | protein_coding                   | 3.73E-06  | 4.260 |
| MROH2B          | protein_coding                   | 2.42E-05  | 4.254 |
| MYO3A           | protein_coding                   | 2.93E-07  | 4.252 |
| MYH4            | protein_coding                   | 2.93E-08  | 4.247 |
| CXXC4-AS1       | lncRNA                           | 1.40E-05  | 4.247 |
| IKZF3           | protein_coding                   | 5.89E-07  | 4.246 |
| XXyac-YR38GF2.1 |                                  | 5.28E-06  | 4.240 |
| CNTN2           | protein_coding                   | 1.61E-06  | 4.239 |
| ATP13A5         | protein_coding                   | 8.19E-06  | 4.239 |
| RP1-158P9.2     |                                  | 2.42E-05  | 4.236 |
| AC006115.7      |                                  | 7.06E-08  | 4.231 |
| ELN             | protein_coding                   | 3.93E-06  | 4.228 |
| TENM1           | protein_coding                   | 5.31E-05  | 4.227 |
| LINC01440       | lncRNA                           | 1.15E-05  | 4.221 |

|               |                        |           |       |
|---------------|------------------------|-----------|-------|
| LINC02607     | lncRNA                 | 3.28E-07  | 4.220 |
| CACNA1G       | protein_coding         | 5.29E-06  | 4.217 |
| PCA3          | lncRNA                 | 9.43E-08  | 4.216 |
| TENM2         | protein_coding         | 5.20E-06  | 4.215 |
| PKNOX2        | protein_coding         | 1.13E-07  | 4.208 |
| AC013460.1    |                        | 2.58E-06  | 4.207 |
| TDRD6         | protein_coding         | 9.71E-06  | 4.206 |
| ZNF385D       | protein_coding         | 1.03E-07  | 4.206 |
| LINC00461     | lncRNA                 | 3.64E-05  | 4.205 |
| SLC8A1-AS1    | lncRNA                 | 9.02E-07  | 4.204 |
| FCGR2A        | protein_coding         | 3.79E-06  | 4.204 |
| KY            | protein_coding         | 7.44E-05  | 4.198 |
| CACNA1D       | protein_coding         | 1.69E-09  | 4.197 |
| PLXNB1        | protein_coding         | 1.11E-05  | 4.196 |
| FYB1          | protein_coding         | 4.96E-08  | 4.195 |
| C6            | protein_coding         | 8.83E-07  | 4.194 |
| PCDH9         | protein_coding         | 3.03E-05  | 4.192 |
| CRX           | protein_coding         | 7.81E-06  | 4.191 |
| FMN2          | protein_coding         | 6.46E-09  | 4.187 |
| NOS1          | protein_coding         | 0.0222009 | 4.186 |
| LAMA4         | protein_coding         | 6.17E-06  | 4.185 |
| AP3B2         | protein_coding         | 9.75E-06  | 4.185 |
| MYH13         | protein_coding         | 5.97E-07  | 4.179 |
| F5            | protein_coding         | 0.0226237 | 4.176 |
| ANKRD11P1     | processed_pseudogene   | 3.42E-06  | 4.175 |
| RP11-111A21.1 |                        | 1.07E-05  | 4.171 |
| SPAG17        | protein_coding         | 2.34E-08  | 4.169 |
| SCN3A         | protein_coding         | 2.07E-05  | 4.167 |
| LINC00494     | lncRNA                 | 2.07E-05  | 4.163 |
| AKAP6         | protein_coding         | 1.28E-07  | 4.163 |
| NKAIN3        | protein_coding         | 3.32E-09  | 4.160 |
| A1CF          | protein_coding         | 1.03E-05  | 4.159 |
| SNHG14        | lncRNA                 | 2.71E-13  | 4.158 |
| LAMA1         | protein_coding         | 2.85E-08  | 4.157 |
| OTOGL         | protein_coding         | 5.44E-08  | 4.156 |
| ATP1A4        | protein_coding         | 7.53E-08  | 4.155 |
| TRIM9         | protein_coding         | 4.84E-06  | 4.152 |
| PKD1L2        | polymorphic_pseudogene | 2.04E-06  | 4.150 |
| DPP4          | protein_coding         | 2.13E-08  | 4.148 |
| RPGRIP1       | protein_coding         | 7.35E-05  | 4.147 |
| CCDC168       | protein_coding         | 5.90E-08  | 4.143 |
| CNTN6         | protein_coding         | 4.47E-05  | 4.140 |
| VIM2P         |                        | 1.17E-09  | 4.138 |
| CMYA5         | protein_coding         | 6.26E-08  | 4.137 |
| COL22A1       | protein_coding         | 2.87E-09  | 4.137 |
| MIR99AHG      | lncRNA                 | 1.48E-07  | 4.135 |

|               |                                    |           |       |
|---------------|------------------------------------|-----------|-------|
| MGAM          | protein_coding                     | 7.79E-05  | 4.134 |
| LINC01597     | lncRNA                             | 2.53E-06  | 4.133 |
| DPP10-AS1     | lncRNA                             | 1.18E-05  | 4.131 |
| LINC00342     | lncRNA                             | 2.07E-06  | 4.131 |
| CALML3-AS1    | lncRNA                             | 5.41E-06  | 4.130 |
| SOX6          | protein_coding                     | 1.30E-06  | 4.129 |
| SYN3          | protein_coding                     | 2.61E-05  | 4.129 |
| LINC01016     | lncRNA                             | 1.15E-05  | 4.127 |
| INHBA         | protein_coding                     | 7.37E-07  | 4.127 |
| RHPN2P1       | unprocessed_pseudogene             | 2.99E-05  | 4.126 |
| PAPPA2        | protein_coding                     | 2.85E-07  | 4.124 |
| SEMA3E        | protein_coding                     | 6.17E-07  | 4.122 |
| SYT14         | protein_coding                     | 1.46E-05  | 4.118 |
| BAGE2         | transcribed_unprocessed_pseudogene | 4.93E-06  | 4.118 |
| LINC01344     | lncRNA                             | 3.89E-05  | 4.112 |
| LINC00649     | lncRNA                             | 1.51E-05  | 4.112 |
| SLC14A2       | protein_coding                     | 0.0001616 | 4.111 |
| SAMMSON       | lncRNA                             | 1.12E-08  | 4.108 |
| TSIX          | lncRNA                             | 2.34E-08  | 4.108 |
| SEL1L3        | protein_coding                     | 3.29E-07  | 4.102 |
| TRHDE-AS1     | lncRNA                             | 9.11E-06  | 4.098 |
| HTR4          | protein_coding                     | 4.98E-05  | 4.096 |
| TREM1         | protein_coding                     | 4.23E-05  | 4.096 |
| RP11-329N11.1 |                                    | 6.07E-05  | 4.095 |
| RAB44         | protein_coding                     | 1.76E-05  | 4.093 |
| ANKRD31       | protein_coding                     | 2.35E-05  | 4.093 |
| COL5A3        | protein_coding                     | 9.05E-07  | 4.092 |
| MAGI2         | protein_coding                     | 1.03E-10  | 4.092 |
| FRMPD4        | protein_coding                     | 5.64E-06  | 4.088 |
| PALM3         | protein_coding                     | 2.34E-05  | 4.084 |
| STAG3         | protein_coding                     | 3.96E-05  | 4.083 |
| LINC00578     | lncRNA                             | 6.15E-05  | 4.081 |
| RP3-470L22.2  |                                    | 3.25E-05  | 4.078 |
| CADM1         | protein_coding                     | 7.51E-07  | 4.066 |
| OPN5          | protein_coding                     | 1.27E-05  | 4.062 |
| EYS           | protein_coding                     | 5.14E-08  | 4.059 |
| RP3-394A18.1  |                                    | 1.72E-08  | 4.058 |
| LYPLAL1-DT    | lncRNA                             | 9.66E-05  | 4.054 |
| LINC00499     | lncRNA                             | 0.0130633 | 4.054 |
| CACNA1E       | protein_coding                     | 2.44E-08  | 4.050 |
| RETREG1       | protein_coding                     | 2.96E-06  | 4.050 |
| ITGAL         | protein_coding                     | 5.29E-05  | 4.047 |
| CPB2-AS1      | lncRNA                             | 3.38E-05  | 4.046 |
| CDH12         | protein_coding                     | 3.83E-05  | 4.042 |
| IGSF9B        | protein_coding                     | 6.30E-11  | 4.039 |
| KCNK12        | protein_coding                     | 4.49E-05  | 4.039 |

|               |                      |           |       |
|---------------|----------------------|-----------|-------|
| ANK3          | protein_coding       | 6.69E-14  | 4.038 |
| FGF10         | protein_coding       | 1.66E-07  | 4.038 |
| EGFLAM        | protein_coding       | 2.46E-05  | 4.037 |
| RP4-681L3.3   |                      | 9.64E-05  | 4.035 |
| PDE3A         | protein_coding       | 9.50E-05  | 4.032 |
| FLJ40194      | lncRNA               | 1.97E-05  | 4.029 |
| CH507-513H4.3 |                      | 5.44E-07  | 4.029 |
| PDE11A        | protein_coding       | 5.63E-10  | 4.029 |
| TRIM66        | protein_coding       | 2.44E-07  | 4.027 |
| KLHL3         | protein_coding       | 2.37E-06  | 4.027 |
| GDNF-AS1      | lncRNA               | 1.18E-06  | 4.025 |
| ABCA4         | protein_coding       | 1.43E-06  | 4.024 |
| GOLGA6L2      | protein_coding       | 3.56E-08  | 4.024 |
| GABRA4        | protein_coding       | 0.000248  | 4.020 |
| LINC02465     | lncRNA               | 2.03E-06  | 4.019 |
| RP11-168K9.1  |                      | 0.014045  | 4.018 |
| ATP8B4        | protein_coding       | 3.67E-05  | 4.016 |
| AC011288.2    |                      | 3.49E-07  | 4.015 |
| PGBD5         | protein_coding       | 0.0001237 | 4.014 |
| ARHGAP28      | protein_coding       | 4.15E-10  | 4.014 |
| ITGA9         | protein_coding       | 2.23E-05  | 4.009 |
| MAP2K6        | protein_coding       | 6.20E-06  | 4.007 |
| CACNA1F       | protein_coding       | 7.57E-07  | 4.004 |
| RP11-427E2.1  |                      | 4.04E-05  | 4.003 |
| L3MBTL4       | protein_coding       | 3.15E-05  | 4.001 |
| GABRB2        | protein_coding       | 5.45E-05  | 4.000 |
| KCNJ15        | protein_coding       | 2.42E-05  | 3.998 |
| TRPV3         | protein_coding       | 2.61E-05  | 3.997 |
| PRRX1         | protein_coding       | 3.03E-06  | 3.994 |
| COL9A1        | protein_coding       | 4.32E-07  | 3.994 |
| LINC01088     | lncRNA               | 8.61E-06  | 3.985 |
| FAT2          | protein_coding       | 2.60E-07  | 3.982 |
| THBS2         | protein_coding       | 0.0001371 | 3.978 |
| RP1-223B1.1   |                      | 4.62E-13  | 3.978 |
| LINC01020     | lncRNA               | 9.55E-05  | 3.976 |
| ROBO2         | protein_coding       | 4.50E-08  | 3.974 |
| METAP2P1      | processed_pseudogene | 8.24E-06  | 3.973 |
| MIR29B2CHG    | lncRNA               | 3.70E-07  | 3.968 |
| SPTB          | protein_coding       | 2.82E-07  | 3.965 |
| ATP7B         | protein_coding       | 5.19E-06  | 3.963 |
| CTD-2516F10.2 |                      | 2.11E-06  | 3.961 |
| PDE3B         | protein_coding       | 3.69E-05  | 3.953 |
| HULC          | lncRNA               | 4.26E-05  | 3.952 |
| RP3-329A5.8   |                      | 5.95E-05  | 3.951 |
| CYP46A1       | protein_coding       | 2.78E-06  | 3.951 |
| RP11-510D4.1  |                      | 0.0001168 | 3.950 |

|             |                                    |           |       |
|-------------|------------------------------------|-----------|-------|
| RAPGEF5     | protein_coding                     | 2.82E-05  | 3.948 |
| SLC4A4      | protein_coding                     | 4.86E-07  | 3.945 |
| SLC13A3     | protein_coding                     | 1.75E-05  | 3.945 |
| MALRD1      | protein_coding                     | 2.06E-05  | 3.944 |
| GTF2IP13    | transcribed_unprocessed_pseudogene | 0.0002821 | 3.944 |
| SLC8A1      | protein_coding                     | 2.43E-07  | 3.943 |
| AC010091.1  |                                    | 7.60E-06  | 3.942 |
| LINC00299   | lncRNA                             | 0.0166884 | 3.942 |
| ABCA8       | protein_coding                     | 4.63E-05  | 3.940 |
| MYO7A       | protein_coding                     | 9.78E-07  | 3.938 |
| DNAH17      | protein_coding                     | 4.65E-10  | 3.937 |
| OFCC1       | transcribed_unitary_pseudogene     | 1.78E-07  | 3.934 |
| CD84        | protein_coding                     | 0.0002274 | 3.933 |
| EIF1B-AS1   | lncRNA                             | 5.22E-07  | 3.932 |
| IGFN1       | protein_coding                     | 1.25E-05  | 3.932 |
| PCDH15      | protein_coding                     | 1.11E-06  | 3.930 |
| CSMD3       | protein_coding                     | 3.72E-08  | 3.930 |
| FAT3        | protein_coding                     | 2.68E-11  | 3.928 |
| BTN2A3P     | transcribed_unprocessed_pseudogene | 4.30E-06  | 3.922 |
| FAM189A2    | protein_coding                     | 4.00E-05  | 3.920 |
| SVEP1       | protein_coding                     | 3.77E-06  | 3.918 |
| PRKCQ-AS1   | lncRNA                             | 3.31E-05  | 3.915 |
| LINC02008   | lncRNA                             | 0.0001347 | 3.914 |
| KCNQ3       | protein_coding                     | 5.83E-07  | 3.914 |
| LRP4        | protein_coding                     | 2.52E-08  | 3.910 |
| ADAMTS4     | protein_coding                     | 2.30E-05  | 3.909 |
| SCUBE3      | protein_coding                     | 1.16E-08  | 3.906 |
| DGKK        | protein_coding                     | 3.59E-05  | 3.901 |
| ACSM2A      | protein_coding                     | 7.90E-06  | 3.900 |
| C1S         | protein_coding                     | 5.01E-05  | 3.899 |
| AP000997.2  |                                    | 5.36E-05  | 3.895 |
| RASGRF2     | protein_coding                     | 4.00E-05  | 3.893 |
| ATP2B2      | protein_coding                     | 4.06E-07  | 3.888 |
| PTPRN2      | protein_coding                     | 0.0002103 | 3.888 |
| MYRIP       | protein_coding                     | 0.0001217 | 3.886 |
| SI          | protein_coding                     | 2.43E-05  | 3.885 |
| PEG3        | protein_coding                     | 2.35E-05  | 3.884 |
| AC008697.1  |                                    | 1.10E-07  | 3.882 |
| TLE4        | protein_coding                     | 0.0004015 | 3.881 |
| PIK3R5      | protein_coding                     | 4.68E-05  | 3.877 |
| CCDC39      | protein_coding                     | 5.29E-06  | 3.874 |
| SLC7A14-AS1 | lncRNA                             | 0.0001414 | 3.874 |
| RAB11FIP4   | protein_coding                     | 0.0002463 | 3.874 |
| VWF         | protein_coding                     | 0.001168  | 3.873 |
| MYLK4       | protein_coding                     | 1.16E-05  | 3.865 |
| RYR3        | protein_coding                     | 1.35E-09  | 3.863 |



|                  |                                |           |       |
|------------------|--------------------------------|-----------|-------|
| DGKB             | protein_coding                 | 0.0001051 | 3.861 |
| NPHS1            | protein_coding                 | 0.0002531 | 3.859 |
| AC074391.1       |                                | 1.14E-06  | 3.857 |
| COL24A1          | protein_coding                 | 3.57E-07  | 3.852 |
| DISC2            |                                | 2.04E-06  | 3.851 |
| RP11-680H20.2    |                                | 0.0001948 | 3.847 |
| ST6GAL1          | protein_coding                 | 7.77E-07  | 3.846 |
| FLG2             | protein_coding                 | 7.20E-05  | 3.843 |
| SLC1A2           | protein_coding                 | 3.51E-07  | 3.836 |
| NAALADL2         | protein_coding                 | 1.20E-06  | 3.836 |
| TFAP2D           | protein_coding                 | 0.0003039 | 3.835 |
| FREM2            | protein_coding                 | 0.0001132 | 3.835 |
| CTB-95D12.1      |                                | 0.0001328 | 3.830 |
| XIRP2            | protein_coding                 | 9.17E-06  | 3.828 |
| LMCD1-AS1        | lncRNA                         | 2.21E-05  | 3.827 |
| POU6F2           | protein_coding                 | 9.01E-07  | 3.826 |
| RELN             | protein_coding                 | 4.39E-09  | 3.824 |
| C7               | protein_coding                 | 6.97E-06  | 3.824 |
| GRIA1            | protein_coding                 | 5.17E-05  | 3.821 |
| TMC3-AS1         | lncRNA                         | 3.69E-05  | 3.820 |
| DMD              | protein_coding                 | 0.0045866 | 3.812 |
| COL5A2           | protein_coding                 | 6.93E-06  | 3.811 |
| XXbac-BPG55C20.7 |                                | 1.14E-05  | 3.811 |
| TTC41P           | transcribed_unitary_pseudogene | 1.14E-05  | 3.808 |
| IMPG2            | protein_coding                 | 0.0001661 | 3.807 |
| LINC01276        | lncRNA                         | 5.42E-05  | 3.806 |
| CCSER1           | protein_coding                 | 8.63E-06  | 3.805 |
| TF               | protein_coding                 | 1.12E-08  | 3.805 |
| SPTA1            | protein_coding                 | 0.0109679 | 3.800 |
| RP11-677M14.7    |                                | 8.17E-05  | 3.796 |
| APOB             | protein_coding                 | 3.89E-05  | 3.795 |
| MYCBPAP          | protein_coding                 | 1.21E-05  | 3.791 |
| GABRB3           | protein_coding                 | 0.0001033 | 3.790 |
| LINC00486        | lncRNA                         | 2.94E-06  | 3.789 |
| KCNH5            | protein_coding                 | 0.0002424 | 3.784 |
| BMPR1B           | protein_coding                 | 1.21E-05  | 3.781 |
| CASC19           | lncRNA                         | 1.46E-08  | 3.778 |
| LINC02731        | lncRNA                         | 0.0001872 | 3.778 |
| DMBT1L1          | transcribed_unitary_pseudogene | 4.08E-05  | 3.778 |
| WDR17            | protein_coding                 | 3.50E-06  | 3.771 |
| LAMTOR5-AS1      | lncRNA                         | 1.88E-07  | 3.769 |
| KALRN            | protein_coding                 | 2.35E-13  | 3.769 |
| ANO4             | protein_coding                 | 0.0003576 | 3.768 |
| PEX5L            | protein_coding                 | 3.95E-05  | 3.767 |
| RYR2             | protein_coding                 | 1.31E-09  | 3.764 |
| ST8SIA1          | protein_coding                 | 4.74E-05  | 3.763 |

|               |                      |           |       |
|---------------|----------------------|-----------|-------|
| LINC00320     | lncRNA               | 2.97E-05  | 3.755 |
| PREX2         | protein_coding       | 0.0001681 | 3.753 |
| MPPED2        | protein_coding       | 9.94E-05  | 3.753 |
| DELEC1        | lncRNA               | 0.0001308 | 3.744 |
| DTHD1         | protein_coding       | 5.11E-05  | 3.743 |
| DDX43         | protein_coding       | 0.0001217 | 3.739 |
| LINC01204     | lncRNA               | 0.000111  | 3.737 |
| NEFMP1        | processed_pseudogene | 4.93E-05  | 3.737 |
| TCHH          | protein_coding       | 3.99E-10  | 3.732 |
| RIMS1         | protein_coding       | 2.62E-10  | 3.731 |
| SRPX2         | protein_coding       | 4.23E-05  | 3.727 |
| LINC01551     | lncRNA               | 0.0006476 | 3.725 |
| AMZ1          | protein_coding       | 4.68E-05  | 3.721 |
| MYH2          | protein_coding       | 8.24E-06  | 3.720 |
| SIPA1L2       | protein_coding       | 3.96E-06  | 3.714 |
| SORBS1        | protein_coding       | 6.54E-06  | 3.714 |
| AJ006998.2    |                      | 0.0001991 | 3.713 |
| MEG3          | lncRNA               | 2.93E-07  | 3.709 |
| LINC02217     | lncRNA               | 0.0002745 | 3.709 |
| TTC21A        | protein_coding       | 4.56E-06  | 3.703 |
| PRKG2         | protein_coding       | 1.48E-05  | 3.703 |
| DRAIC         | lncRNA               | 9.31E-09  | 3.696 |
| RP11-281P23.3 |                      | 0.0002789 | 3.691 |
| SEC31B        | protein_coding       | 2.91E-05  | 3.687 |
| TMTC1         | protein_coding       | 6.14E-05  | 3.683 |
| RP11-421L21.3 |                      | 0.0001132 | 3.680 |
| HYDIN         | protein_coding       | 8.84E-10  | 3.679 |
| CD300E        | protein_coding       | 2.21E-05  | 3.676 |
| CCDC181       | protein_coding       | 0.0001135 | 3.676 |
| CACNB4        | protein_coding       | 9.69E-09  | 3.669 |
| PDGFRA        | protein_coding       | 9.20E-05  | 3.667 |
| DNAH3         | protein_coding       | 4.17E-07  | 3.665 |
| TTN-AS1       | lncRNA               | 3.59E-12  | 3.665 |
| ARHGEF33      | protein_coding       | 0.0003994 | 3.664 |
| NKD1          | protein_coding       | 0.0002247 | 3.664 |
| AGBL1         | protein_coding       | 0.0001684 | 3.661 |
| AC009264.1    |                      | 0.0004601 | 3.657 |
| RORC          | protein_coding       | 8.41E-05  | 3.656 |
| CTA-243E7.1   |                      | 7.98E-05  | 3.655 |
| LINC02884     | lncRNA               | 5.97E-05  | 3.654 |
| EML5          | protein_coding       | 6.04E-06  | 3.650 |
| FAM184B       | protein_coding       | 0.0001246 | 3.646 |
| LINC01847     | lncRNA               | 0.0010686 | 3.644 |
| LINC00870     | lncRNA               | 0.0001371 | 3.643 |
| TMEM67        | protein_coding       | 1.03E-05  | 3.640 |
| MGAT4C        | protein_coding       | 3.83E-05  | 3.638 |

|               |                                |           |       |
|---------------|--------------------------------|-----------|-------|
| CDH2          | protein_coding                 | 8.85E-06  | 3.637 |
| PDE6A         | protein_coding                 | 0.0004751 | 3.636 |
| LHFPL5        | protein_coding                 | 4.22E-06  | 3.634 |
| PTGFRN        | protein_coding                 | 0.0010547 | 3.632 |
| EML6          | protein_coding                 | 5.11E-09  | 3.629 |
| WT1           | protein_coding                 | 0.0002665 | 3.627 |
| ADCY10        | protein_coding                 | 0.0014775 | 3.624 |
| PLA2R1        | protein_coding                 | 1.16E-05  | 3.622 |
| DLGAP1        | protein_coding                 | 0.0001168 | 3.620 |
| KIRREL3       | protein_coding                 | 0.0001001 | 3.617 |
| LINC01146     | lncRNA                         | 0.0001558 | 3.614 |
| LINC00635     | lncRNA                         | 0.0024646 | 3.612 |
| RORA          | protein_coding                 | 0.0005228 | 3.609 |
| MBOAT1        | protein_coding                 | 1.58E-05  | 3.607 |
| ZDHHC13       | protein_coding                 | 1.73E-05  | 3.605 |
| NEB           | protein_coding                 | 1.22E-11  | 3.602 |
| IKZF1         | protein_coding                 | 0.000187  | 3.598 |
| LINC01320     | lncRNA                         | 9.79E-06  | 3.597 |
| SOX9-AS1      | lncRNA                         | 2.33E-06  | 3.588 |
| CTNNA2        | protein_coding                 | 5.31E-05  | 3.586 |
| MCTP2         | protein_coding                 | 1.14E-06  | 3.584 |
| AC006460.2    |                                | 5.53E-05  | 3.578 |
| FRAS1         | protein_coding                 | 9.50E-09  | 3.577 |
| CLIC5         | protein_coding                 | 1.67E-05  | 3.575 |
| ABCA13        | protein_coding                 | 4.45E-05  | 3.575 |
| KIAA0825      | protein_coding                 | 0.000366  | 3.572 |
| PRLR          | protein_coding                 | 4.11E-05  | 3.570 |
| CTTNBP2       | protein_coding                 | 0.0001379 | 3.570 |
| MYO15A        | protein_coding                 | 3.83E-06  | 3.564 |
| ABI3BP        | protein_coding                 | 1.25E-06  | 3.564 |
| ANGPT1        | protein_coding                 | 6.16E-05  | 3.563 |
| PHEX          | protein_coding                 | 7.69E-06  | 3.559 |
| ST3GAL6-AS1   | lncRNA                         | 2.54E-05  | 3.558 |
| CMAHP         | transcribed_unitary_pseudogene | 4.68E-07  | 3.558 |
| ELMO1         | protein_coding                 | 7.99E-06  | 3.556 |
| MAP7D2        | protein_coding                 | 0.0003134 | 3.554 |
| TRAF3IP3      | protein_coding                 | 5.41E-05  | 3.553 |
| PAX6          | protein_coding                 | 7.03E-05  | 3.552 |
| MOBP          | protein_coding                 | 0.0009973 | 3.551 |
| CFAP43        | protein_coding                 | 1.34E-06  | 3.551 |
| KIAA1549L     | protein_coding                 | 0.0001602 | 3.548 |
| XACT          | lncRNA                         | 0.0003478 | 3.545 |
| RP5-1014D13.2 |                                | 4.13E-06  | 3.544 |
| ACSM3         | protein_coding                 | 0.0001505 | 3.543 |
| ENPP2         | protein_coding                 | 0.0002212 | 3.538 |
| ADGRE2        | protein_coding                 | 2.01E-06  | 3.537 |

|               |                      |           |       |
|---------------|----------------------|-----------|-------|
| PDE4B         | protein_coding       | 3.82E-05  | 3.536 |
| NR2F2-AS1     | lncRNA               | 2.21E-05  | 3.533 |
| CHAT          | protein_coding       | 0.0006796 | 3.531 |
| HAND2-AS1     | lncRNA               | 0.000735  | 3.529 |
| ARHGAP20      | protein_coding       | 8.36E-05  | 3.527 |
| RP5-912I13.2  |                      | 8.06E-05  | 3.521 |
| SYNPO2        | protein_coding       | 1.89E-05  | 3.516 |
| MAP1A         | protein_coding       | 7.47E-05  | 3.515 |
| RP11-197K6.1  |                      | 0.0001437 | 3.513 |
| OSMR-AS1      | lncRNA               | 9.08E-05  | 3.513 |
| PECAM1        | protein_coding       | 3.16E-05  | 3.513 |
| SEMA6A        | protein_coding       | 0.0003457 | 3.511 |
| AC009518.4    |                      | 7.02E-05  | 3.510 |
| GALNT14       | protein_coding       | 0.0003305 | 3.508 |
| RALGPS1       | protein_coding       | 9.77E-06  | 3.507 |
| DOCK3         | protein_coding       | 2.29E-07  | 3.507 |
| ADGRL3        | protein_coding       | 7.54E-05  | 3.499 |
| CDHR3         | protein_coding       | 3.09E-06  | 3.496 |
| LINC00607     | lncRNA               | 6.31E-05  | 3.493 |
| LINC01524     | lncRNA               | 7.21E-05  | 3.487 |
| NWD1          | protein_coding       | 8.24E-06  | 3.484 |
| CTD-2553C6.1  |                      | 0.0001991 | 3.481 |
| LINC00861     | lncRNA               | 0.0001251 | 3.481 |
| SCN3B         | protein_coding       | 0.0007423 | 3.479 |
| MYH14         | protein_coding       | 3.55E-05  | 3.479 |
| CFTR          | protein_coding       | 2.33E-05  | 3.477 |
| RP1-206D15.6  |                      | 0.0001775 | 3.476 |
| RP11-115D19.1 |                      | 0.0001069 | 3.464 |
| NSRP1P1       | processed_pseudogene | 0.0017205 | 3.463 |
| KCNQ1OT1      | lncRNA               | 6.63E-27  | 3.459 |
| LINC01192     | lncRNA               | 0.0003612 | 3.456 |
| RBM20         | protein_coding       | 4.10E-06  | 3.455 |
| DLEU1         | lncRNA               | 1.16E-07  | 3.451 |
| NTRK2         | protein_coding       | 0.0003338 | 3.445 |
| GABBR2        | protein_coding       | 0.0001292 | 3.444 |
| ADGRF4        | protein_coding       | 0.0003912 | 3.441 |
| SNORD3A       | snoRNA               | 3.12E-52  | 3.436 |
| ANKFN1        | protein_coding       | 6.43E-06  | 3.434 |
| RP1-258E1.2   |                      | 1.26E-05  | 3.430 |
| ZRANB2-AS2    | lncRNA               | 4.65E-06  | 3.430 |
| MIR3681HG     | lncRNA               | 8.35E-06  | 3.428 |
| CDH18         | protein_coding       | 0.0001231 | 3.424 |
| ADAM12        | protein_coding       | 5.43E-06  | 3.419 |
| SLC6A15       | protein_coding       | 0.0002413 | 3.417 |
| VCAN          | protein_coding       | 0.0001474 | 3.417 |
| GARNL3        | protein_coding       | 1.43E-07  | 3.416 |

|               |                                |           |       |
|---------------|--------------------------------|-----------|-------|
| BCAS1         | protein_coding                 | 2.04E-06  | 3.414 |
| SPEF2         | protein_coding                 | 5.59E-11  | 3.409 |
| SULT1C2       | protein_coding                 | 1.32E-05  | 3.407 |
| RP11-19F9.2   |                                | 0.0001391 | 3.399 |
| TEX14         | protein_coding                 | 7.08E-06  | 3.394 |
| ALDH1A2       | protein_coding                 | 0.0001068 | 3.393 |
| FSTL4         | protein_coding                 | 0.0004406 | 3.392 |
| DTNA          | protein_coding                 | 8.60E-06  | 3.392 |
| ZNF483        | protein_coding                 | 0.0006907 | 3.381 |
| LINC01284     | lncRNA                         | 9.97E-05  | 3.379 |
| USH2A         | protein_coding                 | 0.0193161 | 3.378 |
| JAKMIP3       | protein_coding                 | 0.000459  | 3.377 |
| NR4A3         | protein_coding                 | 5.51E-05  | 3.377 |
| XKR4          | protein_coding                 | 6.33E-05  | 3.377 |
| ZNF891        | protein_coding                 | 2.55E-05  | 3.373 |
| RAD51B        | protein_coding                 | 3.05E-05  | 3.371 |
| EPB41L4A      | protein_coding                 | 1.94E-06  | 3.369 |
| ESRRG         | protein_coding                 | 3.97E-05  | 3.368 |
| EGF           | protein_coding                 | 0.0001347 | 3.367 |
| MPP4          | protein_coding                 | 0.0002211 | 3.366 |
| PSG4          | protein_coding                 | 3.50E-05  | 3.364 |
| RP11-154D6.1  |                                | 0.0017557 | 3.362 |
| COL11A1       | protein_coding                 | 0.0005037 | 3.359 |
| CTD-2353F22.1 |                                | 0.000339  | 3.359 |
| TTBK1         | protein_coding                 | 0.0004483 | 3.355 |
| IQGAP2        | protein_coding                 | 8.71E-06  | 3.355 |
| SGIP1         | protein_coding                 | 0.0001084 | 3.353 |
| L1TD1         | protein_coding                 | 0.0018914 | 3.353 |
| FHAD1         | protein_coding                 | 7.72E-10  | 3.353 |
| WDR87         | protein_coding                 | 7.49E-09  | 3.351 |
| RP1-140K8.5   |                                | 7.35E-05  | 3.350 |
| KYNU          | protein_coding                 | 9.72E-08  | 3.346 |
| PSMD7-DT      | lncRNA                         | 0.0030457 | 3.346 |
| CRELD1        | protein_coding                 | 0.0002103 | 3.344 |
| GRM5          | protein_coding                 | 6.11E-05  | 3.339 |
| STRADA        | protein_coding                 | 0.0002704 | 3.339 |
| SAP30L-AS1    | lncRNA                         | 0.0001719 | 3.335 |
| GNG2          | protein_coding                 | 0.0001373 | 3.329 |
| DMKN          | protein_coding                 | 4.50E-05  | 3.329 |
| FER1L4        | transcribed_unitary_pseudogene | 3.59E-05  | 3.329 |
| NRK           | protein_coding                 | 0.0009213 | 3.328 |
| MEIS1         | protein_coding                 | 0.0010448 | 3.327 |
| ST3GAL3       | protein_coding                 | 8.24E-06  | 3.324 |
| LINC01197     | lncRNA                         | 0.0001461 | 3.324 |
| SHROOM4       | protein_coding                 | 0.0001505 | 3.322 |
| ZBED3-AS1     | lncRNA                         | 9.86E-05  | 3.320 |

|               |                                    |           |       |
|---------------|------------------------------------|-----------|-------|
| ITPR1         | protein_coding                     | 1.14E-17  | 3.317 |
| DNAH11        | protein_coding                     | 7.54E-12  | 3.312 |
| RP13-143G15.4 |                                    | 0.0004759 | 3.308 |
| FCN1          | protein_coding                     | 3.24E-05  | 3.308 |
| RAB3B         | protein_coding                     | 2.52E-05  | 3.306 |
| RNF217-AS1    | lncRNA                             | 0.0003555 | 3.305 |
| PAXBP1-AS1    | lncRNA                             | 0.0003747 | 3.303 |
| LINC00470     | lncRNA                             | 0.0028026 | 3.302 |
| GDAP1         | protein_coding                     | 5.29E-06  | 3.302 |
| ST8SIA5       | protein_coding                     | 0.0007775 | 3.301 |
| STOX2         | protein_coding                     | 0.0001099 | 3.298 |
| TRPM6         | protein_coding                     | 0.0002108 | 3.295 |
| MUC19         | protein_coding                     | 1.86E-05  | 3.294 |
| ARPP21        | protein_coding                     | 0.0004438 | 3.294 |
| PRKG1         | protein_coding                     | 4.40E-06  | 3.291 |
| LINC00271     | lncRNA                             | 0.0001474 | 3.286 |
| RNF150        | protein_coding                     | 9.61E-05  | 3.283 |
| CACNG8        | protein_coding                     | 4.23E-05  | 3.281 |
| HELLPAR       | lncRNA                             | 0.001143  | 3.280 |
| COL21A1       | protein_coding                     | 4.79E-05  | 3.279 |
| ABCB4         | protein_coding                     | 0.0003032 | 3.263 |
| LINC01138     | lncRNA                             | 0.0001281 | 3.261 |
| PPP5D1        | transcribed_unprocessed_pseudogene | 0.000287  | 3.260 |
| RALY-AS1      | lncRNA                             | 5.47E-05  | 3.256 |
| PPFIA3        | protein_coding                     | 0.0002274 | 3.250 |
| ITGA1         | protein_coding                     | 2.31E-08  | 3.249 |
| SYBU          | protein_coding                     | 2.96E-05  | 3.246 |
| ERBB3         | protein_coding                     | 1.46E-05  | 3.245 |
| MIR646HG      | lncRNA                             | 6.58E-10  | 3.244 |
| BCL11A        | protein_coding                     | 0.0002107 | 3.243 |
| DAPK1         | protein_coding                     | 0.0014565 | 3.242 |
| COL15A1       | protein_coding                     | 2.53E-05  | 3.241 |
| LINC01226     | lncRNA                             | 0.0036952 | 3.233 |
| TTN           | protein_coding                     | 0.0285051 | 3.219 |
| HDAC2-AS2     | lncRNA                             | 1.02E-05  | 3.218 |
| CASC11        | lncRNA                             | 0.0033661 | 3.217 |
| NALCN         | protein_coding                     | 1.75E-06  | 3.211 |
| NEK10         | protein_coding                     | 7.38E-05  | 3.211 |
| ANK2          | protein_coding                     | 2.29E-18  | 3.210 |
| TPRG1         | protein_coding                     | 0.0001836 | 3.204 |
| TTC39A        | protein_coding                     | 0.0006039 | 3.202 |
| OR2F1         | protein_coding                     | 0.0029118 | 3.199 |
| ANKRD36BP2    | transcribed_unprocessed_pseudogene | 0.0020621 | 3.193 |
| PLA2G4C       | protein_coding                     | 0.0025293 | 3.191 |
| CNTNAP3       | protein_coding                     | 9.34E-06  | 3.190 |
| CLCN5         | protein_coding                     | 1.52E-05  | 3.188 |

|               |                |           |       |
|---------------|----------------|-----------|-------|
| ERICH6B       | protein_coding | 0.0013404 | 3.185 |
| RP11-33A14.1  |                | 0.0033471 | 3.184 |
| TTC13         | protein_coding | 4.16E-05  | 3.183 |
| AC092071.1    |                | 0.0001712 | 3.180 |
| DNAH9         | protein_coding | 0.029103  | 3.177 |
| PLD5          | protein_coding | 0.0033218 | 3.177 |
| SNCAIP        | protein_coding | 0.0023539 | 3.176 |
| TMEM232       | protein_coding | 0.0011079 | 3.172 |
| PROM1         | protein_coding | 0.0064977 | 3.172 |
| DNAH12        | protein_coding | 6.40E-05  | 3.169 |
| CHD5          | protein_coding | 0.0011222 | 3.168 |
| FRY           | protein_coding | 5.93E-05  | 3.165 |
| DIXDC1        | protein_coding | 0.0001133 | 3.165 |
| BAALC-AS1     | lncRNA         | 1.69E-05  | 3.160 |
| THSD7B        | protein_coding | 0.0008306 | 3.159 |
| TMEM144       | protein_coding | 0.000304  | 3.158 |
| PDZD2         | protein_coding | 3.35E-08  | 3.151 |
| RP11-673E1.1  |                | 5.33E-05  | 3.147 |
| SLC1A3        | protein_coding | 2.08E-08  | 3.145 |
| PTPRB         | protein_coding | 0.0012744 | 3.144 |
| HECW1         | protein_coding | 4.32E-07  | 3.144 |
| ST18          | protein_coding | 0.0045307 | 3.144 |
| DCC           | protein_coding | 0.006972  | 3.139 |
| CEP43         | protein_coding | 4.76E-07  | 3.130 |
| LINC01609     | lncRNA         | 0.0007921 | 3.129 |
| DSC2          | protein_coding | 0.0010593 | 3.124 |
| ST3GAL5       | protein_coding | 2.35E-10  | 3.120 |
| AXDND1        | protein_coding | 0.0002613 | 3.118 |
| MIR4500HG     | lncRNA         | 4.21E-05  | 3.117 |
| LIFR-AS1      | lncRNA         | 0.0009973 | 3.115 |
| CGN           | protein_coding | 0.0002813 | 3.114 |
| LINC01748     | lncRNA         | 0.0013921 | 3.113 |
| PLCB4         | protein_coding | 0.0012417 | 3.108 |
| GAS7          | protein_coding | 0.0001606 | 3.107 |
| RUBCNL        | protein_coding | 0.0089779 | 3.107 |
| MUC5AC        | protein_coding | 7.98E-05  | 3.106 |
| DGKE          | protein_coding | 0.0004055 | 3.101 |
| CFAP54        | protein_coding | 0.0004262 | 3.101 |
| CCDC187       | protein_coding | 0.0016229 | 3.096 |
| BSN           | protein_coding | 0.0002876 | 3.094 |
| SLC38A9       | protein_coding | 0.0001025 | 3.092 |
| NRCAM         | protein_coding | 0.0011477 | 3.091 |
| CCDC144NL-AS1 | lncRNA         | 3.05E-05  | 3.089 |
| RTCA-AS1      | lncRNA         | 0.0003138 | 3.089 |
| ADAM22        | protein_coding | 0.0003035 | 3.087 |
| CPNE5         | protein_coding | 0.0004478 | 3.081 |

|                |                                    |           |       |
|----------------|------------------------------------|-----------|-------|
| RASGEF1B       | protein_coding                     | 0.0018037 | 3.077 |
| CEP63          | protein_coding                     | 3.24E-05  | 3.074 |
| AFF3           | protein_coding                     | 1.50E-05  | 3.072 |
| NUP210         | protein_coding                     | 5.16E-05  | 3.071 |
| ZNF767P        | transcribed_unprocessed_pseudogene | 7.66E-05  | 3.069 |
| CTD-2201E18.3  |                                    | 0.0002113 | 3.068 |
| LINC01572      | lncRNA                             | 0.0001389 | 3.066 |
| CNBD2          | protein_coding                     | 0.0004508 | 3.063 |
| PPP1R9A        | protein_coding                     | 0.0003994 | 3.061 |
| RP11-190A12.10 |                                    | 0.0002066 | 3.057 |
| RP11-6G22.1    |                                    | 3.65E-05  | 3.057 |
| ZFPM2          | protein_coding                     | 0.0035996 | 3.056 |
| POT1-AS1       | lncRNA                             | 8.30E-07  | 3.052 |
| LINC02223      | lncRNA                             | 0.0004363 | 3.052 |
| CEACAM1        | protein_coding                     | 0.0013532 | 3.048 |
| CPS1           | protein_coding                     | 0.0001588 | 3.044 |
| RYR1           | protein_coding                     | 0.0443739 | 3.041 |
| PKHD1L1        | protein_coding                     | 0.0104776 | 3.036 |
| CDKL5          | protein_coding                     | 2.09E-05  | 3.036 |
| CNTNAP1        | protein_coding                     | 6.73E-05  | 3.034 |
| PPM1F-AS1      | lncRNA                             | 1.05E-05  | 3.033 |
| SCART1         | protein_coding                     | 0.000974  | 3.032 |
| LOXHD1         | protein_coding                     | 0.0102922 | 3.032 |
| RP11-10K16.1   |                                    | 0.0004677 | 3.031 |
| CFAP70         | protein_coding                     | 5.93E-05  | 3.028 |
| Y_RNA          | misc_RNA                           | 0.0005442 | 3.026 |
| MUC5B          | protein_coding                     | 0.0040694 | 3.023 |
| DISC1          | protein_coding                     | 0.0005472 | 3.023 |
| CYP1B1-AS1     | lncRNA                             | 3.00E-06  | 3.021 |
| RP11-37B2.1    |                                    | 9.23E-07  | 3.020 |
| ARHGAP30       | protein_coding                     | 0.0007078 | 3.019 |
| VWA3B          | protein_coding                     | 0.0056907 | 3.018 |
| PRKCH          | protein_coding                     | 0.000456  | 3.017 |
| CCDC144CP      | transcribed_processed_pseudogene   | 0.0023696 | 3.005 |
| LINC01234      | lncRNA                             | 0.0009866 | 3.005 |
| GBP5           | protein_coding                     | 0.0034504 | 3.003 |
| GPR26          | protein_coding                     | 0.0014366 | 3.001 |
| GOLGA2P5       | transcribed_unprocessed_pseudogene | 5.29E-05  | 2.999 |
| SCIN           | protein_coding                     | 0.0007831 | 2.999 |
| MYH15          | protein_coding                     | 9.73E-08  | 2.995 |
| PXYLP1         | protein_coding                     | 0.000994  | 2.992 |
| PAPPA          | protein_coding                     | 0.0006854 | 2.991 |
| PLXNA4         | protein_coding                     | 1.67E-06  | 2.988 |
| PTPRH          | protein_coding                     | 0.0003657 | 2.986 |
| PRNCR1         | lncRNA                             | 0.0002292 | 2.985 |
| PLCL1          | protein_coding                     | 0.0003077 | 2.978 |



|                |                |           |       |
|----------------|----------------|-----------|-------|
| OLMALINC       | lncRNA         | 2.42E-05  | 2.977 |
| ARMH4          | protein_coding | 0.0011679 | 2.976 |
| EFCAB13        | protein_coding | 0.0001643 | 2.971 |
| ZBTB7C         | protein_coding | 0.0029788 | 2.960 |
| KLF8           | protein_coding | 0.0008626 | 2.959 |
| NPL            | protein_coding | 0.0012103 | 2.952 |
| PPFIA2         | protein_coding | 0.001616  | 2.944 |
| PPARGC1B       | protein_coding | 0.0001005 | 2.943 |
| SUSD4          | protein_coding | 0.0005939 | 2.940 |
| NHSL2          | protein_coding | 0.0018274 | 2.939 |
| NUTM2B-AS1     | lncRNA         | 0.0017238 | 2.938 |
| CD36           | protein_coding | 0.0060385 | 2.932 |
| NRXN1          | protein_coding | 0.0304219 | 2.929 |
| TGFB3          | protein_coding | 3.46E-06  | 2.923 |
| EPM2A          | protein_coding | 0.0003913 | 2.922 |
| CELSR1         | protein_coding | 4.87E-05  | 2.922 |
| ARMCX4         | protein_coding | 0.0028991 | 2.916 |
| RP11-646I6.3   |                | 0.0039043 | 2.912 |
| AGPAT4         | protein_coding | 0.0012514 | 2.911 |
| MAILR          | lncRNA         | 0.0002005 | 2.909 |
| HSPA12A        | protein_coding | 2.82E-07  | 2.908 |
| ADAMTS9-AS2    | lncRNA         | 0.0033217 | 2.907 |
| ABCA5          | protein_coding | 5.97E-05  | 2.906 |
| COL1A1         | protein_coding | 0.0001263 | 2.906 |
| SYP            | protein_coding | 0.0034012 | 2.901 |
| CECR2          | protein_coding | 0.0125638 | 2.900 |
| RP11-696N14.1  |                | 3.08E-05  | 2.899 |
| MSI2           | protein_coding | 5.43E-05  | 2.897 |
| KCNMA1         | protein_coding | 0.0399945 | 2.892 |
| ADAMTS16       | protein_coding | 6.24E-05  | 2.892 |
| PDE1C          | protein_coding | 7.81E-06  | 2.891 |
| DLEC1          | protein_coding | 0.0035893 | 2.890 |
| CH507-528H12.1 |                | 2.45E-08  | 2.888 |
| C10orf90       | protein_coding | 0.0038439 | 2.880 |
| TMEM41A        | protein_coding | 3.77E-05  | 2.875 |
| MED12L         | protein_coding | 0.0004296 | 2.872 |
| KIAA1755       | protein_coding | 0.0069561 | 2.872 |
| ZFH2           | protein_coding | 0.0001096 | 2.872 |
| PREX1          | protein_coding | 0.0021879 | 2.869 |
| ANKRD44        | protein_coding | 0.0001739 | 2.865 |
| TNFSF15        | protein_coding | 0.0017436 | 2.862 |
| PCDH7          | protein_coding | 0.0004795 | 2.861 |
| SH3YL1         | protein_coding | 0.0010966 | 2.857 |
| ACOXL          | protein_coding | 0.0010849 | 2.857 |
| EPHA1          | protein_coding | 0.0016524 | 2.854 |
| ADTRP          | protein_coding | 0.0003258 | 2.852 |

|              |                |           |       |
|--------------|----------------|-----------|-------|
| RP11-319G6.1 |                | 0.0007773 | 2.841 |
| PLEKHH1      | protein_coding | 0.0001793 | 2.840 |
| COBL         | protein_coding | 0.0001257 | 2.839 |
| SRRM5        | protein_coding | 3.47E-05  | 2.836 |
| IFI44L       | protein_coding | 0.000113  | 2.832 |
| MYO16        | protein_coding | 0.0025315 | 2.816 |
| OTULINL      | protein_coding | 3.66E-05  | 2.810 |
| KLHL6        | protein_coding | 0.0050206 | 2.806 |
| THRB         | protein_coding | 0.0042412 | 2.798 |
| ABCA3        | protein_coding | 0.0024975 | 2.795 |
| DOCK10       | protein_coding | 0.0002001 | 2.787 |
| DGKI         | protein_coding | 3.57E-07  | 2.786 |
| ADGRF1       | protein_coding | 0.0004409 | 2.785 |
| PRTG         | protein_coding | 0.0001593 | 2.782 |
| IRAG1        | protein_coding | 0.0100194 | 2.781 |
| PTPRQ        | protein_coding | 0.002525  | 2.777 |
| PDGFRB       | protein_coding | 0.0006444 | 2.770 |
| SP140        | protein_coding | 2.13E-05  | 2.768 |
| NCAM2        | protein_coding | 0.0009178 | 2.765 |
| ADGRD1       | protein_coding | 0.0005839 | 2.757 |
| EFHC1        | protein_coding | 8.41E-11  | 2.750 |
| ERN1         | protein_coding | 1.26E-07  | 2.748 |
| ELAPOR1      | protein_coding | 0.0039847 | 2.745 |
| OBSCN        | protein_coding | 2.87E-06  | 2.744 |
| DPF3         | protein_coding | 0.0012352 | 2.743 |
| DEPDC5       | protein_coding | 0.0005655 | 2.742 |
| ITGB8        | protein_coding | 0.000564  | 2.738 |
| NOS3         | protein_coding | 0.0011715 | 2.736 |
| FRMD4B       | protein_coding | 1.52E-05  | 2.732 |
| CC2D2B       | protein_coding | 0.009779  | 2.729 |
| ROBO1        | protein_coding | 0.0001885 | 2.729 |
| MEGF6        | protein_coding | 0.0005063 | 2.729 |
| TENM3        | protein_coding | 0.0006745 | 2.723 |
| SMARCE1      | protein_coding | 0.0005931 | 2.720 |
| RP11-823P9.3 |                | 0.010005  | 2.719 |
| GALNTL6      | protein_coding | 0.008829  | 2.717 |
| SLC4A8       | protein_coding | 1.34E-05  | 2.716 |
| FILIP1       | protein_coding | 1.86E-05  | 2.712 |
| SCN9A        | protein_coding | 0.0001385 | 2.711 |
| RP11-295P9.3 |                | 0.0004431 | 2.706 |
| LINC02615    | lncRNA         | 0.0005011 | 2.701 |
| RP1-23O21.2  |                | 0.0005559 | 2.700 |
| AL163953.3   |                | 0.0002361 | 2.692 |
| PPFIA4       | protein_coding | 0.0002538 | 2.691 |
| PLEKHG4B     | protein_coding | 0.0001519 | 2.690 |
| KIF21B       | protein_coding | 0.000255  | 2.688 |

|             |                |           |       |
|-------------|----------------|-----------|-------|
| MYRF        | protein_coding | 0.002624  | 2.687 |
| ATL1        | protein_coding | 9.16E-07  | 2.686 |
| CUBN        | protein_coding | 4.46E-05  | 2.679 |
| COL16A1     | protein_coding | 0.0026357 | 2.675 |
| XDH         | protein_coding | 0.000908  | 2.674 |
| PCLO        | protein_coding | 2.68E-10  | 2.669 |
| ABCC9       | protein_coding | 0.0012764 | 2.667 |
| LINC00654   | lncRNA         | 0.0143441 | 2.665 |
| PTN         | protein_coding | 0.0026173 | 2.660 |
| FAM9A       | protein_coding | 0.0074647 | 2.644 |
| MAGI2-AS3   | lncRNA         | 0.0003664 | 2.643 |
| GVQW3       | protein_coding | 0.0002438 | 2.637 |
| MED17       | protein_coding | 7.49E-05  | 2.635 |
| SLC47A1     | protein_coding | 0.0034868 | 2.633 |
| GREB1       | protein_coding | 0.0115278 | 2.630 |
| LINC01588   | lncRNA         | 1.21E-07  | 2.628 |
| IRF1-AS1    | lncRNA         | 0.0021845 | 2.621 |
| LINC00856   | lncRNA         | 0.0122761 | 2.620 |
| EVC2        | protein_coding | 0.0029788 | 2.619 |
| RECK        | protein_coding | 0.0039773 | 2.618 |
| ASAH2       | protein_coding | 0.0029837 | 2.613 |
| SLC13A4     | protein_coding | 0.0329267 | 2.596 |
| TUB         | protein_coding | 0.0078319 | 2.596 |
| DENND2C     | protein_coding | 0.0016669 | 2.595 |
| POC1B-AS1   | lncRNA         | 0.0006575 | 2.582 |
| NOD1        | protein_coding | 0.0037865 | 2.579 |
| C2CD6       | protein_coding | 0.0033547 | 2.579 |
| DNAI4       | protein_coding | 0.0027915 | 2.578 |
| C3orf35     | lncRNA         | 0.0026441 | 2.578 |
| DCLK1       | protein_coding | 0.0033453 | 2.570 |
| MAP3K15     | protein_coding | 0.0020762 | 2.568 |
| COL4A4      | protein_coding | 0.0058104 | 2.565 |
| PLXNC1      | protein_coding | 0.0046844 | 2.564 |
| FTX         | lncRNA         | 1.29E-05  | 2.564 |
| MYH3        | protein_coding | 2.24E-08  | 2.561 |
| EYA4        | protein_coding | 0.0048122 | 2.556 |
| TRIM52      | protein_coding | 0.0038646 | 2.549 |
| MAST1       | protein_coding | 0.0022593 | 2.547 |
| DNMT3A      | protein_coding | 1.29E-05  | 2.537 |
| FSIP2       | protein_coding | 0.0005725 | 2.529 |
| NR6A1       | protein_coding | 0.0003801 | 2.525 |
| BTN2A2      | protein_coding | 7.60E-05  | 2.524 |
| WDR27       | protein_coding | 0.0001158 | 2.519 |
| GS1-519E5.1 |                | 1.61E-06  | 2.519 |
| RGS5        | protein_coding | 0.0003913 | 2.511 |
| RAPGEF3     | protein_coding | 0.0002915 | 2.509 |

|               |                |           |       |
|---------------|----------------|-----------|-------|
| NLGN1         | protein_coding | 0.0004592 | 2.507 |
| RP11-712B9.2  |                | 0.0036866 | 2.505 |
| ADAMTS1       | protein_coding | 0.0012417 | 2.502 |
| GALC          | protein_coding | 0.0019452 | 2.500 |
| PABPC1L       | protein_coding | 2.05E-05  | 2.500 |
| NPR3          | protein_coding | 0.0051475 | 2.499 |
| LINC01229     | lncRNA         | 0.0077629 | 2.499 |
| DNAH5         | protein_coding | 2.41E-08  | 2.499 |
| DENND2A       | protein_coding | 0.0010558 | 2.498 |
| ZNF737        | protein_coding | 0.0061271 | 2.498 |
| TNS1          | protein_coding | 0.0014745 | 2.495 |
| SLC35E3       | protein_coding | 2.35E-05  | 2.488 |
| ZKSCAN4       | protein_coding | 0.0036787 | 2.486 |
| SLC38A6       | protein_coding | 0.0002788 | 2.484 |
| SYT12         | protein_coding | 0.0074357 | 2.483 |
| SGSH          | protein_coding | 0.0055742 | 2.483 |
| C5            | protein_coding | 5.08E-05  | 2.480 |
| MARK1         | protein_coding | 0.0001398 | 2.476 |
| FGGY          | protein_coding | 0.0003457 | 2.476 |
| CFAP44        | protein_coding | 0.005846  | 2.474 |
| PRDM16        | protein_coding | 0.0076606 | 2.464 |
| TVP23C        | protein_coding | 0.0076304 | 2.462 |
| LINC00472     | lncRNA         | 6.99E-06  | 2.452 |
| LMBRD1        | protein_coding | 0.0011716 | 2.447 |
| CLHC1         | protein_coding | 0.0061879 | 2.445 |
| CCDC142       | protein_coding | 0.0061703 | 2.444 |
| NPHP1         | protein_coding | 2.97E-05  | 2.439 |
| SORCS2        | protein_coding | 0.0042237 | 2.438 |
| NEO1          | protein_coding | 0.0032643 | 2.437 |
| RP11-242D8.1  |                | 0.0013046 | 2.437 |
| ABAT          | protein_coding | 0.0041637 | 2.436 |
| ATP9A         | protein_coding | 0.0001283 | 2.436 |
| CCDC40        | protein_coding | 0.0005242 | 2.435 |
| PDLIM3        | protein_coding | 0.0020292 | 2.434 |
| ZNF141        | protein_coding | 0.0024922 | 2.426 |
| ADAMTSL1      | protein_coding | 0.000304  | 2.424 |
| LONRF2        | protein_coding | 0.0033751 | 2.424 |
| ADCK1         | protein_coding | 0.0102283 | 2.421 |
| ANKRD36C      | protein_coding | 3.70E-07  | 2.418 |
| ANKRD36       | protein_coding | 4.32E-07  | 2.418 |
| RP11-463O12.5 |                | 0.0035182 | 2.414 |
| QRICH2        | protein_coding | 0.0011492 | 2.414 |
| TMEM30A-DT    | lncRNA         | 0.0022954 | 2.408 |
| NRP2          | protein_coding | 3.55E-05  | 2.408 |
| GREB1L        | protein_coding | 2.02E-05  | 2.403 |
| NDUFA9        | protein_coding | 0.0124764 | 2.397 |

|            |                |           |       |
|------------|----------------|-----------|-------|
| GDPD5      | protein_coding | 0.0034352 | 2.395 |
| SLIT2      | protein_coding | 2.92E-06  | 2.392 |
| TMEM132A   | protein_coding | 0.0020687 | 2.392 |
| ATP8A1     | protein_coding | 0.00453   | 2.390 |
| LRGUK      | protein_coding | 0.0201793 | 2.388 |
| ATOH8      | protein_coding | 0.0193018 | 2.384 |
| CYP2U1-AS1 | lncRNA         | 0.0025611 | 2.379 |
| RNASET2    | protein_coding | 7.06E-05  | 2.378 |
| SEMA4D     | protein_coding | 2.09E-05  | 2.376 |
| GRIK2      | protein_coding | 0.0018839 | 2.375 |
| CSF1R      | protein_coding | 0.00422   | 2.374 |
| MCM3AP-AS1 | lncRNA         | 0.0018228 | 2.374 |
| PDE2A      | protein_coding | 0.005876  | 2.373 |
| PGAP1      | protein_coding | 0.006378  | 2.371 |
| TRABD2A    | protein_coding | 0.0054519 | 2.368 |
| ABCG2      | protein_coding | 0.0113238 | 2.366 |
| CACNB3     | protein_coding | 0.0209144 | 2.365 |
| ADAMTS9    | protein_coding | 0.0003129 | 2.360 |
| TBCK       | protein_coding | 8.69E-05  | 2.359 |
| WDPCP      | protein_coding | 0.0013364 | 2.358 |
| FASTKD1    | protein_coding | 0.0067528 | 2.352 |
| SUSD6      | protein_coding | 0.0043105 | 2.349 |
| DZIP1L     | protein_coding | 0.0030827 | 2.347 |
| INTS6-AS1  | lncRNA         | 0.0451496 | 2.339 |
| SYT1       | protein_coding | 0.0011466 | 2.339 |
| COX10-AS1  | lncRNA         | 0.0052992 | 2.338 |
| BANK1      | protein_coding | 0.0016648 | 2.338 |
| ACER3      | protein_coding | 2.42E-05  | 2.334 |
| RIMKLA     | protein_coding | 0.0094705 | 2.333 |
| CFH        | protein_coding | 0.0001469 | 2.328 |
| CCDC150    | protein_coding | 3.79E-05  | 2.326 |
| LRIG1      | protein_coding | 0.0043232 | 2.325 |
| SORL1      | protein_coding | 5.47E-08  | 2.324 |
| ARHGAP24   | protein_coding | 0.0025079 | 2.320 |
| UBA6-AS1   | lncRNA         | 0.0001199 | 2.317 |
| CYFIP2     | protein_coding | 1.20E-05  | 2.314 |
| IMMP2L     | protein_coding | 0.0139784 | 2.311 |
| PAG1       | protein_coding | 0.0003242 | 2.310 |
| CNKSRR3    | protein_coding | 0.0003317 | 2.306 |
| PTK7       | protein_coding | 0.0001391 | 2.305 |
| ZC2HC1C    | protein_coding | 0.0008497 | 2.305 |
| MYO5B      | protein_coding | 0.0036684 | 2.305 |
| C1RL-AS1   | lncRNA         | 0.0133867 | 2.304 |
| WDR91      | protein_coding | 0.0006892 | 2.303 |
| TPK1       | protein_coding | 0.0060612 | 2.303 |
| IL15       | protein_coding | 0.0259512 | 2.300 |

|               |                                    |           |       |
|---------------|------------------------------------|-----------|-------|
| MFAP3L        | protein_coding                     | 0.0109173 | 2.298 |
| DGKH          | protein_coding                     | 0.000408  | 2.296 |
| MERTK         | protein_coding                     | 0.0028787 | 2.296 |
| PROS1         | protein_coding                     | 0.0008626 | 2.291 |
| PNPLA7        | protein_coding                     | 0.0271977 | 2.289 |
| TRDMT1        | protein_coding                     | 0.00036   | 2.280 |
| HCG11         | lncRNA                             | 0.0036403 | 2.280 |
| POLG2         | protein_coding                     | 0.0081011 | 2.279 |
| TULP1         | protein_coding                     | 0.0312186 | 2.279 |
| ATP1A1-AS1    | lncRNA                             | 5.69E-05  | 2.276 |
| ODAD2         | protein_coding                     | 0.0043387 | 2.275 |
| HHAT          | protein_coding                     | 0.0108344 | 2.275 |
| ITGA10        | protein_coding                     | 0.0026067 | 2.269 |
| USP49         | protein_coding                     | 0.0039449 | 2.269 |
| ZBTB37        | protein_coding                     | 0.000255  | 2.267 |
| MDGA1         | protein_coding                     | 3.78E-09  | 2.267 |
| SHPRH         | protein_coding                     | 9.83E-05  | 2.267 |
| CTD-2017D11.1 |                                    | 0.007012  | 2.266 |
| CEMIP2        | protein_coding                     | 8.53E-05  | 2.265 |
| SEMA4F        | protein_coding                     | 0.0033751 | 2.261 |
| ZNF649        | protein_coding                     | 0.0040683 | 2.259 |
| SDK1          | protein_coding                     | 2.13E-05  | 2.259 |
| ACTR3C        | protein_coding                     | 0.0065929 | 2.257 |
| MPP7          | protein_coding                     | 0.0125374 | 2.254 |
| MIR924HG      | lncRNA                             | 2.74E-05  | 2.251 |
| CREB5         | protein_coding                     | 0.0035182 | 2.250 |
| SLC22A15      | protein_coding                     | 0.0054535 | 2.248 |
| PDE4DIPP2     | transcribed_unprocessed_pseudogene | 0.0001259 | 2.248 |
| LINC00662     | lncRNA                             | 8.84E-06  | 2.242 |
| BTBD8         | protein_coding                     | 0.0042412 | 2.234 |
| LINC00665     | lncRNA                             | 0.0048598 | 2.231 |
| SNED1         | protein_coding                     | 0.0113934 | 2.231 |
| SPTBN2        | protein_coding                     | 0.001552  | 2.227 |
| PLAAT5        | protein_coding                     | 0.0070588 | 2.224 |
| KDR           | protein_coding                     | 0.0339407 | 2.222 |
| RAB33B-AS1    | lncRNA                             | 0.0330131 | 2.219 |
| VLDLR         | protein_coding                     | 4.51E-05  | 2.219 |
| EIF2AK3       | protein_coding                     | 4.22E-06  | 2.218 |
| KCP           | protein_coding                     | 0.0100194 | 2.217 |
| S1PR3         | protein_coding                     | 0.0182073 | 2.214 |
| SGCE          | protein_coding                     | 0.0001257 | 2.214 |
| SPTBN5        | protein_coding                     | 0.0095555 | 2.212 |
| TPT1-AS1      | lncRNA                             | 0.0067772 | 2.204 |
| ABHD6         | protein_coding                     | 0.0105986 | 2.204 |
| LERFS         | lncRNA                             | 0.0007586 | 2.202 |
| ABCC5         | protein_coding                     | 8.72E-05  | 2.200 |

|                |                |           |       |
|----------------|----------------|-----------|-------|
| CACNA2D1       | protein_coding | 0.0188869 | 2.200 |
| KSR1           | protein_coding | 0.0027684 | 2.198 |
| CLCN2          | protein_coding | 0.01093   | 2.197 |
| PPP1R12B       | protein_coding | 6.25E-05  | 2.196 |
| LINC00630      | lncRNA         | 0.0049037 | 2.196 |
| ELMOD2         | protein_coding | 0.0162844 | 2.194 |
| COL17A1        | protein_coding | 2.75E-05  | 2.191 |
| SLC39A11       | protein_coding | 0.0045074 | 2.182 |
| KCNC4          | protein_coding | 0.0001505 | 2.178 |
| TMEM161B-AS1   | lncRNA         | 6.84E-06  | 2.174 |
| LINC00894      | lncRNA         | 0.0182852 | 2.174 |
| FBN1           | protein_coding | 4.04E-05  | 2.173 |
| FBXL2          | protein_coding | 0.0045639 | 2.172 |
| EFCAB5         | protein_coding | 0.0276103 | 2.166 |
| PIGO           | protein_coding | 0.0209705 | 2.162 |
| MFAP3          | protein_coding | 0.0012955 | 2.161 |
| ELF3           | protein_coding | 0.0143076 | 2.160 |
| PBX1           | protein_coding | 3.15E-05  | 2.160 |
| CKMT2-AS1      | lncRNA         | 0.011858  | 2.160 |
| SEMA5A         | protein_coding | 0.0022305 | 2.159 |
| CCDC136        | protein_coding | 9.68E-05  | 2.158 |
| RPS6KA5        | protein_coding | 5.31E-05  | 2.153 |
| RAP1GAP        | protein_coding | 0.0218105 | 2.153 |
| TNC            | protein_coding | 5.43E-05  | 2.152 |
| VPS13B         | protein_coding | 9.79E-06  | 2.152 |
| NR4A2          | protein_coding | 0.0150461 | 2.149 |
| LINC02228      | lncRNA         | 0.0043105 | 2.147 |
| DCAF8          | protein_coding | 0.0036275 | 2.144 |
| PSEN2          | protein_coding | 0.039406  | 2.143 |
| CFAP58         | protein_coding | 0.0079148 | 2.138 |
| PLEKHH2        | protein_coding | 0.0010255 | 2.138 |
| RP11-1023L17.1 |                | 7.00E-05  | 2.134 |
| STXBP4         | protein_coding | 0.004224  | 2.131 |
| RELT           | protein_coding | 0.0100034 | 2.131 |
| FLRT2          | protein_coding | 3.28E-05  | 2.126 |
| FZD4           | protein_coding | 0.0166478 | 2.122 |
| ATXN7L2        | protein_coding | 0.0180578 | 2.114 |
| LTBP1          | protein_coding | 2.17E-05  | 2.114 |
| ERC2           | protein_coding | 0.032891  | 2.114 |
| GOLGA8B        | protein_coding | 0.0006142 | 2.103 |
| FJX1           | protein_coding | 0.0001778 | 2.100 |
| ENTPD1-AS1     | lncRNA         | 5.58E-05  | 2.100 |
| ANKRD36B       | protein_coding | 0.001955  | 2.100 |
| FAM72A         | protein_coding | 0.0194389 | 2.099 |
| FCGBP          | protein_coding | 0.007543  | 2.099 |
| CASP10         | protein_coding | 0.0216686 | 2.097 |

|               |                                    |           |       |
|---------------|------------------------------------|-----------|-------|
| GRIK4         | protein_coding                     | 0.0006877 | 2.096 |
| HECW2         | protein_coding                     | 5.33E-05  | 2.092 |
| B4GALNT3      | protein_coding                     | 0.0056794 | 2.091 |
| ZNF26         | protein_coding                     | 0.001121  | 2.091 |
| CELSR2        | protein_coding                     | 0.0024618 | 2.089 |
| NEBL          | protein_coding                     | 0.000113  | 2.088 |
| MAML3         | protein_coding                     | 0.0255512 | 2.083 |
| TOGARAM2      | protein_coding                     | 0.0111433 | 2.083 |
| RALGAPA1      | protein_coding                     | 0.0005828 | 2.082 |
| DIO2          | protein_coding                     | 0.0482952 | 2.080 |
| CCDC18-AS1    | lncRNA                             | 0.0141427 | 2.075 |
| PLEKHS1       | protein_coding                     | 0.0180198 | 2.074 |
| SLC38A7       | protein_coding                     | 0.0231663 | 2.072 |
| ZNF81         | protein_coding                     | 0.0044127 | 2.069 |
| SPRY4-AS1     | lncRNA                             | 0.010892  | 2.068 |
| INTU          | protein_coding                     | 0.001362  | 2.066 |
| AC025171.1    |                                    | 0.0405704 | 2.064 |
| MICAL3        | protein_coding                     | 1.28E-05  | 2.064 |
| CSF3R         | protein_coding                     | 0.0304239 | 2.063 |
| ENTPD3        | protein_coding                     | 0.0263752 | 2.062 |
| AC021218.2    |                                    | 0.0219152 | 2.059 |
| PTCH1         | protein_coding                     | 0.000467  | 2.051 |
| FAT4          | protein_coding                     | 3.77E-05  | 2.047 |
| TLR4          | protein_coding                     | 0.0064297 | 2.044 |
| CEP170P1      | transcribed_unprocessed_pseudogene | 0.0146731 | 2.043 |
| ITGA9-AS1     | lncRNA                             | 0.0002317 | 2.040 |
| ZNF44         | protein_coding                     | 0.0433054 | 2.039 |
| LAMA3         | protein_coding                     | 1.30E-05  | 2.039 |
| SYNE1         | protein_coding                     | 3.86E-08  | 2.039 |
| ILDR2         | protein_coding                     | 0.0010765 | 2.037 |
| USP35         | protein_coding                     | 0.0226852 | 2.032 |
| HHIP          | protein_coding                     | 0.0112833 | 2.031 |
| PPARGC1A      | protein_coding                     | 0.0110174 | 2.024 |
| SEMA3A        | protein_coding                     | 0.001842  | 2.022 |
| MFSD8         | protein_coding                     | 0.0260975 | 2.021 |
| CH507-513H4.9 |                                    | 0.0074563 | 2.017 |
| AMY2B         | protein_coding                     | 0.0304391 | 2.016 |
| PRR5L         | protein_coding                     | 0.0045707 | 2.009 |
| PCDHGB2       | protein_coding                     | 0.0121965 | 2.007 |
| SCN5A         | protein_coding                     | 0.0002064 | 2.006 |
| SNX14         | protein_coding                     | 0.0129254 | 2.005 |
| DUBR          | lncRNA                             | 0.0019994 | 2.002 |
| SLC35D1       | protein_coding                     | 0.0210995 | 2.002 |
| MIPOL1        | protein_coding                     | 0.0006216 | 2.002 |
| P4HA2         | protein_coding                     | 4.61E-05  | 1.999 |
| NPIP5         | protein_coding                     | 0.0062138 | 1.999 |



|             |                                    |           |       |
|-------------|------------------------------------|-----------|-------|
| EXPH5       | protein_coding                     | 4.30E-05  | 1.997 |
| CNNM2       | protein_coding                     | 0.0001408 | 1.992 |
| SNHG17      | lncRNA                             | 0.0003662 | 1.990 |
| COL12A1     | protein_coding                     | 1.49E-07  | 1.988 |
| LPAL2       | transcribed_unprocessed_pseudogene | 0.0298866 | 1.988 |
| ATP10A      | protein_coding                     | 0.0084156 | 1.983 |
| COBLL1      | protein_coding                     | 0.0023359 | 1.983 |
| XYLB        | protein_coding                     | 0.0133468 | 1.982 |
| CRACD       | protein_coding                     | 0.0180198 | 1.981 |
| ZNF619      | protein_coding                     | 0.0239645 | 1.981 |
| PAN2        | protein_coding                     | 0.0036829 | 1.980 |
| SEMA4C      | protein_coding                     | 0.0162116 | 1.978 |
| DPYSL3      | protein_coding                     | 0.0042418 | 1.975 |
| HEMK1       | protein_coding                     | 0.0064318 | 1.974 |
| LIAS        | protein_coding                     | 0.0114847 | 1.971 |
| AHI1        | protein_coding                     | 5.04E-05  | 1.968 |
| SAMD12      | protein_coding                     | 0.0006047 | 1.967 |
| ALPK1       | protein_coding                     | 0.0052927 | 1.966 |
| SLC11A2     | protein_coding                     | 0.0014955 | 1.964 |
| IL17RA      | protein_coding                     | 0.0033783 | 1.963 |
| DHODH       | protein_coding                     | 0.0300038 | 1.961 |
| MYO1D       | protein_coding                     | 0.0230625 | 1.961 |
| ZSCAN12     | protein_coding                     | 0.0005233 | 1.960 |
| CASC2       | lncRNA                             | 0.0012949 | 1.957 |
| MEIS2       | protein_coding                     | 0.0245156 | 1.955 |
| ZNF546      | protein_coding                     | 0.0293665 | 1.953 |
| SLC35A3     | protein_coding                     | 0.0014646 | 1.952 |
| NMNAT3      | protein_coding                     | 0.0071916 | 1.949 |
| GPAM        | protein_coding                     | 0.0114385 | 1.947 |
| CMTR2       | protein_coding                     | 0.0147667 | 1.946 |
| THSD4       | protein_coding                     | 0.0020929 | 1.945 |
| RBM48       | protein_coding                     | 0.0290655 | 1.945 |
| SYNJ1       | protein_coding                     | 0.0209144 | 1.944 |
| RP1-152L7.5 |                                    | 0.0211993 | 1.941 |
| UNC50       | protein_coding                     | 0.008478  | 1.939 |
| TMEM161B    | protein_coding                     | 0.0128143 | 1.937 |
| SDHA        | protein_coding                     | 0.0228293 | 1.935 |
| CCDC144B    | transcribed_unprocessed_pseudogene | 0.0073181 | 1.935 |
| LRR8C       | protein_coding                     | 0.0287711 | 1.935 |
| ZNF577      | protein_coding                     | 0.0009926 | 1.935 |
| CDKL1       | protein_coding                     | 0.0020265 | 1.933 |
| DGKA        | protein_coding                     | 0.007396  | 1.930 |
| TYW5        | protein_coding                     | 0.0143377 | 1.929 |
| ZSCAN16-AS1 | lncRNA                             | 0.0038804 | 1.928 |
| STARD9      | protein_coding                     | 1.18E-05  | 1.927 |
| KDM7A       | protein_coding                     | 0.000638  | 1.925 |

|               |                                    |           |       |
|---------------|------------------------------------|-----------|-------|
| GABPB1-AS1    | lncRNA                             | 0.0125552 | 1.925 |
| CRPPA         | protein_coding                     | 0.0213509 | 1.924 |
| COLGALT2      | protein_coding                     | 0.0460663 | 1.918 |
| ASTN2         | protein_coding                     | 0.0072718 | 1.917 |
| LINC00511     | lncRNA                             | 2.55E-06  | 1.917 |
| CLSTN3        | protein_coding                     | 0.0453517 | 1.917 |
| LEPR          | protein_coding                     | 0.0439487 | 1.916 |
| POMT2         | protein_coding                     | 0.0010887 | 1.915 |
| RP11-513I15.6 |                                    | 0.012331  | 1.913 |
| LNX1          | protein_coding                     | 0.049321  | 1.912 |
| GUSBP1        | transcribed_unprocessed_pseudogene | 0.0045562 | 1.909 |
| STON2         | protein_coding                     | 0.0463645 | 1.909 |
| DYNC2H1       | protein_coding                     | 0.0010372 | 1.906 |
| TTC21B        | protein_coding                     | 0.0002534 | 1.903 |
| TERF1         | protein_coding                     | 0.0012851 | 1.901 |
| ZSCAN31       | protein_coding                     | 0.001582  | 1.900 |
| DDX12P        | unprocessed_pseudogene             | 0.0212634 | 1.898 |
| CHST10        | protein_coding                     | 0.0166635 | 1.898 |
| GSAP          | protein_coding                     | 0.0274695 | 1.898 |
| STK36         | protein_coding                     | 0.0136636 | 1.898 |
| EML1          | protein_coding                     | 0.0152195 | 1.895 |
| PTPN13        | protein_coding                     | 0.0005229 | 1.893 |
| PIGN          | protein_coding                     | 0.0124515 | 1.889 |
| GAB1          | protein_coding                     | 0.006942  | 1.888 |
| RMDN2         | protein_coding                     | 0.0177531 | 1.888 |
| MBTPS2        | protein_coding                     | 0.0187571 | 1.887 |
| MALAT1        | lncRNA                             | 1.28E-63  | 1.887 |
| SEPTIN7-DT    | lncRNA                             | 0.0136289 | 1.881 |
| ENTPD3-AS1    | lncRNA                             | 0.0246898 | 1.880 |
| DNHD1         | protein_coding                     | 0.0001883 | 1.879 |
| FLG-AS1       | lncRNA                             | 0.0323807 | 1.879 |
| CPVL          | protein_coding                     | 0.031103  | 1.879 |
| ABCC10        | protein_coding                     | 0.0022394 | 1.876 |
| PTGER4        | protein_coding                     | 0.0351238 | 1.876 |
| ZNF224        | protein_coding                     | 0.0138226 | 1.876 |
| CPE           | protein_coding                     | 0.0464137 | 1.873 |
| NECTIN1       | protein_coding                     | 0.0097779 | 1.873 |
| PCNX1         | protein_coding                     | 5.68E-05  | 1.868 |
| LINC01505     | lncRNA                             | 0.0002077 | 1.868 |
| MATN2         | protein_coding                     | 0.007058  | 1.868 |
| ZC3H12A       | protein_coding                     | 0.0227861 | 1.864 |
| RTTN          | protein_coding                     | 0.0051493 | 1.862 |
| LGR4          | protein_coding                     | 0.0007451 | 1.859 |
| CCDC7         | protein_coding                     | 0.0009213 | 1.859 |
| COL7A1        | protein_coding                     | 0.0002278 | 1.857 |
| GEN1          | protein_coding                     | 0.0013158 | 1.855 |

|              |                                    |           |       |
|--------------|------------------------------------|-----------|-------|
| LRRC49       | protein_coding                     | 0.0410132 | 1.855 |
| PPP4R1L      | transcribed_unprocessed_pseudogene | 0.0027336 | 1.852 |
| USP13        | protein_coding                     | 0.0034081 | 1.850 |
| SH3PXD2B     | protein_coding                     | 0.0054628 | 1.848 |
| SLC22A5      | protein_coding                     | 0.0264283 | 1.847 |
| SLCO3A1      | protein_coding                     | 0.0244036 | 1.846 |
| DNAH2        | protein_coding                     | 3.76E-06  | 1.843 |
| PSD4         | protein_coding                     | 0.0305801 | 1.843 |
| CCT6B        | protein_coding                     | 0.0255592 | 1.842 |
| CDAN1        | protein_coding                     | 0.0254227 | 1.839 |
| DNM1         | protein_coding                     | 0.0095043 | 1.838 |
| INPP5B       | protein_coding                     | 0.0071425 | 1.838 |
| COL27A1      | protein_coding                     | 0.0100635 | 1.837 |
| GARS1-DT     | lncRNA                             | 5.69E-06  | 1.837 |
| HDAC8        | protein_coding                     | 0.0015399 | 1.836 |
| RP11-214O1.3 |                                    | 0.0476815 | 1.834 |
| CYP4V2       | protein_coding                     | 0.0067653 | 1.833 |
| ZNF827       | protein_coding                     | 3.06E-05  | 1.833 |
| ZNF250       | protein_coding                     | 0.0190657 | 1.832 |
| TMEM218      | protein_coding                     | 0.0034308 | 1.829 |
| LTBP3        | protein_coding                     | 0.0008283 | 1.828 |
| PGM2L1       | protein_coding                     | 0.0035246 | 1.827 |
| FGD4         | protein_coding                     | 0.0360088 | 1.827 |
| ASB3         | protein_coding                     | 0.0095159 | 1.826 |
| STIM2        | protein_coding                     | 0.0080536 | 1.826 |
| DNAJC18      | protein_coding                     | 0.0192971 | 1.825 |
| AP4S1        | protein_coding                     | 0.0399789 | 1.825 |
| ZNF431       | protein_coding                     | 0.006873  | 1.825 |
| ZNF440       | protein_coding                     | 0.0137983 | 1.823 |
| ZNF862       | protein_coding                     | 0.0045978 | 1.823 |
| ENTPD5       | protein_coding                     | 0.0018219 | 1.822 |
| RNFT2        | protein_coding                     | 0.033719  | 1.818 |
| ST3GAL6      | protein_coding                     | 0.0340859 | 1.814 |
| WWOX         | protein_coding                     | 0.0145186 | 1.813 |
| MTERF1       | protein_coding                     | 0.0393771 | 1.812 |
| MCC          | protein_coding                     | 0.0029274 | 1.811 |
| THAP6        | protein_coding                     | 0.0193524 | 1.809 |
| NEK11        | protein_coding                     | 0.0137776 | 1.808 |
| NOMO2        | protein_coding                     | 0.0097133 | 1.806 |
| COL6A3       | protein_coding                     | 0.0002204 | 1.804 |
| TAF1C        | protein_coding                     | 0.0468195 | 1.803 |
| FGF1         | protein_coding                     | 0.0332664 | 1.800 |
| KIDINS220    | protein_coding                     | 8.54E-07  | 1.799 |
| NFIA         | protein_coding                     | 1.07E-08  | 1.798 |
| SLC12A6      | protein_coding                     | 0.0382814 | 1.798 |
| ZNF704       | protein_coding                     | 0.0097236 | 1.797 |

|             |                                    |           |       |
|-------------|------------------------------------|-----------|-------|
| ATP6V0A4    | protein_coding                     | 0.0126916 | 1.793 |
| FIG4        | protein_coding                     | 0.003684  | 1.793 |
| SLC5A6      | protein_coding                     | 0.0485825 | 1.790 |
| JPH2        | protein_coding                     | 0.0145908 | 1.789 |
| IL1RAP      | protein_coding                     | 0.0104379 | 1.787 |
| CROCCP2     | transcribed_unprocessed_pseudogene | 0.0001383 | 1.786 |
| ITFG2       | protein_coding                     | 0.0089587 | 1.786 |
| KIAA1328    | protein_coding                     | 0.0019309 | 1.786 |
| ZNF200      | protein_coding                     | 0.0100194 | 1.785 |
| IL31RA      | protein_coding                     | 0.0043875 | 1.776 |
| ACAD10      | protein_coding                     | 0.0253104 | 1.775 |
| GPR161      | protein_coding                     | 0.0038344 | 1.774 |
| RAP1GAP2    | protein_coding                     | 0.0138226 | 1.773 |
| FOSB        | protein_coding                     | 0.0074468 | 1.770 |
| COL4A1      | protein_coding                     | 0.0036668 | 1.768 |
| ICA1        | protein_coding                     | 0.0393518 | 1.767 |
| PDE4D       | protein_coding                     | 0.0007681 | 1.766 |
| HEXA        | protein_coding                     | 0.0099385 | 1.763 |
| SYTL2       | protein_coding                     | 0.0003518 | 1.762 |
| ACVR1       | protein_coding                     | 0.0183261 | 1.759 |
| ZFYVE16     | protein_coding                     | 0.0020493 | 1.758 |
| SNORD3C     | snoRNA                             | 0.0004117 | 1.754 |
| ZNF736      | protein_coding                     | 0.0291501 | 1.753 |
| DTNB        | protein_coding                     | 0.0203852 | 1.751 |
| NF1         | protein_coding                     | 2.55E-05  | 1.751 |
| SLC9A8      | protein_coding                     | 0.0205606 | 1.745 |
| ZNF248      | protein_coding                     | 0.0309136 | 1.745 |
| FOXP1       | protein_coding                     | 0.0006418 | 1.743 |
| ZNF518A     | protein_coding                     | 0.0080421 | 1.742 |
| ATP6V0A2    | protein_coding                     | 0.0023034 | 1.742 |
| SQLE        | protein_coding                     | 0.0118278 | 1.740 |
| ZNF605      | protein_coding                     | 0.015005  | 1.737 |
| BDH2        | protein_coding                     | 0.0499258 | 1.737 |
| EXT2        | protein_coding                     | 8.59E-05  | 1.737 |
| CEP126      | protein_coding                     | 0.0140524 | 1.733 |
| DISP1       | protein_coding                     | 0.0025801 | 1.725 |
| P2RY6       | protein_coding                     | 0.0223089 | 1.722 |
| CTC-260E6.6 |                                    | 0.0230412 | 1.721 |
| ZNF276      | protein_coding                     | 0.019065  | 1.720 |
| KIAA1109    | protein_coding                     | 5.26E-07  | 1.720 |
| SMYD4       | protein_coding                     | 0.0364672 | 1.719 |
| GCNT1       | protein_coding                     | 0.0006203 | 1.719 |
| GALNT6      | protein_coding                     | 0.0189957 | 1.718 |
| ATP6V0A1    | protein_coding                     | 0.0097236 | 1.717 |
| XXYL1       | protein_coding                     | 0.0042412 | 1.716 |
| PVT1        | lncRNA                             | 1.44E-05  | 1.714 |

|               |                                    |           |       |
|---------------|------------------------------------|-----------|-------|
| MAST4         | protein_coding                     | 8.24E-06  | 1.714 |
| OSBPL6        | protein_coding                     | 0.0229882 | 1.714 |
| SPEG          | protein_coding                     | 0.0169273 | 1.713 |
| AMMECR1L      | protein_coding                     | 0.0021321 | 1.708 |
| CLCN6         | protein_coding                     | 0.0016693 | 1.708 |
| KNDC1         | protein_coding                     | 0.0255981 | 1.707 |
| NEAT1         | lncRNA                             | 4.71E-08  | 1.707 |
| ZFHX4         | protein_coding                     | 0.0007849 | 1.704 |
| TRMT11        | protein_coding                     | 0.0211534 | 1.703 |
| SLC5A3        | protein_coding                     | 0.0158989 | 1.702 |
| CCDC57        | protein_coding                     | 1.90E-05  | 1.702 |
| TRIM22        | protein_coding                     | 0.022386  | 1.701 |
| B4GALT6       | protein_coding                     | 0.0164996 | 1.701 |
| B4GALT4       | protein_coding                     | 0.033566  | 1.701 |
| AK9           | protein_coding                     | 0.0118126 | 1.698 |
| FOXP2         | protein_coding                     | 0.0310254 | 1.698 |
| RALGAPA2      | protein_coding                     | 0.0109362 | 1.697 |
| HMMR          | protein_coding                     | 0.0304391 | 1.696 |
| SLC9A6        | protein_coding                     | 0.0134765 | 1.696 |
| TNRC6C        | protein_coding                     | 1.15E-05  | 1.693 |
| NRDE2         | protein_coding                     | 0.0004824 | 1.692 |
| SZT2          | protein_coding                     | 5.43E-06  | 1.691 |
| IFTAP         | protein_coding                     | 0.0031391 | 1.691 |
| FANCC         | protein_coding                     | 0.0130633 | 1.688 |
| FAM20C        | protein_coding                     | 8.77E-06  | 1.688 |
| TM2D1         | protein_coding                     | 0.0164204 | 1.686 |
| SEL1L         | protein_coding                     | 2.50E-05  | 1.685 |
| GMDS-DT       | lncRNA                             | 8.71E-06  | 1.683 |
| INSR          | protein_coding                     | 0.0021522 | 1.682 |
| POMT1         | protein_coding                     | 0.0027915 | 1.680 |
| TSPOAP1       | protein_coding                     | 0.008478  | 1.679 |
| MMACHC        | protein_coding                     | 0.0409178 | 1.675 |
| ZNF397        | protein_coding                     | 0.0300585 | 1.673 |
| CTD-2368P22.1 |                                    | 0.0401325 | 1.670 |
| FST           | protein_coding                     | 0.0118892 | 1.670 |
| GALNT5        | protein_coding                     | 0.0019342 | 1.669 |
| PIK3C2B       | protein_coding                     | 0.0143697 | 1.664 |
| SEPTIN7P14    | transcribed_unprocessed_pseudogene | 0.0281536 | 1.663 |
| ZSCAN9        | protein_coding                     | 0.0449391 | 1.663 |
| SCAI          | protein_coding                     | 0.0122202 | 1.662 |
| MTBP          | protein_coding                     | 0.0245801 | 1.662 |
| LINC01006     | lncRNA                             | 0.0016086 | 1.662 |
| MAPK8IP3      | protein_coding                     | 1.18E-05  | 1.657 |
| GNAI1         | protein_coding                     | 0.0004341 | 1.656 |
| ALG14         | protein_coding                     | 0.0107991 | 1.655 |
| DNM3          | protein_coding                     | 0.0484374 | 1.652 |

|               |                                    |           |       |
|---------------|------------------------------------|-----------|-------|
| MEF2C         | protein_coding                     | 0.0043615 | 1.652 |
| IGFBP1        | protein_coding                     | 0.0137718 | 1.651 |
| SPG7          | protein_coding                     | 2.94E-06  | 1.651 |
| KCNAB2        | protein_coding                     | 0.0273973 | 1.649 |
| TMTC3         | protein_coding                     | 0.0273584 | 1.649 |
| EGR1          | protein_coding                     | 1.35E-05  | 1.648 |
| SLC35B4       | protein_coding                     | 0.0080894 | 1.646 |
| NBEA          | protein_coding                     | 0.0030503 | 1.645 |
| SLC25A12      | protein_coding                     | 0.0479778 | 1.644 |
| TSGA10        | protein_coding                     | 0.0292085 | 1.639 |
| TMEM87B       | protein_coding                     | 0.0278197 | 1.638 |
| STRIP2        | protein_coding                     | 0.0055856 | 1.637 |
| URB1          | protein_coding                     | 0.0005263 | 1.637 |
| MROH8         | protein_coding                     | 0.0355803 | 1.636 |
| LCLAT1        | protein_coding                     | 0.0266469 | 1.635 |
| B3GALT5       | protein_coding                     | 0.0005208 | 1.631 |
| COL13A1       | protein_coding                     | 0.0001331 | 1.630 |
| CAMK4         | protein_coding                     | 0.0270831 | 1.629 |
| CEP85L        | protein_coding                     | 0.0486935 | 1.629 |
| PRDM15        | protein_coding                     | 0.0025078 | 1.628 |
| IQCG          | protein_coding                     | 0.0047569 | 1.628 |
| KIAA1217      | protein_coding                     | 1.03E-10  | 1.628 |
| CENATAC       | protein_coding                     | 0.0227861 | 1.627 |
| LNPEP         | protein_coding                     | 0.0019952 | 1.627 |
| NIPAL1        | protein_coding                     | 0.0486935 | 1.624 |
| KCNQ5         | protein_coding                     | 0.0007786 | 1.624 |
| CTD-2366F13.1 |                                    | 0.0469952 | 1.623 |
| CCDC146       | protein_coding                     | 0.0452717 | 1.622 |
| JRK           | protein_coding                     | 0.0351703 | 1.620 |
| TICRR         | protein_coding                     | 0.0026171 | 1.619 |
| ADGRL2        | protein_coding                     | 0.0025219 | 1.619 |
| SCARB2        | protein_coding                     | 8.53E-05  | 1.618 |
| KLC1          | protein_coding                     | 0.0017327 | 1.612 |
| DZIP3         | protein_coding                     | 0.0032922 | 1.611 |
| SLC37A3       | protein_coding                     | 0.0029942 | 1.609 |
| PRCP          | protein_coding                     | 1.18E-05  | 1.609 |
| MFSD14A       | protein_coding                     | 0.0312205 | 1.609 |
| DDR2          | protein_coding                     | 0.0399232 | 1.609 |
| PPFIBP2       | protein_coding                     | 0.0045356 | 1.609 |
| FLI1          | protein_coding                     | 0.0182791 | 1.608 |
| PHKA2         | protein_coding                     | 0.0087493 | 1.606 |
| MT-ND6        | protein_coding                     | 0.0004759 | 1.603 |
| ARAP2         | protein_coding                     | 0.0185829 | 1.603 |
| ZRANB3        | protein_coding                     | 0.0408197 | 1.602 |
| EP400P1       | transcribed_unprocessed_pseudogene | 0.0346973 | 1.601 |
| ATP8B1        | protein_coding                     | 0.0397305 | 1.598 |

|              |                      |           |       |
|--------------|----------------------|-----------|-------|
| RP11-384K6.6 |                      | 0.0486103 | 1.595 |
| RFX3         | protein_coding       | 0.0416672 | 1.595 |
| LIPG         | protein_coding       | 0.0069133 | 1.595 |
| SCYL3        | protein_coding       | 0.0360547 | 1.591 |
| PTPRE        | protein_coding       | 0.0122716 | 1.590 |
| ARSJ         | protein_coding       | 0.0211398 | 1.587 |
| TTF2         | protein_coding       | 0.0008921 | 1.586 |
| WDR19        | protein_coding       | 0.013871  | 1.585 |
| DNAJC16      | protein_coding       | 0.0077223 | 1.585 |
| PABPN1       | protein_coding       | 0.0026746 | 1.582 |
| BICD1        | protein_coding       | 0.0158989 | 1.579 |
| WDR59        | protein_coding       | 0.0342688 | 1.578 |
| CHST2        | protein_coding       | 0.0184062 | 1.576 |
| LARS2        | protein_coding       | 0.0012417 | 1.574 |
| ADGRG6       | protein_coding       | 0.0235878 | 1.573 |
| THADA        | protein_coding       | 0.0016101 | 1.571 |
| LRRC27       | protein_coding       | 0.0087402 | 1.571 |
| FOS          | protein_coding       | 0.0033087 | 1.571 |
| WNK3         | protein_coding       | 0.0259326 | 1.567 |
| ATP8B3       | protein_coding       | 0.0367322 | 1.566 |
| ZNF354C      | protein_coding       | 0.0190657 | 1.560 |
| SUCLG2-AS1   | lncRNA               | 0.0158127 | 1.557 |
| LINC02609    | lncRNA               | 0.0456149 | 1.556 |
| RRBP1        | protein_coding       | 3.76E-19  | 1.553 |
| MCM9         | protein_coding       | 0.0319194 | 1.549 |
| ERAP1        | protein_coding       | 0.001143  | 1.547 |
| RSRP1        | protein_coding       | 0.0032313 | 1.546 |
| CTC1         | protein_coding       | 0.0401763 | 1.544 |
| NLRC5        | protein_coding       | 0.0041344 | 1.544 |
| SNX29        | protein_coding       | 0.0134244 | 1.544 |
| LPIN3        | protein_coding       | 0.0158777 | 1.544 |
| RP11-796E2.4 |                      | 0.0213606 | 1.541 |
| G2E3         | protein_coding       | 0.0048042 | 1.541 |
| CDON         | protein_coding       | 0.0156326 | 1.541 |
| LHFPL6       | protein_coding       | 0.0253764 | 1.534 |
| ACSS3        | protein_coding       | 0.0323811 | 1.529 |
| CHST12       | protein_coding       | 0.0105724 | 1.525 |
| IFT172       | protein_coding       | 0.0006338 | 1.520 |
| CFAP251      | protein_coding       | 0.013964  | 1.518 |
| ARHGAP26     | protein_coding       | 0.0001598 | 1.518 |
| RASD1        | protein_coding       | 0.0103285 | 1.517 |
| RP1L1        | protein_coding       | 0.0463858 | 1.516 |
| SLC1A4       | protein_coding       | 0.0399789 | 1.514 |
| PRDM10       | protein_coding       | 0.004106  | 1.511 |
| NOS1AP       | protein_coding       | 0.0216112 | 1.509 |
| FAM3C2P      | processed_pseudogene | 0.0117985 | 1.507 |

|           |                                    |           |       |
|-----------|------------------------------------|-----------|-------|
| ZMYM2     | protein_coding                     | 0.0191615 | 1.507 |
| ST3GAL1   | protein_coding                     | 0.0031845 | 1.504 |
| CTSL      | protein_coding                     | 1.39E-05  | 1.500 |
| PIK3R1    | protein_coding                     | 0.0062018 | 1.500 |
| MPP3      | protein_coding                     | 0.0384835 | 1.500 |
| NDC1      | protein_coding                     | 0.0158777 | 1.499 |
| SEMA3B    | protein_coding                     | 0.0359917 | 1.498 |
| TMX3      | protein_coding                     | 0.0396838 | 1.496 |
| DNAJB14   | protein_coding                     | 0.0013158 | 1.496 |
| KIFAP3    | protein_coding                     | 0.0096769 | 1.495 |
| NCSTN     | protein_coding                     | 0.0070097 | 1.494 |
| GK5       | protein_coding                     | 0.042033  | 1.494 |
| TBXAS1    | protein_coding                     | 0.022048  | 1.493 |
| MMP1      | protein_coding                     | 0.0117451 | 1.492 |
| PHGDH     | protein_coding                     | 0.0228895 | 1.491 |
| SNAPC4    | protein_coding                     | 0.0011528 | 1.490 |
| FKTN      | protein_coding                     | 0.003305  | 1.490 |
| TRIM2     | protein_coding                     | 0.0473835 | 1.485 |
| PLEKHM1P1 | transcribed_unprocessed_pseudogene | 0.044014  | 1.485 |
| CUL9      | protein_coding                     | 8.32E-05  | 1.484 |
| SCARB1    | protein_coding                     | 0.0336083 | 1.484 |
| TYW1      | protein_coding                     | 0.0130015 | 1.483 |
| TMEM185B  | protein_coding                     | 0.0231281 | 1.483 |
| INCENP    | protein_coding                     | 5.12E-23  | 1.482 |
| ZBED5     | protein_coding                     | 0.0367071 | 1.482 |
| MGAT2     | protein_coding                     | 2.21E-05  | 1.482 |
| ZDHHC17   | protein_coding                     | 0.0473098 | 1.481 |
| TMEM63B   | protein_coding                     | 0.0026736 | 1.479 |
| ATAD2B    | protein_coding                     | 0.0199608 | 1.478 |
| DOCK2     | protein_coding                     | 0.0011625 | 1.477 |
| MLH3      | protein_coding                     | 0.0262605 | 1.474 |
| F2RL1     | protein_coding                     | 0.0015204 | 1.469 |
| BRD9      | protein_coding                     | 1.52E-08  | 1.467 |
| DTWD1     | protein_coding                     | 0.0266469 | 1.466 |
| MOCS1     | protein_coding                     | 0.0254172 | 1.465 |
| KIAA1549  | protein_coding                     | 0.0037037 | 1.465 |
| LDLR      | protein_coding                     | 3.35E-16  | 1.462 |
| NR3C2     | protein_coding                     | 0.0421562 | 1.461 |
| LBR       | protein_coding                     | 0.0002508 | 1.459 |
| CREBZF    | protein_coding                     | 0.000742  | 1.459 |
| NBPF12    | protein_coding                     | 0.0078716 | 1.458 |
| ZFYVE26   | protein_coding                     | 8.59E-05  | 1.457 |
| METTL22   | protein_coding                     | 0.0486584 | 1.452 |
| TCP11L2   | protein_coding                     | 0.0478652 | 1.452 |
| GCNT2     | protein_coding                     | 4.38E-06  | 1.449 |
| TPM2      | protein_coding                     | 0.0043952 | 1.448 |



|              |                |           |       |
|--------------|----------------|-----------|-------|
| CCNL1        | protein_coding | 0.0202244 | 1.446 |
| ATF3         | protein_coding | 0.0006483 | 1.446 |
| LTO1         | protein_coding | 0.0458951 | 1.445 |
| ULK4         | protein_coding | 0.0089754 | 1.443 |
| ALG5         | protein_coding | 0.0238053 | 1.443 |
| GS1-124K5.12 |                | 0.0289097 | 1.443 |
| BTD          | protein_coding | 0.0386875 | 1.442 |
| ATP6AP2      | protein_coding | 0.0018412 | 1.442 |
| BDNF         | protein_coding | 0.0006041 | 1.440 |
| ZNF528-AS1   | lncRNA         | 0.0423394 | 1.439 |
| ERCC8        | protein_coding | 0.0013046 | 1.438 |
| FAM13A       | protein_coding | 0.0069087 | 1.435 |
| C2CD2L       | protein_coding | 0.0224038 | 1.435 |
| ATRN         | protein_coding | 0.0028026 | 1.427 |
| LRSAM1       | protein_coding | 0.0020518 | 1.426 |
| PRDM11       | protein_coding | 0.0270993 | 1.426 |
| POMK         | protein_coding | 0.033566  | 1.425 |
| BTBD9        | protein_coding | 0.0104069 | 1.423 |
| HMBOX1       | protein_coding | 0.0308228 | 1.423 |
| FUCA1        | protein_coding | 0.0259326 | 1.422 |
| DEPDC1B      | protein_coding | 0.0049399 | 1.419 |
| COQ8B        | protein_coding | 0.0452644 | 1.418 |
| DNMT3B       | protein_coding | 0.0417464 | 1.417 |
| CTNND1       | protein_coding | 0.0161017 | 1.416 |
| LRP12        | protein_coding | 0.0461594 | 1.416 |
| CEP57L1      | protein_coding | 0.033566  | 1.414 |
| LUCAT1       | lncRNA         | 0.0242589 | 1.409 |
| PCBP1-AS1    | lncRNA         | 0.0004169 | 1.406 |
| HKDC1        | protein_coding | 0.0171279 | 1.406 |
| TRAF1        | protein_coding | 0.0287333 | 1.406 |
| NBEAL1       | protein_coding | 0.0051379 | 1.405 |
| ATR          | protein_coding | 0.005977  | 1.405 |
| VPS13D       | protein_coding | 3.89E-05  | 1.404 |
| MIA3         | protein_coding | 0.0002877 | 1.404 |
| C20orf194    | protein_coding | 0.0461781 | 1.401 |
| ROBO4        | protein_coding | 0.0152991 | 1.401 |
| SETD4        | protein_coding | 0.0368965 | 1.399 |
| IL4R         | protein_coding | 0.027907  | 1.398 |
| SRGAP1       | protein_coding | 0.0008806 | 1.397 |
| TRAF5        | protein_coding | 0.0486416 | 1.395 |
| UTP20        | protein_coding | 0.0012169 | 1.394 |
| HYOU1        | protein_coding | 1.20E-12  | 1.393 |
| WDR47        | protein_coding | 0.0410691 | 1.392 |
| ZNF333       | protein_coding | 0.0176241 | 1.389 |
| KIF24        | protein_coding | 0.0275618 | 1.389 |
| FAM135A      | protein_coding | 0.0173378 | 1.387 |

|          |                                    |           |       |
|----------|------------------------------------|-----------|-------|
| EEA1     | protein_coding                     | 3.81E-05  | 1.387 |
| CROCC    | protein_coding                     | 0.0140333 | 1.387 |
| DSE      | protein_coding                     | 0.0247071 | 1.387 |
| FAM126B  | protein_coding                     | 0.0382574 | 1.385 |
| UBR3     | protein_coding                     | 0.039406  | 1.383 |
| NOTCH2   | protein_coding                     | 2.36E-07  | 1.382 |
| TSPAN3   | protein_coding                     | 0.0006062 | 1.381 |
| POR      | protein_coding                     | 0.0084038 | 1.380 |
| CTSC     | protein_coding                     | 0.0056692 | 1.376 |
| RHBDF2   | protein_coding                     | 0.0121565 | 1.375 |
| BCAS3    | protein_coding                     | 0.0332994 | 1.374 |
| ABCB9    | protein_coding                     | 0.0345811 | 1.373 |
| DMXL1    | protein_coding                     | 0.0202131 | 1.370 |
| UGGT1    | protein_coding                     | 0.0008367 | 1.370 |
| ZNF394   | protein_coding                     | 0.008801  | 1.367 |
| MX2      | protein_coding                     | 0.0196196 | 1.364 |
| TRPS1    | protein_coding                     | 0.0247442 | 1.361 |
| FZD6     | protein_coding                     | 0.025432  | 1.358 |
| MESD     | protein_coding                     | 0.0332478 | 1.357 |
| KLHDC4   | protein_coding                     | 0.0094992 | 1.356 |
| ITPR2    | protein_coding                     | 0.0007956 | 1.355 |
| DHX57    | protein_coding                     | 0.0119264 | 1.354 |
| MFSD14C  | transcribed_unprocessed_pseudogene | 0.0230412 | 1.351 |
| DDX60L   | protein_coding                     | 0.0054669 | 1.351 |
| EXOC6    | protein_coding                     | 0.0423689 | 1.348 |
| TRAPPC9  | protein_coding                     | 0.0251128 | 1.343 |
| ADAMTS6  | protein_coding                     | 0.0442045 | 1.342 |
| ATP10D   | protein_coding                     | 0.0076691 | 1.341 |
| CBX4     | protein_coding                     | 0.0002272 | 1.341 |
| SC5D     | protein_coding                     | 0.0145908 | 1.339 |
| NLRP1    | protein_coding                     | 0.0117747 | 1.339 |
| ATAD1    | protein_coding                     | 0.029646  | 1.339 |
| PLB1     | protein_coding                     | 0.0403082 | 1.337 |
| MIR100HG | lncRNA                             | 0.0002382 | 1.336 |
| CPT1A    | protein_coding                     | 0.0330972 | 1.335 |
| LMO7     | protein_coding                     | 2.03E-05  | 1.334 |
| CEPT1    | protein_coding                     | 0.0490894 | 1.333 |
| MAP2     | protein_coding                     | 0.0332487 | 1.332 |
| PLXNA2   | protein_coding                     | 0.0026989 | 1.332 |
| KDM4A    | protein_coding                     | 0.0213509 | 1.330 |
| CANT1    | protein_coding                     | 5.84E-05  | 1.328 |
| PEAK1    | protein_coding                     | 0.0052645 | 1.328 |
| AKAP9    | protein_coding                     | 2.55E-06  | 1.327 |
| TIAM2    | protein_coding                     | 0.0181019 | 1.327 |
| ALS2     | protein_coding                     | 0.0040972 | 1.326 |
| PTPRM    | protein_coding                     | 0.000559  | 1.326 |

|           |                |           |       |
|-----------|----------------|-----------|-------|
| LINC00261 | lncRNA         | 0.031317  | 1.326 |
| NOTCH1    | protein_coding | 0.0001587 | 1.323 |
| TRANK1    | protein_coding | 0.0230711 | 1.322 |
| ATG2B     | protein_coding | 0.0034336 | 1.322 |
| ZFAT      | protein_coding | 0.0076606 | 1.321 |
| LINC00963 | lncRNA         | 0.0188644 | 1.320 |
| LMLN      | protein_coding | 0.0343186 | 1.319 |
| STK33     | protein_coding | 0.0436691 | 1.319 |
| F2R       | protein_coding | 0.0430409 | 1.317 |
| SFXN5     | protein_coding | 0.0249609 | 1.315 |
| VPS13A    | protein_coding | 0.0043155 | 1.314 |
| ITGAV     | protein_coding | 0.0299013 | 1.312 |
| ZNF398    | protein_coding | 0.0049734 | 1.308 |
| OSER1-DT  | lncRNA         | 0.0483049 | 1.305 |
| GNPTAB    | protein_coding | 0.0425454 | 1.305 |
| SUN2      | protein_coding | 0.0065106 | 1.304 |
| TMEM63A   | protein_coding | 0.0183792 | 1.303 |
| RABGAP1L  | protein_coding | 0.0017985 | 1.301 |
| LINC01322 | lncRNA         | 0.0036482 | 1.300 |
| PRKCE     | protein_coding | 0.0102849 | 1.299 |
| SYNE2     | protein_coding | 4.45E-08  | 1.298 |
| CLCC1     | protein_coding | 0.0488547 | 1.296 |
| PCSK7     | protein_coding | 0.0018922 | 1.295 |
| PXDN      | protein_coding | 9.50E-05  | 1.290 |
| CREBRF    | protein_coding | 0.0065929 | 1.289 |
| SLC8B1    | protein_coding | 0.014045  | 1.289 |
| SLX4      | protein_coding | 0.0228064 | 1.289 |
| C2CD3     | protein_coding | 0.0003061 | 1.287 |
| PIGG      | protein_coding | 0.0098289 | 1.282 |
| NAV2      | protein_coding | 2.97E-12  | 1.282 |
| VANGL1    | protein_coding | 0.0025219 | 1.281 |
| ESPL1     | protein_coding | 0.0210475 | 1.281 |
| PKD1      | protein_coding | 0.0130922 | 1.281 |
| SLC3A2    | protein_coding | 1.40E-06  | 1.281 |
| INO80D    | protein_coding | 0.0139426 | 1.278 |
| HSP90B1   | protein_coding | 3.84E-20  | 1.276 |
| BRPF1     | protein_coding | 0.0007758 | 1.275 |
| MBD5      | protein_coding | 0.0289013 | 1.275 |
| CC2D2A    | protein_coding | 0.0259282 | 1.275 |
| ZNF331    | protein_coding | 0.0155556 | 1.274 |
| CHD6      | protein_coding | 4.23E-08  | 1.267 |
| HIVEP1    | protein_coding | 0.0012049 | 1.266 |
| PLCE1     | protein_coding | 0.0249609 | 1.263 |
| COL8A1    | protein_coding | 0.0276543 | 1.260 |
| UBN2      | protein_coding | 0.0141427 | 1.260 |
| IGHMBP2   | protein_coding | 0.0308227 | 1.256 |

|           |                |           |       |
|-----------|----------------|-----------|-------|
| SNORA73B  | snoRNA         | 4.83E-06  | 1.256 |
| SLC35F5   | protein_coding | 0.0143441 | 1.254 |
| DSG2      | protein_coding | 0.0300038 | 1.251 |
| HSPA5     | protein_coding | 2.90E-11  | 1.248 |
| LMBR1     | protein_coding | 0.0268698 | 1.247 |
| C6orf89   | protein_coding | 0.0068994 | 1.247 |
| NPHP4     | protein_coding | 0.0204683 | 1.244 |
| ADCY9     | protein_coding | 0.0299833 | 1.244 |
| FANCD2    | protein_coding | 0.0225011 | 1.241 |
| WLS       | protein_coding | 0.0410501 | 1.239 |
| ERBB2     | protein_coding | 0.0100667 | 1.239 |
| BICD2     | protein_coding | 7.43E-05  | 1.238 |
| PLOD3     | protein_coding | 0.0171353 | 1.236 |
| SYVN1     | protein_coding | 0.0194774 | 1.236 |
| HECTD4    | protein_coding | 0.0001218 | 1.235 |
| CCDC88C   | protein_coding | 0.000886  | 1.233 |
| DOCK4     | protein_coding | 0.0143652 | 1.232 |
| SLC7A11   | protein_coding | 0.0176596 | 1.232 |
| TSPYL2    | protein_coding | 0.002943  | 1.232 |
| PKD2      | protein_coding | 0.018521  | 1.229 |
| PCNX2     | protein_coding | 0.0191612 | 1.228 |
| CARD8     | protein_coding | 0.0060991 | 1.226 |
| CARMIL1   | protein_coding | 0.0137801 | 1.225 |
| ADAM9     | protein_coding | 6.12E-07  | 1.225 |
| TNFAIP8L1 | protein_coding | 0.0273584 | 1.223 |
| ARL6IP1   | protein_coding | 0.000601  | 1.222 |
| ADAM10    | protein_coding | 0.0009896 | 1.220 |
| KIAA2013  | protein_coding | 0.0004203 | 1.220 |
| POU2F1    | protein_coding | 0.0204931 | 1.217 |
| SASH1     | protein_coding | 0.032715  | 1.214 |
| OSMR      | protein_coding | 0.0127467 | 1.214 |
| CSPP1     | protein_coding | 0.0037275 | 1.214 |
| NEGR1     | protein_coding | 0.0438508 | 1.214 |
| XPR1      | protein_coding | 0.0349014 | 1.213 |
| LRP8      | protein_coding | 0.0269818 | 1.210 |
| CEP350    | protein_coding | 7.39E-06  | 1.209 |
| SOGA1     | protein_coding | 4.60E-06  | 1.207 |
| ERLIN1    | protein_coding | 0.0162689 | 1.207 |
| GPATCH2L  | protein_coding | 0.000754  | 1.206 |
| PLEKHA1   | protein_coding | 0.0362648 | 1.205 |
| IGF2R     | protein_coding | 5.01E-05  | 1.203 |
| UBR1      | protein_coding | 0.0392783 | 1.203 |
| TRAF2     | protein_coding | 0.020452  | 1.202 |
| RN7SKP203 | misc_RNA       | 0.0007836 | 1.202 |
| NKTR      | protein_coding | 0.0002704 | 1.201 |
| ZSWIM8    | protein_coding | 0.0126175 | 1.200 |

|           |                |           |       |
|-----------|----------------|-----------|-------|
| PIEZO1    | protein_coding | 5.98E-06  | 1.200 |
| GCLC      | protein_coding | 0.0177596 | 1.196 |
| DMXL2     | protein_coding | 0.0498097 | 1.193 |
| CHST3     | protein_coding | 0.0335268 | 1.190 |
| COL4A2    | protein_coding | 0.0026165 | 1.190 |
| SPTLC2    | protein_coding | 0.0343996 | 1.189 |
| RBM47     | protein_coding | 0.0065804 | 1.189 |
| FZD7      | protein_coding | 0.0182071 | 1.188 |
| RBM19     | protein_coding | 5.36E-05  | 1.188 |
| ILVBL     | protein_coding | 0.0466363 | 1.188 |
| GALNT2    | protein_coding | 0.000559  | 1.185 |
| EMC1      | protein_coding | 0.013286  | 1.180 |
| BAHCC1    | protein_coding | 0.0279864 | 1.180 |
| PHLDB1    | protein_coding | 0.0001674 | 1.179 |
| PRKRIP1   | protein_coding | 0.0277008 | 1.178 |
| FNIP2     | protein_coding | 0.0331042 | 1.178 |
| TSPAN14   | protein_coding | 0.0190891 | 1.176 |
| LIFR      | protein_coding | 0.0187927 | 1.176 |
| ABCC3     | protein_coding | 0.0190012 | 1.171 |
| CDKN2D    | protein_coding | 0.0202244 | 1.168 |
| CCNL2     | protein_coding | 0.0111433 | 1.166 |
| JADE1     | protein_coding | 0.0100975 | 1.165 |
| HEATR1    | protein_coding | 0.0379262 | 1.160 |
| PIM3      | protein_coding | 0.0337676 | 1.158 |
| ICAM1     | protein_coding | 0.0418968 | 1.156 |
| ZNF160    | protein_coding | 0.0274695 | 1.156 |
| ADGRA3    | protein_coding | 0.0151466 | 1.155 |
| LRP1      | protein_coding | 0.0208363 | 1.149 |
| LAPTM4A   | protein_coding | 0.0421435 | 1.148 |
| ZBTB40    | protein_coding | 0.0077629 | 1.148 |
| SIL1      | protein_coding | 0.0426052 | 1.147 |
| ATL2      | protein_coding | 0.0055856 | 1.145 |
| NR2F1-AS1 | lncRNA         | 0.0229483 | 1.145 |
| KIF18A    | protein_coding | 0.0056164 | 1.145 |
| ROR1      | protein_coding | 0.0206769 | 1.144 |
| ASPM      | protein_coding | 3.73E-06  | 1.142 |
| STT3A     | protein_coding | 0.002679  | 1.142 |
| BPNT2     | protein_coding | 0.0185525 | 1.141 |
| NFE2L3    | protein_coding | 0.0086267 | 1.136 |
| TNKS1BP1  | protein_coding | 0.0023939 | 1.135 |
| CLASP2    | protein_coding | 0.0084703 | 1.130 |
| DDHD1     | protein_coding | 0.0162479 | 1.129 |
| KIF14     | protein_coding | 5.93E-05  | 1.128 |
| VPS8      | protein_coding | 0.0254815 | 1.127 |
| DNAH14    | protein_coding | 0.0032031 | 1.125 |
| HRH1      | protein_coding | 0.0365045 | 1.124 |

|         |                |           |       |
|---------|----------------|-----------|-------|
| AP1AR   | protein_coding | 0.029646  | 1.123 |
| ATP11A  | protein_coding | 0.0129196 | 1.123 |
| PLEKHO1 | protein_coding | 0.01568   | 1.123 |
| DENND2B | protein_coding | 0.0300903 | 1.122 |
| CLSTN1  | protein_coding | 9.29E-05  | 1.121 |
| ZNF202  | protein_coding | 0.0314547 | 1.120 |
| CDH11   | protein_coding | 0.0046274 | 1.118 |
| PCNX4   | protein_coding | 0.0002424 | 1.118 |
| UXS1    | protein_coding | 0.0051863 | 1.116 |
| EPB41   | protein_coding | 0.0070076 | 1.114 |
| SHANK2  | protein_coding | 0.0146648 | 1.112 |
| SLC7A5  | protein_coding | 6.53E-05  | 1.111 |
| STARD8  | protein_coding | 0.0228367 | 1.109 |
| TTC17   | protein_coding | 0.0070335 | 1.106 |
| RGS3    | protein_coding | 0.0026116 | 1.106 |
| SPPL3   | protein_coding | 0.0458681 | 1.105 |
| PLXNB2  | protein_coding | 0.0004895 | 1.104 |
| REEP4   | protein_coding | 0.0162907 | 1.101 |
| SNX13   | protein_coding | 0.0214942 | 1.099 |
| ODR4    | protein_coding | 0.0146731 | 1.098 |
| FILIP1L | protein_coding | 0.0351918 | 1.097 |
| ARMC9   | protein_coding | 0.0252328 | 1.091 |
| TMEM30A | protein_coding | 0.0009324 | 1.090 |
| TMEM127 | protein_coding | 0.0406839 | 1.088 |
| CD46    | protein_coding | 0.0080402 | 1.087 |
| NAV3    | protein_coding | 0.0218179 | 1.084 |
| MTDH    | protein_coding | 1.46E-06  | 1.083 |
| JAG1    | protein_coding | 0.0029243 | 1.082 |
| SH3RF3  | protein_coding | 0.0409801 | 1.081 |
| CDC25C  | protein_coding | 0.0324668 | 1.080 |
| KDM3A   | protein_coding | 0.0014129 | 1.080 |
| CCDC88A | protein_coding | 6.83E-05  | 1.076 |
| TVP23B  | protein_coding | 0.039922  | 1.073 |
| ATP2A2  | protein_coding | 4.16E-05  | 1.072 |
| AGRN    | protein_coding | 0.0009371 | 1.072 |
| CENPE   | protein_coding | 8.30E-06  | 1.071 |
| KMT2B   | protein_coding | 8.54E-05  | 1.069 |
| PVR     | protein_coding | 0.0411411 | 1.068 |
| SPDL1   | protein_coding | 0.0021321 | 1.067 |
| SGMS1   | protein_coding | 0.0451782 | 1.066 |
| JARID2  | protein_coding | 0.0007901 | 1.066 |
| VEGFA   | protein_coding | 9.18E-06  | 1.066 |
| ZC3H4   | protein_coding | 0.000576  | 1.064 |
| PTPRG   | protein_coding | 0.002081  | 1.064 |
| LAMB1   | protein_coding | 0.0251929 | 1.063 |
| RBBP6   | protein_coding | 0.0049734 | 1.062 |

|             |                |           |       |
|-------------|----------------|-----------|-------|
| PLEKHG3     | protein_coding | 0.0129835 | 1.060 |
| SLC38A10    | protein_coding | 0.0405704 | 1.058 |
| KBTBD2      | protein_coding | 0.0209144 | 1.057 |
| DEF6        | protein_coding | 0.0056578 | 1.057 |
| HMGCR       | protein_coding | 0.0214821 | 1.056 |
| TSC1        | protein_coding | 0.0007231 | 1.056 |
| LAMA5       | protein_coding | 8.37E-05  | 1.054 |
| TNIK        | protein_coding | 0.0182457 | 1.053 |
| CRIM1       | protein_coding | 0.0001775 | 1.052 |
| DYRK1A      | protein_coding | 0.0195198 | 1.052 |
| MIR4435-2HG | lncRNA         | 0.0007508 | 1.051 |
| CEP295      | protein_coding | 0.0332145 | 1.050 |
| CEP95       | protein_coding | 0.0373043 | 1.050 |
| CWF19L2     | protein_coding | 0.0429105 | 1.048 |
| ABCA1       | protein_coding | 0.0030162 | 1.044 |
| EPHB2       | protein_coding | 0.0120943 | 1.041 |
| SACM1L      | protein_coding | 0.034206  | 1.041 |
| GOLGA1      | protein_coding | 0.0200997 | 1.040 |
| BRWD1       | protein_coding | 0.0085323 | 1.039 |
| CEP85       | protein_coding | 0.0223724 | 1.038 |
| DBF4B       | protein_coding | 0.007455  | 1.034 |
| NBPF1       | protein_coding | 0.013964  | 1.034 |
| NPC1        | protein_coding | 0.0037125 | 1.033 |
| HEG1        | protein_coding | 0.0007042 | 1.033 |
| PTPRF       | protein_coding | 0.0027568 | 1.032 |
| GPR107      | protein_coding | 0.027214  | 1.029 |
| LUC7L3      | protein_coding | 3.95E-10  | 1.029 |
| ATP11B      | protein_coding | 0.0194499 | 1.026 |
| TACC3       | protein_coding | 2.38E-07  | 1.026 |
| POLK        | protein_coding | 0.0318129 | 1.023 |
| RUFY3       | protein_coding | 0.0197207 | 1.023 |
| DDRGK1      | protein_coding | 0.0072699 | 1.022 |
| NEDD9       | protein_coding | 0.0145985 | 1.022 |
| BRAF        | protein_coding | 0.0073217 | 1.017 |
| APP         | protein_coding | 1.26E-07  | 1.016 |
| CLCN4       | protein_coding | 0.0423039 | 1.016 |
| FAM3C       | protein_coding | 0.0003652 | 1.014 |
| PTPRS       | protein_coding | 0.0045141 | 1.014 |
| INPP4A      | protein_coding | 0.0260916 | 1.014 |
| RBM5        | protein_coding | 0.0370909 | 1.013 |
| SEMA3C      | protein_coding | 0.016188  | 1.012 |
| GON4L       | protein_coding | 0.0014922 | 1.011 |
| SGPL1       | protein_coding | 0.0375753 | 1.011 |
| SUGP2       | protein_coding | 0.0011966 | 1.010 |
| THBS1       | protein_coding | 6.02E-06  | 1.009 |
| INTS6       | protein_coding | 0.0314827 | 1.007 |

|           |                                    |           |        |
|-----------|------------------------------------|-----------|--------|
| IGF1R     | protein_coding                     | 0.0371498 | 1.006  |
| ITGA3     | protein_coding                     | 9.58E-12  | 1.005  |
| PAX8-AS1  | lncRNA                             | 0.0293765 | 1.004  |
| SLC25A25  | protein_coding                     | 0.0419733 | 1.004  |
| CD9       | protein_coding                     | 0.0160119 | 1.000  |
| SFN       | protein_coding                     | 0.0003814 | -1.002 |
| R3HDM4    | protein_coding                     | 0.0077223 | -1.004 |
| NSMCE1    | protein_coding                     | 0.0339967 | -1.004 |
| SNRPB     | protein_coding                     | 0.000733  | -1.006 |
| RAB31     | protein_coding                     | 0.0001102 | -1.007 |
| TOX2      | protein_coding                     | 0.0009411 | -1.007 |
| TRIM44    | protein_coding                     | 9.73E-07  | -1.007 |
| FBXW5     | protein_coding                     | 2.84E-05  | -1.007 |
| MLX       | protein_coding                     | 0.0005664 | -1.007 |
| STOML2    | protein_coding                     | 5.00E-05  | -1.008 |
| PABPC4    | protein_coding                     | 3.50E-08  | -1.009 |
| MAPK1IP1L | protein_coding                     | 3.83E-05  | -1.009 |
| UBE2J1    | protein_coding                     | 0.0031703 | -1.010 |
| EIF3H     | protein_coding                     | 1.69E-05  | -1.011 |
| PTOV1     | protein_coding                     | 0.0019154 | -1.011 |
| DCAKD     | protein_coding                     | 0.0304219 | -1.013 |
| RNVU1-31  | snRNA                              | 1.85E-05  | -1.014 |
| CLSPN     | protein_coding                     | 1.99E-06  | -1.014 |
| PRPF38B   | protein_coding                     | 4.84E-06  | -1.015 |
| MYEOV     | protein_coding                     | 0.0003201 | -1.015 |
| NDUFAF8   | protein_coding                     | 3.96E-05  | -1.015 |
| SEPTIN10  | protein_coding                     | 7.55E-05  | -1.016 |
| PSMB7     | protein_coding                     | 3.77E-05  | -1.016 |
| MT1E      | protein_coding                     | 0.0323135 | -1.016 |
| UQCRB     | protein_coding                     | 1.01E-06  | -1.018 |
| COPG1     | protein_coding                     | 6.54E-06  | -1.018 |
| PEBP1     | protein_coding                     | 2.36E-05  | -1.018 |
| TRIM16L   | transcribed_unprocessed_pseudogene | 0.0270232 | -1.019 |
| RN7SL4P   | misc_RNA                           | 0.0208832 | -1.019 |
| DDAH1     | protein_coding                     | 6.65E-05  | -1.019 |
| LSM4      | protein_coding                     | 2.51E-07  | -1.020 |
| COPZ1     | protein_coding                     | 0.0074799 | -1.021 |
| SHMT2     | protein_coding                     | 0.0002741 | -1.023 |
| PRDX1     | protein_coding                     | 1.99E-07  | -1.023 |
| ANXA2P2   | processed_pseudogene               | 0.0001925 | -1.024 |
| MEA1      | protein_coding                     | 1.21E-09  | -1.024 |
| PTPN18    | protein_coding                     | 0.0231281 | -1.025 |
| GLTP      | protein_coding                     | 0.0003905 | -1.025 |
| CNN2      | protein_coding                     | 1.70E-08  | -1.028 |
| TIMM8B    | protein_coding                     | 0.0020491 | -1.028 |
| MRPS10    | protein_coding                     | 7.21E-06  | -1.028 |



|          |                      |           |        |
|----------|----------------------|-----------|--------|
| RPL10A   | protein_coding       | 1.17E-09  | -1.028 |
| DPYSL2   | protein_coding       | 4.39E-09  | -1.029 |
| NDUFS4   | protein_coding       | 0.0004743 | -1.031 |
| PEX10    | protein_coding       | 0.0182457 | -1.032 |
| UFM1     | protein_coding       | 0.0012422 | -1.033 |
| RPL23A   | protein_coding       | 1.42E-21  | -1.033 |
| PDLIM4   | protein_coding       | 0.0459081 | -1.033 |
| PRDX5    | protein_coding       | 5.86E-06  | -1.033 |
| TMSB10   | protein_coding       | 1.17E-21  | -1.034 |
| C12orf57 | protein_coding       | 0.0048328 | -1.035 |
| TIMM13   | protein_coding       | 0.000389  | -1.035 |
| MCM6     | protein_coding       | 0.0260422 | -1.036 |
| RPS24    | protein_coding       | 9.18E-09  | -1.036 |
| PARK7    | protein_coding       | 3.32E-06  | -1.037 |
| MRPL52   | protein_coding       | 0.0007119 | -1.038 |
| GPI      | protein_coding       | 8.98E-05  | -1.040 |
| SEC13    | protein_coding       | 2.60E-07  | -1.040 |
| UROD     | protein_coding       | 0.000974  | -1.041 |
| TPI1     | protein_coding       | 9.74E-16  | -1.042 |
| ATP5F1A  | protein_coding       | 7.72E-07  | -1.042 |
| HMGB1P6  | processed_pseudogene | 0.003853  | -1.042 |
| OXA1L    | protein_coding       | 0.0113802 | -1.042 |
| MLYCD    | protein_coding       | 0.0206079 | -1.043 |
| COX4I1   | protein_coding       | 1.97E-08  | -1.043 |
| CCDC25   | protein_coding       | 0.0017043 | -1.043 |
| LDHA     | protein_coding       | 4.71E-16  | -1.043 |
| PGK1     | protein_coding       | 4.32E-10  | -1.044 |
| MYL6     | protein_coding       | 8.21E-06  | -1.047 |
| SNRPA    | protein_coding       | 0.000924  | -1.047 |
| CDK2AP2  | protein_coding       | 0.0005636 | -1.048 |
| LCMT1    | protein_coding       | 0.049922  | -1.048 |
| AIP      | protein_coding       | 0.0015441 | -1.048 |
| YPEL5    | protein_coding       | 5.42E-05  | -1.051 |
| RAB34    | protein_coding       | 0.0003071 | -1.051 |
| IK       | protein_coding       | 7.03E-08  | -1.053 |
| BANF1    | protein_coding       | 0.0010868 | -1.053 |
| NENF     | protein_coding       | 0.0039182 | -1.053 |
| TUBA1B   | protein_coding       | 6.91E-21  | -1.053 |
| GNG12    | protein_coding       | 3.70E-06  | -1.053 |
| NAA38    | protein_coding       | 0.0074047 | -1.054 |
| ACAT2    | protein_coding       | 0.0003418 | -1.054 |
| EIF5A    | protein_coding       | 1.78E-12  | -1.054 |
| GOT2     | protein_coding       | 0.0007072 | -1.055 |
| SOCS4    | protein_coding       | 0.0034336 | -1.055 |
| GGA2     | protein_coding       | 0.0128185 | -1.057 |
| APEX1    | protein_coding       | 0.0001882 | -1.057 |

|             |                |           |        |
|-------------|----------------|-----------|--------|
| SKA2        | protein_coding | 3.13E-08  | -1.057 |
| ORMDL3      | protein_coding | 0.0342515 | -1.057 |
| SNHG16      | lncRNA         | 0.0001365 | -1.057 |
| NUDT15      | protein_coding | 0.0346687 | -1.058 |
| ENO1        | protein_coding | 7.56E-19  | -1.058 |
| CYB5B       | protein_coding | 0.0034344 | -1.058 |
| UQCR10      | protein_coding | 0.0023615 | -1.058 |
| AHCY        | protein_coding | 1.72E-05  | -1.061 |
| RPL15       | protein_coding | 1.99E-13  | -1.062 |
| SERINC2     | protein_coding | 0.0158777 | -1.062 |
| KRT18       | protein_coding | 4.53E-14  | -1.063 |
| DSTN        | protein_coding | 2.04E-12  | -1.063 |
| SPTLC3      | protein_coding | 0.001367  | -1.064 |
| PA2G4       | protein_coding | 0.0017238 | -1.064 |
| LRRC42      | protein_coding | 0.0107437 | -1.064 |
| AKR1C3      | protein_coding | 0.0002375 | -1.066 |
| VDAC1       | protein_coding | 1.01E-07  | -1.066 |
| NDUFS7      | protein_coding | 0.0147633 | -1.066 |
| DGCR6L      | protein_coding | 0.0148578 | -1.066 |
| MRPS15      | protein_coding | 2.97E-05  | -1.067 |
| RWDD1       | protein_coding | 0.0004205 | -1.067 |
| SRP14       | protein_coding | 8.21E-09  | -1.068 |
| ARL2        | protein_coding | 0.0477498 | -1.068 |
| DAP         | protein_coding | 1.46E-11  | -1.068 |
| BCKDK       | protein_coding | 0.0157979 | -1.069 |
| WDR54       | protein_coding | 0.0412385 | -1.069 |
| EIF4B       | protein_coding | 2.22E-07  | -1.070 |
| VAMP3       | protein_coding | 0.0002508 | -1.072 |
| WDR43       | protein_coding | 1.87E-06  | -1.073 |
| LSM7        | protein_coding | 0.0346741 | -1.073 |
| PYCR1       | protein_coding | 0.0004276 | -1.074 |
| ACTB        | protein_coding | 9.42E-31  | -1.075 |
| SNX2        | protein_coding | 0.0003097 | -1.076 |
| IFT20       | protein_coding | 0.0211142 | -1.076 |
| ROMO1       | protein_coding | 0.0001325 | -1.076 |
| CENPI       | protein_coding | 0.0029532 | -1.076 |
| EIF2S3      | protein_coding | 5.47E-07  | -1.077 |
| MRPS16      | protein_coding | 0.0071076 | -1.078 |
| BEX3        | protein_coding | 1.59E-05  | -1.079 |
| RP11-54H7.4 |                | 0.0013607 | -1.080 |
| GADD45GIP1  | protein_coding | 1.56E-07  | -1.081 |
| NFU1        | protein_coding | 0.0142464 | -1.082 |
| CARD19      | protein_coding | 0.0024749 | -1.083 |
| COX7C       | protein_coding | 5.59E-14  | -1.083 |
| ACTR1B      | protein_coding | 0.0031261 | -1.084 |
| CFL2        | protein_coding | 0.0037275 | -1.084 |

|          |                      |           |        |
|----------|----------------------|-----------|--------|
| PPP1R14B | protein_coding       | 2.57E-07  | -1.084 |
| KLHDC3   | protein_coding       | 3.95E-05  | -1.085 |
| PDHB     | protein_coding       | 0.0003607 | -1.085 |
| BUD31    | protein_coding       | 0.0002169 | -1.086 |
| COA3     | protein_coding       | 0.0176596 | -1.090 |
| ELOF1    | protein_coding       | 0.0094361 | -1.090 |
| IPO7     | protein_coding       | 1.71E-09  | -1.090 |
| AP2S1    | protein_coding       | 0.000578  | -1.091 |
| ATP5F1C  | protein_coding       | 4.36E-06  | -1.091 |
| POLR2C   | protein_coding       | 0.0094517 | -1.092 |
| RPS25    | protein_coding       | 1.17E-14  | -1.094 |
| RAD23A   | protein_coding       | 4.62E-07  | -1.095 |
| CENPX    | protein_coding       | 0.0158328 | -1.096 |
| MRPL11   | protein_coding       | 0.0019036 | -1.096 |
| PPIL1    | protein_coding       | 0.0003242 | -1.097 |
| SLIRP    | protein_coding       | 0.0024382 | -1.097 |
| RPL14P1  | processed_pseudogene | 0.0418968 | -1.098 |
| SZRD1    | protein_coding       | 2.43E-06  | -1.098 |
| UQCRC1   | protein_coding       | 3.60E-05  | -1.099 |
| SLC2A4RG | protein_coding       | 0.000411  | -1.099 |
| EEF2     | protein_coding       | 1.61E-16  | -1.100 |
| EIF4EBP2 | protein_coding       | 2.30E-05  | -1.100 |
| POLR2J   | protein_coding       | 9.70E-07  | -1.101 |
| STMN3    | protein_coding       | 0.0435957 | -1.102 |
| NHS      | protein_coding       | 0.0255512 | -1.102 |
| VEGFB    | protein_coding       | 5.05E-08  | -1.103 |
| COX7A2   | protein_coding       | 0.001497  | -1.103 |
| FAM210B  | protein_coding       | 0.0253764 | -1.104 |
| CMBL     | protein_coding       | 0.0016086 | -1.105 |
| TUBA1A   | protein_coding       | 1.88E-05  | -1.105 |
| EIF6     | protein_coding       | 5.14E-05  | -1.106 |
| TMSB4X   | protein_coding       | 4.61E-18  | -1.107 |
| OLA1     | protein_coding       | 5.01E-08  | -1.109 |
| MTIF3    | protein_coding       | 0.0080273 | -1.109 |
| PLPPR2   | protein_coding       | 0.0381057 | -1.109 |
| ATP6V1F  | protein_coding       | 0.0008187 | -1.109 |
| PSMB5    | protein_coding       | 0.0023539 | -1.110 |
| TOMM22   | protein_coding       | 0.0308445 | -1.111 |
| NDUFB4   | protein_coding       | 0.0364229 | -1.116 |
| ELOB     | protein_coding       | 3.77E-09  | -1.116 |
| ECSIT    | protein_coding       | 0.0091578 | -1.116 |
| MDH2     | protein_coding       | 2.05E-08  | -1.118 |
| YEATS4   | protein_coding       | 0.0413046 | -1.119 |
| PKIG     | protein_coding       | 7.86E-05  | -1.119 |
| CSDE1    | protein_coding       | 1.23E-18  | -1.120 |
| RGS10    | protein_coding       | 1.68E-05  | -1.124 |

|          |                      |           |        |
|----------|----------------------|-----------|--------|
| CHRA1    | protein_coding       | 0.0027292 | -1.124 |
| BCL2L1   | protein_coding       | 4.87E-11  | -1.124 |
| TMEM230  | protein_coding       | 1.92E-05  | -1.125 |
| PPP1R13L | protein_coding       | 0.0072509 | -1.128 |
| RBMS2    | protein_coding       | 0.0002317 | -1.132 |
| CORO1B   | protein_coding       | 9.95E-08  | -1.132 |
| SERPINB1 | protein_coding       | 9.55E-06  | -1.133 |
| TXN      | protein_coding       | 2.35E-08  | -1.135 |
| PFN1     | protein_coding       | 4.89E-19  | -1.135 |
| CAT      | protein_coding       | 0.0050382 | -1.135 |
| MRPL21   | protein_coding       | 0.002984  | -1.137 |
| NPM3     | protein_coding       | 0.0267304 | -1.138 |
| SHARPIN  | protein_coding       | 0.0006151 | -1.139 |
| POLR2L   | protein_coding       | 4.95E-06  | -1.140 |
| UQCRCQ   | protein_coding       | 1.93E-08  | -1.140 |
| RPL3P4   | processed_pseudogene | 0.0018135 | -1.142 |
| POLD2    | protein_coding       | 8.69E-07  | -1.142 |
| SCRN1    | protein_coding       | 2.58E-07  | -1.142 |
| FPGS     | protein_coding       | 0.0074957 | -1.143 |
| G6PD     | protein_coding       | 2.01E-09  | -1.145 |
| ARMCX3   | protein_coding       | 0.004957  | -1.146 |
| PAFAH1B3 | protein_coding       | 0.0052858 | -1.147 |
| NPRL3    | protein_coding       | 0.004164  | -1.147 |
| RNF11    | protein_coding       | 1.57E-05  | -1.147 |
| MICOS13  | protein_coding       | 0.0211142 | -1.148 |
| PAXX     | protein_coding       | 0.0213272 | -1.150 |
| POLR2G   | protein_coding       | 0.007209  | -1.150 |
| ARHGDIB  | protein_coding       | 2.11E-07  | -1.150 |
| NUBP2    | protein_coding       | 0.0354194 | -1.150 |
| RPL36    | protein_coding       | 2.46E-14  | -1.150 |
| ELK1     | protein_coding       | 0.0005239 | -1.151 |
| BTBD2    | protein_coding       | 0.0009152 | -1.151 |
| PHB2     | protein_coding       | 4.63E-06  | -1.153 |
| RHOD     | protein_coding       | 0.0398949 | -1.153 |
| TNS3     | protein_coding       | 8.58E-09  | -1.154 |
| CCDC9B   | protein_coding       | 4.02E-06  | -1.154 |
| DMAC2    | protein_coding       | 0.0050526 | -1.154 |
| CHMP3    | protein_coding       | 0.0033783 | -1.156 |
| ARPC3    | protein_coding       | 9.81E-08  | -1.157 |
| FIBP     | protein_coding       | 6.00E-05  | -1.158 |
| RPL6     | protein_coding       | 1.91E-17  | -1.160 |
| UBE2N    | protein_coding       | 0.0002783 | -1.160 |
| CDK4     | protein_coding       | 1.74E-05  | -1.160 |
| S100A4   | protein_coding       | 2.06E-09  | -1.161 |
| PAICS    | protein_coding       | 5.90E-08  | -1.162 |
| BTF3     | protein_coding       | 1.94E-12  | -1.162 |

|                |                                    |           |        |
|----------------|------------------------------------|-----------|--------|
| TIMM17B        | protein_coding                     | 0.0013849 | -1.162 |
| NBPF26         | protein_coding                     | 0.0127936 | -1.163 |
| BCAT1          | protein_coding                     | 1.66E-05  | -1.165 |
| RP11-181C21.4  |                                    | 0.0162962 | -1.166 |
| RPS13          | protein_coding                     | 1.65E-11  | -1.166 |
| COMMD6         | protein_coding                     | 0.0110162 | -1.167 |
| RPSAP47        | processed_pseudogene               | 0.0236594 | -1.168 |
| UFC1           | protein_coding                     | 8.34E-05  | -1.169 |
| POLE4          | protein_coding                     | 0.0168648 | -1.170 |
| NBPF20         | protein_coding                     | 0.0018214 | -1.171 |
| COPS3          | protein_coding                     | 2.23E-05  | -1.173 |
| C19orf48       | transcribed_unitary_pseudogene     | 0.004416  | -1.173 |
| SERTAD4-AS1    | lncRNA                             | 0.0293012 | -1.174 |
| YBX1           | protein_coding                     | 4.79E-25  | -1.175 |
| CENPL          | protein_coding                     | 0.0006742 | -1.176 |
| ST13           | protein_coding                     | 3.85E-10  | -1.177 |
| USP12          | protein_coding                     | 0.0019297 | -1.179 |
| PSMD8          | protein_coding                     | 7.09E-12  | -1.179 |
| PUSL1          | protein_coding                     | 0.0420152 | -1.180 |
| CTNNAL1        | protein_coding                     | 4.11E-14  | -1.182 |
| RRAS           | protein_coding                     | 0.0041865 | -1.183 |
| NBPF8          | transcribed_unprocessed_pseudogene | 0.0036756 | -1.186 |
| SRA1           | protein_coding                     | 0.0114442 | -1.188 |
| GTF2F2         | protein_coding                     | 0.0017078 | -1.188 |
| RPS19          | protein_coding                     | 2.17E-24  | -1.192 |
| SNRPC          | protein_coding                     | 1.78E-12  | -1.193 |
| XX-FW83563B9.5 |                                    | 0.0335153 | -1.195 |
| CYB5R3         | protein_coding                     | 4.40E-09  | -1.195 |
| SLC39A4        | protein_coding                     | 0.0324579 | -1.195 |
| PPP1CA         | protein_coding                     | 8.58E-09  | -1.196 |
| TMEM134        | protein_coding                     | 0.0385308 | -1.196 |
| RPL34          | protein_coding                     | 5.05E-10  | -1.197 |
| RPS20          | protein_coding                     | 4.29E-21  | -1.197 |
| PPM1G          | protein_coding                     | 8.01E-15  | -1.197 |
| CETN2          | protein_coding                     | 0.0029788 | -1.198 |
| RPL7P1         | processed_pseudogene               | 0.0235869 | -1.198 |
| DCXR           | protein_coding                     | 0.005593  | -1.199 |
| FEN1           | protein_coding                     | 0.0002967 | -1.200 |
| RAC2           | protein_coding                     | 9.73E-08  | -1.201 |
| RPS6           | protein_coding                     | 5.37E-23  | -1.202 |
| GPX4           | protein_coding                     | 1.09E-23  | -1.203 |
| SYF2           | protein_coding                     | 1.27E-07  | -1.203 |
| MAPK3          | protein_coding                     | 0.0194553 | -1.204 |
| NDUFB10        | protein_coding                     | 5.79E-08  | -1.204 |
| MMADHC         | protein_coding                     | 0.0021077 | -1.204 |
| ADI1           | protein_coding                     | 2.54E-05  | -1.209 |

|          |                                  |           |        |
|----------|----------------------------------|-----------|--------|
| CDC45    | protein_coding                   | 0.0231281 | -1.210 |
| RPL23    | protein_coding                   | 1.09E-16  | -1.210 |
| EIF3K    | protein_coding                   | 1.95E-05  | -1.212 |
| PRDX6    | protein_coding                   | 1.15E-07  | -1.213 |
| NCKIPSD  | protein_coding                   | 0.0343769 | -1.214 |
| SSBP1    | protein_coding                   | 1.71E-06  | -1.216 |
| RHOA     | protein_coding                   | 1.75E-18  | -1.216 |
| DYNC2I2  | protein_coding                   | 1.31E-05  | -1.220 |
| NUTF2    | protein_coding                   | 7.48E-06  | -1.220 |
| RPL30    | protein_coding                   | 9.99E-17  | -1.222 |
| TGM2     | protein_coding                   | 1.38E-10  | -1.222 |
| EHD2     | protein_coding                   | 8.59E-08  | -1.223 |
| RPL19    | protein_coding                   | 1.06E-34  | -1.224 |
| MLST8    | protein_coding                   | 5.33E-06  | -1.226 |
| RHOC     | protein_coding                   | 0.0001333 | -1.227 |
| PTMA     | protein_coding                   | 1.83E-30  | -1.228 |
| VMA21    | protein_coding                   | 0.0006447 | -1.231 |
| RPL24    | protein_coding                   | 9.92E-19  | -1.231 |
| SNTA1    | protein_coding                   | 0.0011893 | -1.231 |
| NOB1     | protein_coding                   | 5.42E-05  | -1.231 |
| RPLP2    | protein_coding                   | 5.21E-17  | -1.231 |
| RPS2P5   | processed_pseudogene             | 4.70E-06  | -1.233 |
| IDH3G    | protein_coding                   | 0.0005559 | -1.233 |
| TAGLN2   | protein_coding                   | 5.41E-18  | -1.234 |
| NDUFAF3  | protein_coding                   | 0.0026638 | -1.235 |
| SLC25A5  | protein_coding                   | 4.13E-15  | -1.236 |
| RPL6P27  | transcribed_processed_pseudogene | 0.0036287 | -1.237 |
| MAF1     | protein_coding                   | 4.21E-06  | -1.238 |
| RPL37A   | protein_coding                   | 8.13E-19  | -1.238 |
| UBL5     | protein_coding                   | 0.0001639 | -1.239 |
| MOCS2    | protein_coding                   | 4.25E-05  | -1.242 |
| MT2A     | protein_coding                   | 1.51E-14  | -1.243 |
| NAMPTP1  | processed_pseudogene             | 0.0134223 | -1.244 |
| DERA     | protein_coding                   | 0.003061  | -1.245 |
| TNNT1    | protein_coding                   | 3.26E-07  | -1.247 |
| TPT1     | protein_coding                   | 4.53E-13  | -1.247 |
| RPS12    | protein_coding                   | 1.40E-18  | -1.249 |
| ACTG1    | protein_coding                   | 1.31E-41  | -1.251 |
| NSA2     | protein_coding                   | 5.48E-10  | -1.252 |
| URM1     | protein_coding                   | 0.0011923 | -1.253 |
| MAPKAPK3 | protein_coding                   | 6.21E-05  | -1.253 |
| RPL22P1  | processed_pseudogene             | 0.0137983 | -1.254 |
| PTRHD1   | protein_coding                   | 0.0042714 | -1.255 |
| PRDX2    | protein_coding                   | 3.96E-06  | -1.255 |
| GUCD1    | protein_coding                   | 5.19E-06  | -1.256 |
| CAVIN3   | protein_coding                   | 2.80E-06  | -1.257 |

|          |                      |           |        |
|----------|----------------------|-----------|--------|
| EEF1A1P5 | processed_pseudogene | 7.59E-12  | -1.257 |
| PDLIM1   | protein_coding       | 5.77E-06  | -1.258 |
| EEF1B2   | protein_coding       | 8.50E-18  | -1.259 |
| DAD1     | protein_coding       | 0.0002184 | -1.260 |
| KIAA1522 | protein_coding       | 7.91E-05  | -1.262 |
| TALDO1   | protein_coding       | 3.11E-16  | -1.262 |
| CLNS1A   | protein_coding       | 7.27E-07  | -1.263 |
| RPS15A   | protein_coding       | 0.0009761 | -1.265 |
| TKT      | protein_coding       | 5.24E-19  | -1.265 |
| NACA     | protein_coding       | 1.24E-16  | -1.267 |
| EIF5B    | protein_coding       | 6.02E-13  | -1.270 |
| CAPG     | protein_coding       | 6.18E-10  | -1.271 |
| DHFR     | protein_coding       | 0.0001225 | -1.271 |
| NIPSNAP2 | protein_coding       | 0.0034424 | -1.272 |
| ATP5MJ   | protein_coding       | 9.99E-08  | -1.273 |
| HIRIP3   | protein_coding       | 0.001516  | -1.274 |
| RPL39    | protein_coding       | 1.02E-10  | -1.276 |
| HNRNPA1  | protein_coding       | 4.56E-21  | -1.276 |
| RPS14    | protein_coding       | 1.81E-12  | -1.278 |
| NRGN     | protein_coding       | 0.0188994 | -1.278 |
| FTL      | protein_coding       | 1.47E-27  | -1.279 |
| RPL3     | protein_coding       | 4.72E-17  | -1.279 |
| KATNAL1  | protein_coding       | 0.00038   | -1.279 |
| RPL7     | protein_coding       | 8.28E-21  | -1.280 |
| ZNF880   | protein_coding       | 0.0320123 | -1.281 |
| SLC25A43 | protein_coding       | 0.0130841 | -1.282 |
| SH3BGRL  | protein_coding       | 0.000613  | -1.284 |
| UXT      | protein_coding       | 4.49E-05  | -1.285 |
| BNIP3L   | protein_coding       | 8.52E-06  | -1.287 |
| KRT7     | protein_coding       | 4.78E-19  | -1.287 |
| NT5DC2   | protein_coding       | 1.19E-09  | -1.290 |
| DPP3     | protein_coding       | 0.0001218 | -1.291 |
| SNHG29   | lncRNA               | 2.41E-10  | -1.291 |
| S100A16  | protein_coding       | 3.04E-10  | -1.292 |
| RABGGTA  | protein_coding       | 0.016152  | -1.292 |
| RPS2P46  | processed_pseudogene | 1.39E-06  | -1.295 |
| EIF3I    | protein_coding       | 7.46E-13  | -1.297 |
| EEF1A1   | protein_coding       | 0.0002212 | -1.297 |
| FBL      | protein_coding       | 2.82E-07  | -1.300 |
| RPL7A    | protein_coding       | 1.95E-26  | -1.300 |
| RPS7     | protein_coding       | 2.06E-19  | -1.300 |
| EEF1B2P3 | processed_pseudogene | 0.0215166 | -1.300 |
| POLR2I   | protein_coding       | 4.93E-06  | -1.301 |
| RPL10P16 | processed_pseudogene | 0.0411779 | -1.301 |
| NQO1     | protein_coding       | 3.40E-09  | -1.304 |
| RPS27A   | protein_coding       | 8.17E-18  | -1.304 |

|              |                      |           |        |
|--------------|----------------------|-----------|--------|
| MAFK         | protein_coding       | 0.0097992 | -1.304 |
| HIPK2        | protein_coding       | 1.37E-20  | -1.304 |
| HMGB1        | protein_coding       | 2.46E-13  | -1.308 |
| ABHD4        | protein_coding       | 0.0006782 | -1.308 |
| S100A6       | protein_coding       | 2.46E-31  | -1.309 |
| RN7SL1       | misc_RNA             | 0.0019793 | -1.311 |
| NDUF55       | protein_coding       | 3.00E-15  | -1.312 |
| DUSP23       | protein_coding       | 0.0029274 | -1.312 |
| RP11-290D2.6 |                      | 0.0377533 | -1.312 |
| NT5C         | protein_coding       | 0.0009973 | -1.313 |
| SMIM4        | protein_coding       | 0.0062018 | -1.313 |
| HIGD2A       | protein_coding       | 0.0004652 | -1.317 |
| RPS23        | protein_coding       | 1.81E-34  | -1.319 |
| ARPC1A       | protein_coding       | 0.0066703 | -1.319 |
| RPS27        | protein_coding       | 2.38E-22  | -1.320 |
| RNF181       | protein_coding       | 7.01E-05  | -1.323 |
| RPL35A       | protein_coding       | 1.41E-15  | -1.323 |
| ARHGAP1      | protein_coding       | 0.0002838 | -1.327 |
| LAMTOR4      | protein_coding       | 0.0002382 | -1.328 |
| RPL35        | protein_coding       | 7.79E-32  | -1.329 |
| GTF3A        | protein_coding       | 1.89E-09  | -1.329 |
| GPX1         | protein_coding       | 8.87E-13  | -1.330 |
| MYL9         | protein_coding       | 3.02E-11  | -1.330 |
| C1orf122     | protein_coding       | 0.0039863 | -1.331 |
| RPL13A       | protein_coding       | 4.99E-30  | -1.332 |
| MRPL9        | protein_coding       | 0.0001419 | -1.336 |
| MORC4        | protein_coding       | 3.29E-09  | -1.336 |
| RPLP0P6      | processed_pseudogene | 4.32E-05  | -1.338 |
| HYI          | protein_coding       | 6.63E-05  | -1.339 |
| TMEM219      | protein_coding       | 0.0034372 | -1.339 |
| TOMM7        | protein_coding       | 1.50E-06  | -1.339 |
| ZCCHC24      | protein_coding       | 5.27E-05  | -1.339 |
| RNASEH2C     | protein_coding       | 0.00016   | -1.341 |
| KRT19        | protein_coding       | 7.08E-26  | -1.341 |
| CCNI         | protein_coding       | 4.92E-19  | -1.342 |
| WTIP         | protein_coding       | 0.0002288 | -1.346 |
| SLC9A3R2     | protein_coding       | 2.07E-18  | -1.347 |
| PPIA         | protein_coding       | 1.06E-31  | -1.349 |
| ECI1         | protein_coding       | 0.0150652 | -1.352 |
| RPS28P7      | processed_pseudogene | 0.0001925 | -1.353 |
| RPL5         | protein_coding       | 3.08E-26  | -1.355 |
| RPL39P3      | processed_pseudogene | 0.0077083 | -1.356 |
| UCP2         | protein_coding       | 0.0003813 | -1.357 |
| RBM3         | protein_coding       | 1.43E-13  | -1.357 |
| RPL4         | protein_coding       | 1.11E-32  | -1.362 |
| MCM4         | protein_coding       | 5.00E-07  | -1.364 |



|               |                      |           |        |
|---------------|----------------------|-----------|--------|
| C14orf119     | protein_coding       | 0.0051643 | -1.366 |
| RPS3AP6       | processed_pseudogene | 0.0478652 | -1.367 |
| FKBP1A        | protein_coding       | 1.35E-09  | -1.368 |
| WBP2          | protein_coding       | 2.81E-10  | -1.369 |
| MRPL57        | protein_coding       | 0.0060504 | -1.370 |
| UBA52         | protein_coding       | 5.62E-18  | -1.371 |
| S100A10       | protein_coding       | 1.44E-33  | -1.371 |
| PGLS          | protein_coding       | 8.59E-06  | -1.372 |
| TUBA4A        | protein_coding       | 0.0002914 | -1.373 |
| RPS3A         | protein_coding       | 9.38E-26  | -1.376 |
| ERCC1         | protein_coding       | 7.01E-06  | -1.378 |
| DEF8          | protein_coding       | 0.0002624 | -1.378 |
| RP11-84E17.1  |                      | 2.02E-08  | -1.379 |
| ARRDC2        | protein_coding       | 0.0034248 | -1.379 |
| RPLP1         | protein_coding       | 1.30E-23  | -1.380 |
| OST4          | protein_coding       | 2.53E-06  | -1.380 |
| RPS7P1        | processed_pseudogene | 9.57E-06  | -1.389 |
| BAD           | protein_coding       | 4.55E-07  | -1.389 |
| UBE2L6        | protein_coding       | 0.000613  | -1.391 |
| RPL27         | protein_coding       | 9.75E-27  | -1.394 |
| NDUFV3        | protein_coding       | 5.74E-09  | -1.396 |
| IRAK1         | protein_coding       | 4.80E-16  | -1.396 |
| RPS11         | protein_coding       | 4.72E-31  | -1.397 |
| ATP5F1E       | protein_coding       | 3.94E-16  | -1.401 |
| MAGED1        | protein_coding       | 0.0003308 | -1.402 |
| NME4          | protein_coding       | 0.0001971 | -1.403 |
| AC009245.3    |                      | 0.0058625 | -1.403 |
| NDUFB11       | protein_coding       | 1.81E-06  | -1.404 |
| ACOT13        | protein_coding       | 0.0014129 | -1.405 |
| RPS4X         | protein_coding       | 1.95E-32  | -1.406 |
| RP11-425L10.1 |                      | 2.22E-10  | -1.408 |
| CCND1         | protein_coding       | 1.30E-23  | -1.410 |
| KRT80         | protein_coding       | 3.55E-09  | -1.411 |
| COPE          | protein_coding       | 5.37E-05  | -1.415 |
| RRP8          | protein_coding       | 3.60E-05  | -1.417 |
| COX6B1        | protein_coding       | 1.52E-05  | -1.417 |
| PABPC1        | protein_coding       | 7.19E-29  | -1.418 |
| GUK1          | protein_coding       | 1.18E-15  | -1.419 |
| COTL1         | protein_coding       | 9.38E-22  | -1.422 |
| RPS26         | protein_coding       | 1.58E-11  | -1.423 |
| CDK6          | protein_coding       | 1.83E-08  | -1.423 |
| BST2          | protein_coding       | 6.32E-07  | -1.424 |
| PSME1         | protein_coding       | 3.55E-09  | -1.430 |
| RPSAP15       | processed_pseudogene | 0.002985  | -1.431 |
| IMPDH2        | protein_coding       | 4.73E-15  | -1.432 |
| GXYLT1        | protein_coding       | 0.0004253 | -1.432 |

|               |                                  |           |        |
|---------------|----------------------------------|-----------|--------|
| RPS3AP26      | processed_pseudogene             | 0.0029399 | -1.433 |
| MPG           | protein_coding                   | 0.0004986 | -1.433 |
| CDT1          | protein_coding                   | 0.0016033 | -1.433 |
| HNRNPA1P7     | processed_pseudogene             | 6.19E-07  | -1.434 |
| IFITM3        | protein_coding                   | 1.74E-08  | -1.434 |
| RPL12         | protein_coding                   | 5.12E-41  | -1.435 |
| NDUFS8        | protein_coding                   | 2.26E-08  | -1.436 |
| POLR2E        | protein_coding                   | 1.36E-12  | -1.437 |
| RPL8          | protein_coding                   | 1.47E-31  | -1.438 |
| RPSAP58       | processed_pseudogene             | 1.59E-06  | -1.443 |
| PDLIM7        | protein_coding                   | 9.47E-08  | -1.444 |
| AKR7A2        | protein_coding                   | 1.27E-05  | -1.444 |
| AGO1          | protein_coding                   | 7.11E-10  | -1.452 |
| TSPO          | protein_coding                   | 0.0002246 | -1.453 |
| CDA           | protein_coding                   | 1.94E-05  | -1.453 |
| RPS15P4       | processed_pseudogene             | 0.0002762 | -1.454 |
| CHP1          | protein_coding                   | 5.44E-08  | -1.454 |
| CTD-2287O16.1 |                                  | 0.031103  | -1.456 |
| MRPL17        | protein_coding                   | 4.86E-06  | -1.456 |
| RP5-940J5.9   |                                  | 0.0051487 | -1.457 |
| MRPL54        | protein_coding                   | 0.0101653 | -1.457 |
| CCDC34        | protein_coding                   | 4.32E-07  | -1.459 |
| RABIF         | protein_coding                   | 0.0258792 | -1.459 |
| RPS16         | protein_coding                   | 2.00E-28  | -1.460 |
| ZBED5-AS1     | lncRNA                           | 5.01E-05  | -1.461 |
| VPS25         | protein_coding                   | 0.0012309 | -1.462 |
| RP4-614O4.13  |                                  | 0.0271334 | -1.463 |
| TXN2          | protein_coding                   | 0.0004665 | -1.463 |
| RNU6-6P       | snRNA                            | 9.13E-06  | -1.464 |
| HSPB1         | protein_coding                   | 5.64E-11  | -1.465 |
| HTATSF1       | protein_coding                   | 2.12E-16  | -1.470 |
| DPM3          | protein_coding                   | 0.0081557 | -1.470 |
| RPL10         | protein_coding                   | 4.41E-25  | -1.472 |
| SRM           | protein_coding                   | 1.19E-11  | -1.474 |
| HNRNPA3       | protein_coding                   | 1.07E-16  | -1.477 |
| RPS21         | protein_coding                   | 4.59E-23  | -1.481 |
| PPIAP22       | processed_pseudogene             | 0.003152  | -1.482 |
| RP4-706A16.3  |                                  | 7.48E-06  | -1.483 |
| RPL37         | protein_coding                   | 4.02E-37  | -1.486 |
| ANP32A        | protein_coding                   | 1.24E-09  | -1.488 |
| RPL18         | protein_coding                   | 5.48E-24  | -1.495 |
| AP1S2         | protein_coding                   | 3.58E-07  | -1.496 |
| PLP2          | protein_coding                   | 1.15E-18  | -1.500 |
| CTB-63M22.1   |                                  | 3.69E-05  | -1.502 |
| TUBBP1        | transcribed_processed_pseudogene | 0.0001365 | -1.511 |
| RTL8A         | protein_coding                   | 0.0001453 | -1.512 |

|                 |                        |           |        |
|-----------------|------------------------|-----------|--------|
| C17orf67        | protein_coding         | 0.0130633 | -1.512 |
| ITPRIPL2        | protein_coding         | 3.35E-05  | -1.513 |
| NPM1            | protein_coding         | 9.67E-27  | -1.516 |
| RPL11           | protein_coding         | 2.33E-34  | -1.516 |
| TRIM52-AS1      | lncRNA                 | 0.0338683 | -1.518 |
| GPX3            | protein_coding         | 5.27E-07  | -1.518 |
| RTL8B           | protein_coding         | 0.005756  | -1.519 |
| RPL15P3         | processed_pseudogene   | 0.0061728 | -1.520 |
| RAB1B           | protein_coding         | 6.01E-12  | -1.521 |
| RP11-466H18.1   |                        | 3.99E-10  | -1.523 |
| RPS15           | protein_coding         | 1.28E-38  | -1.523 |
| LGALS1          | protein_coding         | 2.15E-25  | -1.526 |
| CLIC3           | protein_coding         | 0.0214507 | -1.529 |
| RPL14           | protein_coding         | 8.50E-42  | -1.531 |
| RPL21           | protein_coding         | 4.64E-27  | -1.531 |
| RPS29           | protein_coding         | 1.14E-06  | -1.535 |
| SLC25A23        | protein_coding         | 9.99E-09  | -1.541 |
| METTL26         | protein_coding         | 0.0137101 | -1.541 |
| FBP1            | protein_coding         | 0.0032657 | -1.544 |
| RPS3            | protein_coding         | 1.27E-43  | -1.549 |
| RPSA            | protein_coding         | 2.40E-44  | -1.552 |
| RPS2            | protein_coding         | 1.61E-40  | -1.556 |
| SAP18           | protein_coding         | 3.21E-15  | -1.557 |
| LHFPL4          | protein_coding         | 0.0175202 | -1.562 |
| CTNNBIP1        | protein_coding         | 2.94E-06  | -1.562 |
| S100A2          | protein_coding         | 0.0041854 | -1.563 |
| PSMC3IP         | protein_coding         | 7.18E-09  | -1.574 |
| RPL41           | protein_coding         | 6.30E-11  | -1.578 |
| APRT            | protein_coding         | 0.0006013 | -1.582 |
| MYBL2           | protein_coding         | 4.65E-08  | -1.584 |
| SCAND1          | protein_coding         | 0.0001194 | -1.584 |
| RPL13           | protein_coding         | 7.46E-40  | -1.592 |
| MTND2P28        | unprocessed_pseudogene | 0.0364672 | -1.595 |
| RP11-632C17_A.1 |                        | 2.62E-07  | -1.596 |
| RPS5            | protein_coding         | 1.94E-22  | -1.601 |
| RACK1           | protein_coding         | 5.75E-48  | -1.601 |
| APOL2           | protein_coding         | 0.0003692 | -1.605 |
| ISG15           | protein_coding         | 1.98E-06  | -1.606 |
| EIF4EBP1        | protein_coding         | 5.07E-11  | -1.607 |
| SNORA12         | snoRNA                 | 0.0257206 | -1.608 |
| S100A11         | protein_coding         | 2.80E-22  | -1.611 |
| GAPDH           | protein_coding         | 1.04E-59  | -1.613 |
| RPL32           | protein_coding         | 9.05E-42  | -1.617 |
| RPL28           | protein_coding         | 2.08E-42  | -1.617 |
| RPL27A          | protein_coding         | 1.08E-35  | -1.618 |
| MMP24OS         | protein_coding         | 4.82E-18  | -1.619 |

|               |                      |           |        |
|---------------|----------------------|-----------|--------|
| ZNF688        | protein_coding       | 0.0198164 | -1.621 |
| CAPNS1        | protein_coding       | 4.82E-21  | -1.624 |
| RPL18A        | protein_coding       | 3.95E-48  | -1.624 |
| ATP5F1D       | protein_coding       | 1.11E-06  | -1.627 |
| FHL3          | protein_coding       | 0.0116427 | -1.628 |
| RP11-253E3.3  |                      | 0.0419733 | -1.628 |
| MAP4          | protein_coding       | 1.82E-36  | -1.633 |
| RPL9P7        | processed_pseudogene | 0.0415198 | -1.633 |
| ANXA8         | protein_coding       | 0.000459  | -1.641 |
| RPL13AP5      | processed_pseudogene | 1.78E-10  | -1.653 |
| GAMT          | protein_coding       | 0.0010685 | -1.653 |
| RTL8C         | protein_coding       | 2.58E-08  | -1.660 |
| FAM219A       | protein_coding       | 5.47E-05  | -1.665 |
| CYP1B1        | protein_coding       | 2.25E-08  | -1.668 |
| PLAAT4        | protein_coding       | 9.21E-08  | -1.673 |
| KCND1         | protein_coding       | 0.004891  | -1.680 |
| CORO1C        | protein_coding       | 1.32E-25  | -1.682 |
| NUDT3         | protein_coding       | 1.06E-13  | -1.683 |
| SMARCC1       | protein_coding       | 1.35E-26  | -1.686 |
| DESI1         | protein_coding       | 0.000886  | -1.686 |
| LGALS3        | protein_coding       | 5.03E-14  | -1.689 |
| TCTA          | protein_coding       | 0.000124  | -1.690 |
| SF3B5         | protein_coding       | 3.20E-05  | -1.693 |
| NBPF10        | protein_coding       | 2.57E-06  | -1.696 |
| APC           | protein_coding       | 1.42E-06  | -1.703 |
| MT-CYB        | protein_coding       | 9.70E-15  | -1.703 |
| RPL29         | protein_coding       | 6.83E-44  | -1.708 |
| NUAK1         | protein_coding       | 0.0001487 | -1.710 |
| CRIP2         | protein_coding       | 0.0190556 | -1.711 |
| H1-4          | protein_coding       | 3.61E-31  | -1.711 |
| ALAD          | protein_coding       | 2.21E-06  | -1.711 |
| RP11-371A22.1 |                      | 2.06E-11  | -1.713 |
| RPL24P4       | processed_pseudogene | 8.16E-05  | -1.719 |
| DDX24         | protein_coding       | 0.0247442 | -1.720 |
| KIF3B         | protein_coding       | 1.23E-18  | -1.720 |
| GSTP1         | protein_coding       | 1.92E-19  | -1.722 |
| MT-ND5        | protein_coding       | 4.68E-31  | -1.722 |
| BCYRN1        | scRNA                | 2.63E-07  | -1.727 |
| ZNF326        | protein_coding       | 5.66E-09  | -1.736 |
| C11orf68      | protein_coding       | 0.0003125 | -1.740 |
| PYCARD        | protein_coding       | 0.007504  | -1.742 |
| DYNC2I1       | protein_coding       | 5.99E-27  | -1.745 |
| RPLP0         | protein_coding       | 7.51E-44  | -1.745 |
| SLC24A1       | protein_coding       | 7.68E-07  | -1.747 |
| RPL13P12      | processed_pseudogene | 0.0097127 | -1.751 |
| TK1           | protein_coding       | 6.15E-11  | -1.753 |

|               |                                  |           |        |
|---------------|----------------------------------|-----------|--------|
| ZNF358        | protein_coding                   | 8.00E-05  | -1.758 |
| RPS28         | protein_coding                   | 2.26E-17  | -1.771 |
| HMGA1         | protein_coding                   | 8.86E-69  | -1.785 |
| RP11-543P15.1 |                                  | 0.0018943 | -1.786 |
| OCEL1         | protein_coding                   | 0.002525  | -1.788 |
| SH3BGRL3      | protein_coding                   | 1.51E-34  | -1.796 |
| MTCO1P12      | unprocessed_pseudogene           | 0.0083614 | -1.800 |
| PTPN11        | protein_coding                   | 3.36E-34  | -1.804 |
| MT-ATP8       | protein_coding                   | 9.44E-05  | -1.810 |
| BRK1          | protein_coding                   | 2.04E-07  | -1.811 |
| TXNRD3        | protein_coding                   | 0.0009131 | -1.816 |
| NIPSNAP3A     | protein_coding                   | 0.0021143 | -1.861 |
| ATG4D         | protein_coding                   | 0.004256  | -1.868 |
| UNG           | protein_coding                   | 0.0003602 | -1.872 |
| ASPHD1        | protein_coding                   | 0.0030674 | -1.877 |
| ALKBH7        | protein_coding                   | 5.33E-05  | -1.890 |
| SET           | protein_coding                   | 4.37E-66  | -1.910 |
| H3C13         | protein_coding                   | 0.0478123 | -1.911 |
| SH3RF2        | protein_coding                   | 2.36E-15  | -1.913 |
| RP1-278E11.3  |                                  | 0.0080924 | -1.920 |
| MAPKBP1       | protein_coding                   | 3.74E-08  | -1.922 |
| PINK1         | protein_coding                   | 5.41E-17  | -1.927 |
| GAB2          | protein_coding                   | 6.91E-13  | -1.936 |
| CHAF1A        | protein_coding                   | 8.07E-32  | -1.940 |
| TSNARE1       | protein_coding                   | 0.000118  | -1.946 |
| HCFC1R1       | protein_coding                   | 4.30E-09  | -1.946 |
| NSRP1         | protein_coding                   | 1.57E-34  | -1.947 |
| RPL18AP3      | processed_pseudogene             | 2.32E-07  | -1.949 |
| PALLD         | protein_coding                   | 2.61E-33  | -1.990 |
| TCEAL4        | protein_coding                   | 4.18E-31  | -1.997 |
| ESF1          | protein_coding                   | 6.07E-26  | -1.997 |
| H2BC5         | protein_coding                   | 1.40E-24  | -2.002 |
| H2BC12        | protein_coding                   | 2.83E-38  | -2.002 |
| PPDPF         | protein_coding                   | 8.43E-24  | -2.003 |
| RNY1          | misc_RNA                         | 5.15E-25  | -2.013 |
| RNY3          | misc_RNA                         | 1.92E-25  | -2.017 |
| RN7SL5P       | misc_RNA                         | 0.0140611 | -2.018 |
| H4C8          | protein_coding                   | 6.10E-05  | -2.022 |
| APOO          | protein_coding                   | 0.0008187 | -2.023 |
| H4C2          | protein_coding                   | 1.23E-17  | -2.038 |
| NAP1L1        | protein_coding                   | 8.97E-53  | -2.043 |
| MT-ATP6       | protein_coding                   | 2.26E-13  | -2.058 |
| MT-CO3        | protein_coding                   | 2.34E-22  | -2.078 |
| AC004057.1    | transcribed_processed_pseudogene | 0.0009077 | -2.090 |
| RAI14         | protein_coding                   | 7.87E-45  | -2.096 |
| RP5-1182A14.7 |                                  | 0.0390269 | -2.110 |

|               |                                  |           |        |
|---------------|----------------------------------|-----------|--------|
| DYNC1LI2      | protein_coding                   | 1.09E-21  | -2.114 |
| MAP4K4        | protein_coding                   | 3.04E-90  | -2.139 |
| KCNK6         | protein_coding                   | 1.36E-08  | -2.144 |
| H1-2          | protein_coding                   | 3.17E-56  | -2.146 |
| CDC42BPG      | protein_coding                   | 1.11E-15  | -2.148 |
| HNRNPH3       | protein_coding                   | 1.02E-51  | -2.162 |
| MT-RNR1       | Mt_rRNA                          | 3.78E-07  | -2.177 |
| MRPL23        | protein_coding                   | 0.0041176 | -2.181 |
| ADIRF         | protein_coding                   | 1.16E-05  | -2.202 |
| H2AC6         | protein_coding                   | 2.19E-22  | -2.203 |
| H2AC14        | protein_coding                   | 8.88E-17  | -2.220 |
| WWTR1         | protein_coding                   | 1.86E-33  | -2.224 |
| FBXL19-AS1    | lncRNA                           | 9.23E-07  | -2.228 |
| H2AC20        | protein_coding                   | 4.54E-18  | -2.241 |
| H2BC15        | protein_coding                   | 2.25E-12  | -2.273 |
| H2BC4         | protein_coding                   | 1.32E-48  | -2.312 |
| ZBTB47        | protein_coding                   | 2.27E-17  | -2.321 |
| H4C12         | protein_coding                   | 0.0013607 | -2.335 |
| MT-ND2        | protein_coding                   | 3.35E-41  | -2.337 |
| VTRNA1-2      | misc_RNA                         | 0.0386875 | -2.364 |
| H4-16         | protein_coding                   | 0.0016278 | -2.371 |
| RP11-644F5.11 |                                  | 0.000583  | -2.378 |
| ABLIM3        | protein_coding                   | 8.33E-19  | -2.382 |
| MT-ND1        | protein_coding                   | 2.53E-38  | -2.385 |
| PLEKHA4       | protein_coding                   | 1.49E-39  | -2.387 |
| H2BC18        | protein_coding                   | 2.44E-23  | -2.395 |
| TCEAL3        | protein_coding                   | 5.94E-27  | -2.398 |
| MTATP6P1      | unprocessed_pseudogene           | 1.12E-08  | -2.399 |
| MT-CO1        | protein_coding                   | 2.11E-72  | -2.400 |
| SYNJ2BP       | protein_coding                   | 7.61E-10  | -2.449 |
| MT-ND3        | protein_coding                   | 0.0001231 | -2.476 |
| H2AC13        | protein_coding                   | 6.47E-10  | -2.490 |
| MT-ND4        | protein_coding                   | 1.09E-53  | -2.502 |
| ANXA8L1       | protein_coding                   | 0.000687  | -2.504 |
| MT-RNR2       | Mt_rRNA                          | 7.94E-58  | -2.506 |
| H2AC12        | protein_coding                   | 7.04E-22  | -2.530 |
| CENPB         | protein_coding                   | 7.99E-29  | -2.540 |
| PKP4          | protein_coding                   | 2.02E-68  | -2.543 |
| MT-ND4L       | protein_coding                   | 2.01E-05  | -2.546 |
| H4C1          | protein_coding                   | 0.0003206 | -2.548 |
| NBPF14        | protein_coding                   | 1.20E-29  | -2.562 |
| RPS27AP16     | transcribed_processed_pseudogene | 0.0187873 | -2.565 |
| PFN1P1        | processed_pseudogene             | 0.000611  | -2.569 |
| LPAR1         | protein_coding                   | 6.24E-29  | -2.574 |
| H2BC11        | protein_coding                   | 6.05E-24  | -2.574 |
| GDF11         | protein_coding                   | 1.62E-25  | -2.584 |

|               |                                |           |        |
|---------------|--------------------------------|-----------|--------|
| MT-TW         | Mt_tRNA                        | 0.0013838 | -2.584 |
| MT-CO2        | protein_coding                 | 8.76E-79  | -2.588 |
| H3C1          | protein_coding                 | 0.0001014 | -2.603 |
| TTLL11        | protein_coding                 | 3.77E-15  | -2.603 |
| PURA          | protein_coding                 | 1.92E-32  | -2.604 |
| H4C3          | protein_coding                 | 5.26E-18  | -2.615 |
| H2BC21        | protein_coding                 | 1.21E-11  | -2.617 |
| H2AC15        | protein_coding                 | 1.03E-10  | -2.641 |
| SAMD4A        | protein_coding                 | 2.56E-32  | -2.647 |
| SLC25A6       | protein_coding                 | 2.91E-05  | -2.705 |
| LINC00638     | lncRNA                         | 0.0011333 | -2.710 |
| YJEFN3        | protein_coding                 | 4.46E-23  | -2.756 |
| SNX8          | protein_coding                 | 5.48E-39  | -2.778 |
| H2AC4         | protein_coding                 | 8.40E-11  | -2.788 |
| RNY4          | misc_RNA                       | 5.95E-09  | -2.793 |
| H2AC11        | protein_coding                 | 3.26E-55  | -2.808 |
| H2BC13        | protein_coding                 | 1.68E-06  | -2.810 |
| H2BC14        | protein_coding                 | 9.16E-05  | -2.811 |
| H3C2          | protein_coding                 | 3.16E-55  | -2.827 |
| MTURN         | protein_coding                 | 1.76E-28  | -2.866 |
| EIF3CL        | protein_coding                 | 0.0126975 | -2.872 |
| H2BC3         | protein_coding                 | 2.09E-21  | -2.903 |
| IFI27         | protein_coding                 | 3.53E-05  | -2.923 |
| UACA          | protein_coding                 | 1.25E-89  | -2.946 |
| H3C3          | protein_coding                 | 3.66E-52  | -2.981 |
| ZEB1          | protein_coding                 | 1.96E-111 | -2.988 |
| H2AC21        | protein_coding                 | 2.09E-22  | -2.995 |
| PITPNM3       | protein_coding                 | 2.59E-78  | -3.002 |
| LACC1         | protein_coding                 | 1.39E-16  | -3.040 |
| ARRDC4        | protein_coding                 | 2.04E-08  | -3.076 |
| H2BC17        | protein_coding                 | 4.01E-46  | -3.103 |
| H3C10         | protein_coding                 | 5.04E-21  | -3.221 |
| ANP32B        | protein_coding                 | 5.72E-117 | -3.224 |
| TP53INP2      | protein_coding                 | 1.82E-39  | -3.241 |
| IGIP          | protein_coding                 | 5.91E-09  | -3.298 |
| BCL2L2        | protein_coding                 | 1.19E-33  | -3.328 |
| NUDT16        | protein_coding                 | 1.84E-55  | -3.431 |
| SH3PXD2A      | protein_coding                 | 2.76E-96  | -3.433 |
| CRTAP         | protein_coding                 | 9.71E-143 | -3.441 |
| H4C11         | protein_coding                 | 2.83E-05  | -3.492 |
| PGPEP1        | protein_coding                 | 7.71E-73  | -3.545 |
| ZSWIM9        | protein_coding                 | 5.21E-47  | -3.631 |
| C22orf46      | transcribed_unitary_pseudogene | 3.46E-167 | -3.653 |
| CTD-3099C6.13 |                                | 8.58E-120 | -3.724 |
| FBXW4         | protein_coding                 | 2.42E-50  | -3.742 |
| RAB13         | protein_coding                 | 2.47E-96  | -3.892 |

|               |                      |           |        |
|---------------|----------------------|-----------|--------|
| RASSF3        | protein_coding       | 9.52E-168 | -3.969 |
| KIF1C         | protein_coding       | 0         | -4.046 |
| TRAK2         | protein_coding       | 5.02E-249 | -4.174 |
| NET1          | protein_coding       | 0         | -4.432 |
| RP11-603J24.7 | processed_pseudogene | 3.44E-95  | -4.460 |



**Supplementary Table S5. Full list of differentially expressed small RNAs (i.e. miRNAs, snoRNAs, piRNAs and tRNA-derived fragments).** The table shows gene name, gene type, amount of differential expression in terms of logarithm of the base 2 of the Fold change (log2FC), adjusted P-value.

| Name          | Official Name | adjusted p-value | log2(FoldChange) |
|---------------|---------------|------------------|------------------|
| HBII-419      | SNORD98       | 0.001945745      | 4.031            |
| HBI-115       | SNORA47       | 2.34E-11         | 3.551            |
| HBII-239      | SNORD71       | 2.83E-08         | 3.250            |
| U106          | SNORD12C      | 0.003250867      | 3.134            |
| U28           | SNORD28       | 2.34E-11         | 3.066            |
| piR-hsa-23566 | piR-hsa-23566 | 1.54E-05         | 3.010            |
| U37           | SNORD37       | 0.000450443      | 2.870            |
| HBII-295      | SNORD90       | 0.004611853      | 2.715            |
| U18B          | SNORD18B      | 0.00603962       | 2.710            |
| SNORD127      | SNORD127      | 0.012604674      | 2.672            |
| E2            | SNORA62       | 2.61E-10         | 2.555            |
| HBII-108B     | SNORD19B      | 0.029368823      | 2.480            |
| U83A          | SNORD83A      | 3.60E-08         | 2.345            |
| piR-hsa-1834  | piR-hsa-1834  | 0.011518158      | 2.340            |
| U46           | SNORD46       | 0.000138538      | 2.333            |
| piR-hsa-26039 | piR-hsa-26039 | 1.01E-05         | 2.325            |
| U34           | SNORD34       | 0.033602158      | 2.274            |
| U78           | SNORD78       | 1.64E-07         | 2.203            |
| SNORD123      | SNORD123      | 0.000140412      | 2.179            |
| U49A          | SNORD49A      | 1.54E-05         | 2.154            |
| U38A          | SNORD38A      | 0.001804525      | 2.104            |
| U44           | SNORD44       | 1.01E-07         | 2.026            |
| U42B          | SNORD42B      | 0.011518158      | 2.009            |
| snR38C        | SNORD1C       | 0.004030615      | 1.997            |
| ACA55         | SNORA55       | 0.015115556      | 1.992            |
| piR-hsa-963   | piR-hsa-963   | 0.011808293      | 1.988            |
| HBII-99B      | SNORD12B      | 0.044876368      | 1.965            |
| U47           | SNORD47       | 0.000184785      | 1.947            |
| hsa-let-7a-5p | hsa-let-7a-5p | 2.68E-05         | 1.894            |
| U14B          | SNORD14B      | 0.037426583      | 1.892            |
| U105B         | SNORD105B     | 0.012024773      | 1.875            |
| snR38B        | SNORD1B       | 0.000208326      | 1.857            |
| HBII-135      | SNORD65       | 0.01760122       | 1.842            |
| U36B          | SNORD36B      | 0.012024773      | 1.808            |
| hsa-miR-17-3p | hsa-miR-17-3p | 0.031526296      | 1.801            |

|                  |                  |             |        |
|------------------|------------------|-------------|--------|
| U75              | SNORD75          | 0.031526296 | 1.786  |
| tRFdb-5026a-435  | tRFdb-5026a-435  | 0.000551326 | 1.759  |
| U27              | SNORD27          | 0.030951235 | 1.750  |
| hsa-let-7f-5p_1  | hsa-let-7f-5p_1  | 1.79E-05    | 1.692  |
| hsa-let-7f-5p    | hsa-let-7f-5p    | 0.000489777 | 1.664  |
| piR-hsa-11360    | piR-hsa-11360    | 0.000501853 | 1.663  |
| U94              | SNORD94          | 0.00014761  | 1.661  |
| ACA43            | SNORA43          | 0.003158675 | 1.602  |
| U3               | SNORD3@          | 0.027085968 | 1.594  |
| piR-hsa-24000    | piR-hsa-24000    | 0.026917937 | 1.554  |
| HBII-99          | SNORD12          | 0.01828989  | 1.552  |
| U41              | SNORD41          | 0.003655502 | 1.547  |
| piR-hsa-20757    | piR-hsa-20757    | 0.021170337 | 1.535  |
| U18A             | SNORD18A         | 0.02028284  | 1.533  |
| mgU2-19/30       | SCARNA9          | 0.046725168 | 1.525  |
| hsa-miR-29a-3p   | hsa-miR-29a-3p   | 3.42E-05    | 1.513  |
| hsa-let-7a-5p_2  | hsa-let-7a-5p    | 0.003303137 | 1.496  |
| U45A             | SNORD45A         | 0.040556392 | 1.483  |
| piR-hsa-1338     | piR-hsa-1338     | 0.003963276 | 1.454  |
| mgh28S-2411      | SNORD6           | 0.002968098 | 1.448  |
| U74              | SNORD74          | 0.001758718 | 1.443  |
| hsa-miR-126-3p   | hsa-miR-126-3p   | 2.76E-07    | 1.442  |
| U38B             | SNORD38B         | 0.023662453 | 1.409  |
| piR-hsa-11361    | piR-hsa-11361    | 0.001860243 | 1.395  |
| hsa-miR-151a-5p  | hsa-miR-151a-5p  | 0.044876368 | 1.375  |
| U29              | SNORD29          | 0.00816336  | 1.326  |
| hsa-miR-30b-5p   | hsa-miR-30b-5p   | 6.17E-06    | 1.317  |
| U22              | SNORD22          | 0.004622223 | 1.299  |
| U14A             | SNORD14A         | 0.007972601 | 1.280  |
| hsa-miR-150-5p   | hsa-miR-150-5p   | 0.036637167 | 1.274  |
| HBII-210         | SNORD69          | 0.016859984 | 1.265  |
| hsa-miR-30c-5p_1 | hsa-miR-30c-5p   | 0.004771216 | 1.225  |
| U73a             | SNORD73A         | 0.023973    | 1.201  |
| U102             | SNORD102         | 0.006202267 | 1.201  |
| U82              | SNORD82          | 0.041143864 | 1.187  |
| hsa-let-7e-5p    | hsa-let-7e-5p    | 0.005438103 | 1.184  |
| hsa-let-7b-5p    | hsa-let-7b-5p    | 0.041626029 | 1.182  |
| U109             | SCARNA18         | 0.029368823 | 1.110  |
| U57              | SNORD57          | 4.11E-05    | 1.109  |
| hsa-miR-30c-2-3p | hsa-miR-30c-2-3p | 0.016772502 | 1.065  |
| U83B             | SNORD83B         | 0.023973    | 1.047  |
| U65              | SNORA65          | 0.045915112 | 1.042  |
| hsa-miR-30a-5p   | hsa-miR-30a-5p   | 0.00092912  | 1.035  |
| tRFdb-5020a-338  | tRFdb-5020a-338  | 0.000716457 | 1.023  |
| hsa-miR-29c-3p   | hsa-miR-29c-3p   | 0.002198833 | 1.009  |
| hsa-miR-92b-3p   | hsa-miR-92b-3p   | 0.019620441 | -1.038 |

|                     |                     |             |        |
|---------------------|---------------------|-------------|--------|
| U59B                | SNORD59B            | 0.024351039 | -1.078 |
| hsa-miR-671-5p      | hsa-miR-671-5p      | 0.027319547 | -1.130 |
| tRFdb-5032a-504     | tRFdb-5032a-504     | 6.17E-06    | -1.144 |
| hsa-let-7d-3p       | hsa-let-7d-3p       | 0.003492552 | -1.168 |
| SNORA38B            | SNORA38B            | 0.044755394 | -1.304 |
| ACA21               | SNORA21             | 0.007699912 | -1.342 |
| U71a                | SNORA71A            | 0.02028284  | -1.380 |
| hsa-miR-942-5p      | hsa-miR-942-5p      | 0.016679904 | -1.421 |
| hsa-miR-125b-5p_1   | hsa-miR-125b-5p     | 0.02651708  | -1.453 |
| hsa-miR-450b-5p     | hsa-miR-450b-5p     | 0.016772502 | -1.579 |
| 5P_tRNA-Ser-TGA-1-1 | 5P_tRNA-Ser-TGA-1-1 | 0.032083442 | -1.587 |
| U80                 | SNORD80             | 0.005438103 | -1.617 |
| hsa-miR-379-5p      | hsa-miR-379-5p      | 0.034147577 | -1.663 |
| HBII-429            | SNORD100            | 7.60E-05    | -1.673 |
| hsa-miR-451a        | hsa-miR-451a        | 0.012552502 | -1.745 |
| piR-hsa-2491        | piR-hsa-2491        | 0.037882925 | -1.818 |
| hsa-miR-148a-3p     | hsa-miR-148a-3p     | 0.02973412  | -1.852 |
| hsa-miR-335-3p      | hsa-miR-335-3p      | 0.031627236 | -1.898 |
| piR-hsa-32299       | piR-hsa-32299       | 0.031526296 | -1.971 |
| hsa-miR-125a-5p     | hsa-miR-125a-5p     | 1.11E-05    | -1.993 |
| hsa-miR-671-3p      | hsa-miR-671-3p      | 0.013442311 | -2.012 |
| piR-hsa-7695        | piR-hsa-7695        | 0.005360417 | -2.031 |
| hsa-miR-1296-5p     | hsa-miR-1296-5p     | 0.00266175  | -2.050 |
| hsa-miR-497-5p      | hsa-miR-497-5p      | 0.036515117 | -2.124 |
| ACA62               | SNORA76             | 1.79E-05    | -2.151 |
| tRFdb-3004a-618     | tRFdb-3004a-618     | 0.011444528 | -2.165 |
| hsa-miR-576-5p      | hsa-miR-576-5p      | 0.006531813 | -2.175 |
| hsa-miR-486-5p      | hsa-miR-486-5p      | 0.000385341 | -2.187 |
| piR-hsa-20230       | piR-hsa-20230       | 0.031526296 | -2.212 |
| piR-hsa-30636       | piR-hsa-30636       | 0.013106285 | -2.226 |
| hsa-miR-144-5p      | hsa-miR-144-5p      | 1.32E-06    | -2.263 |
| hsa-miR-197-3p      | hsa-miR-197-3p      | 1.79E-05    | -2.297 |
| hsa-miR-494-3p      | hsa-miR-494-3p      | 0.016434456 | -2.341 |
| hsa-miR-874-3p      | hsa-miR-874-3p      | 0.044787273 | -2.401 |
| tRFdb-5011a-129     | tRFdb-5011a-129     | 0.049313626 | -2.415 |
| piR-hsa-1593        | piR-hsa-1593        | 0.048719427 | -2.417 |
| hsa-miR-381-3p      | hsa-miR-381-3p      | 0.041143864 | -2.432 |
| hsa-miR-127-3p      | hsa-miR-127-3p      | 0.000170038 | -2.436 |
| piR-hsa-426         | piR-hsa-426         | 0.039076393 | -2.438 |
| piR-hsa-13633       | piR-hsa-13633       | 0.035680541 | -2.469 |
| hsa-miR-1307-3p     | hsa-miR-1307-3p     | 3.35E-12    | -2.516 |
| U8                  | SNORD118            | 0.023973    | -2.589 |
| hsa-miR-3615        | hsa-miR-3615        | 0.002737401 | -2.636 |
| hsa-miR-122-5p      | hsa-miR-122-5p      | 0.021222107 | -2.698 |
| U89                 | SCARNA12            | 0.023973    | -2.794 |
| ts-103              | ts-103              | 0.003655502 | -2.852 |

|                     |                     |             |        |
|---------------------|---------------------|-------------|--------|
| hsa-miR-432-5p      | hsa-miR-432-5p      | 0.001945745 | -2.888 |
| hsa-miR-144-3p      | hsa-miR-144-3p      | 0.00355425  | -2.896 |
| hsa-miR-328-3p      | hsa-miR-328-3p      | 1.67E-07    | -2.916 |
| piR-hsa-30734       | piR-hsa-30734       | 0.008418354 | -2.927 |
| ts-47               | ts-47               | 0.009467337 | -2.973 |
| piR-hsa-23679       | piR-hsa-23679       | 0.000450443 | -3.007 |
| hsa-miR-369-3p      | hsa-miR-369-3p      | 0.000714419 | -3.037 |
| 5P_tRNA-Leu-TAA-1-1 | 5P_tRNA-Leu-TAA-1-1 | 0.00417747  | -3.096 |
| piR-hsa-22021       | piR-hsa-22021       | 0.002780882 | -3.132 |
| piR-hsa-23317       | piR-hsa-23317       | 0.012024773 | -3.149 |
| ACA8                | SNORA8              | 0.01828989  | -3.238 |
| hTR                 | TERC                | 0.00790365  | -3.260 |
| piR-hsa-27728       | piR-hsa-27728       | 0.012629649 | -3.414 |
| hsa-miR-136-3p      | hsa-miR-136-3p      | 0.004793526 | -3.504 |
| piR-hsa-7201        | piR-hsa-7201        | 0.000406054 | -3.541 |
| piR-hsa-21000       | piR-hsa-21000       | 0.002517521 | -3.577 |
| piR-hsa-27007       | piR-hsa-27007       | 0.012863505 | -3.609 |
| hsa-miR-3605-3p     | hsa-miR-3605-3p     | 0.000140286 | -3.624 |
| piR-hsa-28634       | piR-hsa-28634       | 0.00346579  | -3.663 |
| piR-hsa-14870       | piR-hsa-14870       | 0.00180319  | -3.716 |
| hsa-miR-193a-5p     | hsa-miR-193a-5p     | 0.000102838 | -3.754 |
| piR-hsa-9104        | piR-hsa-9104        | 4.68E-06    | -3.822 |
| piR-hsa-19996       | piR-hsa-19996       | 0.002290491 | -3.902 |
| piR-hsa-27282       | piR-hsa-27282       | 0.001235256 | -3.956 |
| hsa-miR-214-3p      | hsa-miR-214-3p      | 0.001705624 | -3.956 |
| piR-hsa-26925       | piR-hsa-26925       | 0.000162689 | -3.992 |
| piR-hsa-11256       | piR-hsa-11256       | 6.17E-06    | -4.008 |
| mgU2-25/61          | SCARNA2             | 0.000170038 | -4.024 |
| piR-hsa-23387       | piR-hsa-23387       | 0.005338547 | -4.176 |
| piR-hsa-23919       | piR-hsa-23919       | 0.000296953 | -4.306 |
| piR-hsa-28212       | piR-hsa-28212       | 0.008025178 | -4.316 |
| piR-hsa-23670       | piR-hsa-23670       | 0.001523838 | -4.387 |
| piR-hsa-7193        | piR-hsa-7193        | 0.00266175  | -4.456 |
| piR-hsa-27513       | piR-hsa-27513       | 0.000726201 | -4.528 |
| tRFdb-3004a-617     | tRFdb-3004a-617     | 4.84E-05    | -4.730 |
| hsa-miR-155-5p      | hsa-miR-155-5p      | 7.75E-06    | -4.824 |
| ts-112              | ts-112              | 1.59E-05    | -4.833 |
| piR-hsa-7116        | piR-hsa-7116        | 7.12E-06    | -4.912 |
| piR-hsa-28382       | piR-hsa-28382       | 0.000118001 | -5.091 |
| piR-hsa-17793       | piR-hsa-17793       | 0.00086163  | -5.320 |
| piR-hsa-2467        | piR-hsa-2467        | 3.59E-05    | -5.486 |
| piR-hsa-28205       | piR-hsa-28205       | 0.000108844 | -5.755 |
| 5P_tRNA-His-GTG-1-8 | 5P_tRNA-His-GTG-1-8 | 4.44E-05    | -6.275 |
| piR-hsa-28478       | piR-hsa-28478       | 0.00050761  | -6.291 |
| piR-hsa-5939        | piR-hsa-5939        | 3.80E-07    | -6.562 |
| piR-hsa-25046       | piR-hsa-25046       | 7.45E-08    | -6.671 |

|                 |                 |            |         |
|-----------------|-----------------|------------|---------|
| ts-44           | ts-44           | 1.02E-05   | -7.335  |
| piR-hsa-12789   | piR-hsa-12789   | 0.00014761 | -7.417  |
| hsa-miR-6087    | hsa-miR-6087    | 2.68E-05   | -7.987  |
| hsa-miR-1306-5p | hsa-miR-1306-5p | 5.79E-16   | -8.193  |
| hsa-miR-196b-5p | hsa-miR-196b-5p | 2.07E-05   | -8.454  |
| piR-hsa-9105    | piR-hsa-9105    | 1.64E-07   | -9.148  |
| piR-hsa-12275   | piR-hsa-12275   | 2.15E-07   | -10.756 |

**Supplementary Table S6. Enrichment Pathway analysis of up-regulated genes.**

| GO BP                                                                            | adj. P-value |
|----------------------------------------------------------------------------------|--------------|
| extracellular structure organization (GO:0043062)                                | 7.46E-13     |
| external encapsulating structure organization (GO:0045229)                       | 1.88E-12     |
| extracellular matrix organization (GO:0030198)                                   | 1.04E-10     |
| homophilic cell adhesion via plasma membrane adhesion molecules (GO:0007156)     | 8.53E-10     |
| axon guidance (GO:0007411)                                                       | 9.00E-10     |
| axonogenesis (GO:0007409)                                                        | 1.30E-08     |
| lipid translocation (GO:0034204)                                                 | 3.20E-08     |
| cell-cell adhesion via plasma-membrane adhesion molecules (GO:0098742)           | 9.57E-08     |
| phospholipid translocation (GO:0045332)                                          | 0.000004512  |
| collagen fibril organization (GO:0030199)                                        | 0.000004512  |
| synapse organization (GO:0050808)                                                | 0.00001251   |
| transport across blood-brain barrier (GO:0150104)                                | 0.00002676   |
| nervous system development (GO:0007399)                                          | 0.0000271    |
| regulation of dendrite development (GO:0050773)                                  | 0.00002748   |
| vascular transport (GO:0010232)                                                  | 0.00005104   |
| phospholipid transport (GO:0015914)                                              | 0.00005137   |
| neuron migration (GO:0001764)                                                    | 0.00005602   |
| regulation of cell migration (GO:0030334)                                        | 0.00005987   |
| calcium ion transport (GO:0006816)                                               | 0.00009035   |
| neuron projection morphogenesis (GO:0048812)                                     | 0.0001148    |
| negative regulation of cell adhesion (GO:0007162)                                | 0.0001295    |
| negative regulation of chemotaxis (GO:0050922)                                   | 0.0002193    |
| regulation of NMDA receptor activity (GO:2000310)                                | 0.0002193    |
| aorta development (GO:0035904)                                                   | 0.0002911    |
| negative chemotaxis (GO:0050919)                                                 | 0.0003171    |
| neuronal action potential (GO:0019228)                                           | 0.0005497    |
| membrane depolarization during action potential (GO:0086010)                     | 0.0005497    |
| modulation of chemical synaptic transmission (GO:0050804)                        | 0.0006166    |
| semaphorin-plexin signaling pathway (GO:0071526)                                 | 0.0006344    |
| action potential (GO:0001508)                                                    | 0.0007905    |
| membrane depolarization (GO:0051899)                                             | 0.001068     |
| regulation of axon extension involved in axon guidance (GO:0048841)              | 0.0013       |
| cilium movement (GO:0003341)                                                     | 0.001352     |
| lipid phosphorylation (GO:0046834)                                               | 0.001422     |
| positive regulation of cell migration (GO:0030335)                               | 0.001682     |
| membrane depolarization during cardiac muscle cell action potential (GO:0086012) | 0.001764     |
| cation transport (GO:0006812)                                                    | 0.00179      |
| chloride transport (GO:0006821)                                                  | 0.002151     |
| inorganic anion transmembrane transport (GO:0098661)                             | 0.002167     |
| chloride transmembrane transport (GO:1902476)                                    | 0.002584     |
| regulation of cation channel activity (GO:2001257)                               | 0.002584     |
| regulation of endothelial cell migration (GO:0010594)                            | 0.002584     |
| central nervous system development (GO:0007417)                                  | 0.002584     |
| negative regulation of axon extension (GO:0030517)                               | 0.002962     |
| sodium ion transport (GO:0006814)                                                | 0.002962     |
| positive regulation of cell motility (GO:2000147)                                | 0.003101     |
| cilium-dependent cell motility (GO:0060285)                                      | 0.00399      |
| glutamate receptor signaling pathway (GO:0007215)                                | 0.004311     |

|                                                                                         |          |
|-----------------------------------------------------------------------------------------|----------|
| synapse assembly (GO:0007416)                                                           | 0.004325 |
| eye photoreceptor cell differentiation (GO:0001754)                                     | 0.00529  |
| aminophospholipid transport (GO:0015917)                                                | 0.005396 |
| positive regulation of axonogenesis (GO:0050772)                                        | 0.005396 |
| neuromuscular junction development (GO:0007528)                                         | 0.005505 |
| negative regulation of axon extension involved in axon guidance (GO:0048843)            | 0.005978 |
| xenobiotic transport (GO:0042908)                                                       | 0.005978 |
| protein O-linked glycosylation (GO:0006493)                                             | 0.006804 |
| cAMP-mediated signaling (GO:0019933)                                                    | 0.007744 |
| semaphorin-plexin signaling pathway involved in neuron projection guidance (GO:1902285) | 0.008997 |
| regulation of synaptic transmission, glutamatergic (GO:0051966)                         | 0.01081  |
| positive regulation of cation transmembrane transport (GO:1904064)                      | 0.01149  |
| cyclic-nucleotide-mediated signaling (GO:0019935)                                       | 0.0116   |
| peptidyl-tyrosine phosphorylation (GO:0018108)                                          | 0.0116   |
| cellular response to purine-containing compound (GO:0071415)                            | 0.01178  |
| negative regulation of cAMP-mediated signaling (GO:0043951)                             | 0.01178  |
| regulation of neurotransmitter receptor activity (GO:0099601)                           | 0.01194  |
| regulation of kinase activity (GO:0043549)                                              | 0.01194  |
| inorganic cation transmembrane transport (GO:0098662)                                   | 0.01194  |
| cellular response to caffeine (GO:0071313)                                              | 0.01227  |
| regulation of cilium beat frequency (GO:0003356)                                        | 0.01227  |
| response to caffeine (GO:0031000)                                                       | 0.01227  |
| SA node cell action potential (GO:0086015)                                              | 0.01227  |
| enzyme linked receptor protein signaling pathway (GO:0007167)                           | 0.01227  |
| regulation of cardiac muscle cell contraction (GO:0086004)                              | 0.01286  |
| chemical synaptic transmission (GO:0007268)                                             | 0.01286  |
| phosphatidylinositol-mediated signaling (GO:0048015)                                    | 0.01376  |
| positive regulation of phosphatidylinositol 3-kinase signaling (GO:0014068)             | 0.01376  |
| diacylglycerol metabolic process (GO:0046339)                                           | 0.01558  |
| brain development (GO:0007420)                                                          | 0.0163   |
| positive regulation of synapse assembly (GO:0051965)                                    | 0.01675  |
| muscle cell development (GO:0055001)                                                    | 0.01675  |
| sensory perception of sound (GO:0007605)                                                | 0.01684  |
| anterograde trans-synaptic signaling (GO:0098916)                                       | 0.01775  |
| insulin-like growth factor receptor signaling pathway (GO:0048009)                      | 0.01801  |
| positive regulation of potassium ion transmembrane transport (GO:1901381)               | 0.01801  |
| supramolecular fiber organization (GO:0097435)                                          | 0.01925  |
| regulation of phosphatidylinositol 3-kinase signaling (GO:0014066)                      | 0.02183  |
| calcium ion transmembrane transport (GO:0070588)                                        | 0.02273  |
| membrane depolarization during SA node cell action potential (GO:0086046)               | 0.02461  |
| protein localization to axon (GO:0099612)                                               | 0.02461  |
| SA node cell to atrial cardiac muscle cell signaling (GO:0086018)                       | 0.02461  |
| positive regulation of cell junction assembly (GO:1901890)                              | 0.02461  |
| metal ion transport (GO:0030001)                                                        | 0.02488  |
| sensory perception of mechanical stimulus (GO:0050954)                                  | 0.02488  |
| cellular response to amyloid-beta (GO:1904646)                                          | 0.02503  |
| muscle cell differentiation (GO:0042692)                                                | 0.02503  |
| artery morphogenesis (GO:0048844)                                                       | 0.02581  |
| cardiac muscle cell action potential (GO:0086001)                                       | 0.02581  |
| cell morphogenesis involved in neuron differentiation (GO:0048667)                      | 0.0261   |
| basement membrane organization (GO:0071711)                                             | 0.02629  |
| dendrite self-avoidance (GO:0070593)                                                    | 0.02629  |
| glomerular visceral epithelial cell differentiation (GO:0072112)                        | 0.02677  |
| negative regulation of vascular permeability (GO:0043116)                               | 0.02677  |

|                                                                                          |                     |
|------------------------------------------------------------------------------------------|---------------------|
| protein localization to synapse (GO:0035418)                                             | 0.02677             |
| import into cell (GO:0098657)                                                            | 0.02677             |
| regulation of neuron projection development (GO:0010975)                                 | 0.02985             |
| positive regulation of cell projection organization (GO:0031346)                         | 0.03177             |
| endothelial cell development (GO:0001885)                                                | 0.0319              |
| positive regulation of ion transmembrane transporter activity (GO:0032414)               | 0.0319              |
| calcium ion transmembrane import into cytosol (GO:0097553)                               | 0.03214             |
| heterophilic cell-cell adhesion via plasma membrane cell adhesion molecules (GO:0007157) | 0.03214             |
| positive regulation of cardiac muscle tissue growth (GO:0055023)                         | 0.03605             |
| pulmonary valve morphogenesis (GO:0003184)                                               | 0.03605             |
| regulation of cellular response to growth factor stimulus (GO:0090287)                   | 0.03605             |
| neuronal ion channel clustering (GO:0045161)                                             | 0.03759             |
| semaphorin-plexin signaling pathway involved in axon guidance (GO:1902287)               | 0.03759             |
| endodermal cell differentiation (GO:0035987)                                             | 0.03759             |
| neurotransmitter transport (GO:0006836)                                                  | 0.03759             |
| positive regulation of synaptic transmission (GO:0050806)                                | 0.03759             |
| positive regulation of sodium ion transport (GO:0010765)                                 | 0.03934             |
| regulation of cardiac conduction (GO:1903779)                                            | 0.0397              |
| actin-myosin filament sliding (GO:0033275)                                               | 0.04137             |
| muscle filament sliding (GO:0030049)                                                     | 0.04137             |
| positive regulation of potassium ion transport (GO:0043268)                              | 0.04137             |
| cell-matrix adhesion (GO:0007160)                                                        | 0.04137             |
| sodium ion transmembrane transport (GO:0035725)                                          | 0.04204             |
| positive regulation of ion transport (GO:0043270)                                        | 0.04533             |
| peptidyl-tyrosine modification (GO:0018212)                                              | 0.04533             |
| cell migration involved in sprouting angiogenesis (GO:0002042)                           | 0.0466              |
| protein O-linked mannosylation (GO:0035269)                                              | 0.0466              |
| pulmonary valve development (GO:0003177)                                                 | 0.0466              |
| cellular response to organic cyclic compound (GO:0071407)                                | 0.0466              |
| positive regulation of cell communication (GO:0010647)                                   | 0.04698             |
| receptor clustering (GO:0043113)                                                         | 0.04698             |
| potassium ion transport (GO:0006813)                                                     | 0.04698             |
| regulation of heart rate by cardiac conduction (GO:0086091)                              | 0.04805             |
| skeletal system development (GO:0001501)                                                 | 0.04888             |
|                                                                                          |                     |
|                                                                                          |                     |
| <b>GO MF</b>                                                                             | <b>adj. P-value</b> |
| glycerophospholipid flippase activity (GO:0140333)                                       | 0.000006188         |
| voltage-gated calcium channel activity (GO:0005245)                                      | 0.00007446          |
| transmembrane receptor protein tyrosine kinase activity (GO:0004714)                     | 0.00007446          |
| transmembrane receptor protein kinase activity (GO:0019199)                              | 0.0002612           |
| ABC-type xenobiotic transporter activity (GO:0008559)                                    | 0.0002666           |
| transmembrane receptor protein phosphatase activity (GO:0019198)                         | 0.0009198           |
| transmembrane receptor protein tyrosine phosphatase activity (GO:0005001)                | 0.0009198           |
| voltage-gated cation channel activity (GO:0022843)                                       | 0.00128             |
| chemorepellent activity (GO:0045499)                                                     | 0.001464            |
| diacylglycerol kinase activity (GO:0004143)                                              | 0.00213             |
| voltage-gated sodium channel activity (GO:0005248)                                       | 0.00213             |
| calcium channel activity (GO:0005262)                                                    | 0.00213             |
| glutamate receptor activity (GO:0008066)                                                 | 0.002782            |
| semaphorin receptor binding (GO:0030215)                                                 | 0.002782            |
| chloride channel activity (GO:0005254)                                                   | 0.003192            |
| phosphatidylethanolamine flippase activity (GO:0090555)                                  | 0.003376            |
| ion channel activity (GO:0005216)                                                        | 0.004711            |



|                                                                                         |                     |
|-----------------------------------------------------------------------------------------|---------------------|
| ionotropic glutamate receptor activity (GO:0004970)                                     | 0.005837            |
| cation channel activity (GO:0005261)                                                    | 0.005837            |
| high voltage-gated calcium channel activity (GO:0008331)                                | 0.007022            |
| voltage-gated chloride channel activity (GO:0005247)                                    | 0.007022            |
| aminophospholipid flippase activity (GO:0015247)                                        | 0.007858            |
| sodium channel activity (GO:0005272)                                                    | 0.01088             |
| semaphorin receptor activity (GO:0017154)                                               | 0.01233             |
| transmitter-gated ion channel activity (GO:0022824)                                     | 0.01406             |
| L-leucine transmembrane transporter activity (GO:0015190)                               | 0.01461             |
| phosphatidylcholine flippase activity (GO:0140345)                                      | 0.01461             |
| phosphatidylserine flippase activity (GO:0140346)                                       | 0.01461             |
| voltage-gated calcium channel activity involved in cardiac muscle cell action potential | 0.01461             |
| PDZ domain binding (GO:0030165)                                                         | 0.01461             |
| protein tyrosine kinase activity (GO:0004713)                                           | 0.01567             |
| 3',5'-cyclic-nucleotide phosphodiesterase activity (GO:0004114)                         | 0.01987             |
| motor activity (GO:0003774)                                                             | 0.02283             |
| calcium ion binding (GO:0005509)                                                        | 0.02283             |
| GABA-gated chloride ion channel activity (GO:0022851)                                   | 0.02617             |
| amyloid-beta binding (GO:0001540)                                                       | 0.02643             |
| actin binding (GO:0003779)                                                              | 0.02696             |
| anion channel activity (GO:0005253)                                                     | 0.02799             |
| microtubule motor activity (GO:0003777)                                                 | 0.02888             |
| ligand-gated anion channel activity (GO:0099095)                                        | 0.02898             |
| phosphatidylcholine transporter activity (GO:0008525)                                   | 0.02898             |
| cyclic-nucleotide phosphodiesterase activity (GO:0004112)                               | 0.03023             |
| ankyrin binding (GO:0030506)                                                            | 0.03989             |
| ligand-gated channel activity (GO:0022834)                                              | 0.04796             |
| insulin-like growth factor binding (GO:0005520)                                         | 0.04949             |
|                                                                                         |                     |
|                                                                                         |                     |
| <b>GO CC</b>                                                                            | <b>adj. P-value</b> |
| integral component of plasma membrane (GO:0005887)                                      | 4.39E-10            |
| axon (GO:0030424)                                                                       | 1.83E-09            |
| neuron projection (GO:0043005)                                                          | 1.83E-09            |
| collagen-containing extracellular matrix (GO:0062023)                                   | 4.62E-07            |
| calcium channel complex (GO:0034704)                                                    | 0.00007643          |
| dendrite (GO:0030425)                                                                   | 0.00008868          |
| sodium channel complex (GO:0034706)                                                     | 0.0001061           |
| endoplasmic reticulum lumen (GO:0005788)                                                | 0.0003574           |
| voltage-gated sodium channel complex (GO:0001518)                                       | 0.0005942           |
| cell-cell junction (GO:0005911)                                                         | 0.0006117           |
| synaptic membrane (GO:0097060)                                                          | 0.0008103           |
| voltage-gated calcium channel complex (GO:0005891)                                      | 0.0009297           |
| basement membrane (GO:0005604)                                                          | 0.001221            |
| adherens junction (GO:0005912)                                                          | 0.001717            |
| dendrite membrane (GO:0032590)                                                          | 0.001985            |
| sarcoplasmic reticulum (GO:0016529)                                                     | 0.002578            |
| cytoskeleton of presynaptic active zone (GO:0048788)                                    | 0.004377            |
| catenin complex (GO:0016342)                                                            | 0.01488             |
| intercalated disc (GO:0014704)                                                          | 0.01488             |
| cell projection membrane (GO:0031253)                                                   | 0.01771             |
| potassium channel complex (GO:0034705)                                                  | 0.01951             |
| motile cilium (GO:0031514)                                                              | 0.02081             |
| smooth endoplasmic reticulum (GO:0005790)                                               | 0.0321              |

|                                                                                     |                     |
|-------------------------------------------------------------------------------------|---------------------|
| muscle myosin complex (GO:0005859)                                                  | 0.03853             |
| caveola (GO:0005901)                                                                | 0.03853             |
| cation channel complex (GO:0034703)                                                 | 0.03853             |
| platelet dense tubular network (GO:0031094)                                         | 0.04097             |
| endocytic vesicle membrane (GO:0030666)                                             | 0.04097             |
| postsynaptic density (GO:0014069)                                                   | 0.04685             |
| ionotropic glutamate receptor complex (GO:0008328)                                  | 0.04894             |
| actin cytoskeleton (GO:0015629)                                                     | 0.04894             |
|                                                                                     |                     |
|                                                                                     |                     |
| <b>BioPlanet 2019</b>                                                               | <b>adj. P-value</b> |
| Axon guidance                                                                       | 1.10E-11            |
| Interaction between L1-type proteins and ankyrins                                   | 1.18E-08            |
| ECM-receptor interaction                                                            | 3.30E-08            |
| ABC transporters                                                                    | 4.59E-08            |
| Collagen biosynthesis and modifying enzymes                                         | 4.59E-08            |
| Developmental biology                                                               | 4.59E-08            |
| L1CAM interactions                                                                  | 7.88E-08            |
| NCAM1 interactions                                                                  | 3.40E-07            |
| NCAM signaling for neurite out-growth                                               | 3.40E-07            |
| Arrhythmogenic right ventricular cardiomyopathy (ARVC)                              | 0.000001494         |
| Beta-1 integrin cell surface interactions                                           | 0.00000167          |
| Transmission across chemical synapses                                               | 0.00000261          |
| Ion channel transport                                                               | 0.000006253         |
| Transmembrane transport of small molecules                                          | 0.000006253         |
| Extracellular matrix organization                                                   | 0.000008971         |
| Ion transport by P-type ATPases                                                     | 0.00001108          |
| Neuronal system                                                                     | 0.0000176           |
| Syndecan 1 pathway                                                                  | 0.00009672          |
| PIP2 hydrolysis                                                                     | 0.0001219           |
| Dilated cardiomyopathy                                                              | 0.0001219           |
| Adrenergic pathway                                                                  | 0.0004167           |
| Nitric oxide stimulation of guanylate cyclase                                       | 0.0004667           |
| Integrins in angiogenesis                                                           | 0.0006068           |
| Focal adhesion                                                                      | 0.001279            |
| Integrin cell surface interactions                                                  | 0.001705            |
| Hemostasis pathway                                                                  | 0.001982            |
| Beta-3 integrin cell surface interactions                                           | 0.002683            |
| Platelet homeostasis                                                                | 0.002683            |
| G alpha s pathway                                                                   | 0.007773            |
| GABA A and B receptor activation                                                    | 0.008237            |
| Calcium signaling pathway                                                           | 0.01122             |
| Plexin D1 signaling                                                                 | 0.01459             |
| Neurophilin interactions with VEGF and VEGF receptor                                | 0.01816             |
| GABA (A) receptor activation                                                        | 0.02052             |
| Opening of calcium channels triggered by depolarization of the presynaptic terminal | 0.02052             |
| Other semaphorin interactions                                                       | 0.02052             |
| Cells and molecules involved in local acute inflammatory response                   | 0.02794             |
| Unblocking of NMDA receptor, glutamate binding and activation                       | 0.02794             |
| Activation of NMDA receptor upon glutamate binding and postsynaptic events          | 0.02794             |
| cAMP cell motility pathway inferred from amoeba model                               | 0.0307              |
| Interleukin-6 regulation of target genes                                            | 0.04795             |
| Long-term depression                                                                | 0.04795             |
|                                                                                     |                     |

| <b>KEGG 2021 Human</b>                                                 | <b>adj. P-value</b> |
|------------------------------------------------------------------------|---------------------|
| ECM-receptor interaction                                               | 3.76E-09            |
| ABC transporters                                                       | 1.04E-08            |
| Arrhythmogenic right ventricular cardiomyopathy                        | 5.02E-07            |
| Protein digestion and absorption                                       | 0.000001842         |
| Circadian entrainment                                                  | 0.000004844         |
| Dilated cardiomyopathy                                                 | 0.00001193          |
| Hypertrophic cardiomyopathy                                            | 0.0001191           |
| PI3K-Akt signaling pathway                                             | 0.0004359           |
| Focal adhesion                                                         | 0.0005138           |
| Long-term depression                                                   | 0.002048            |
| Glutamatergic synapse                                                  | 0.002048            |
| cGMP-PKG signaling pathway                                             | 0.002048            |
| Calcium signaling pathway                                              | 0.002618            |
| Oxytocin signaling pathway                                             | 0.004372            |
| Morphine addiction                                                     | 0.006175            |
| Nicotine addiction                                                     | 0.009043            |
| Phospholipase D signaling pathway                                      | 0.009043            |
| GABAergic synapse                                                      | 0.01016             |
| Adrenergic signaling in cardiomyocytes                                 | 0.01016             |
| Rap1 signaling pathway                                                 | 0.0124              |
| Aldosterone synthesis and secretion                                    | 0.01254             |
| Salivary secretion                                                     | 0.01432             |
| Cholinergic synapse                                                    | 0.01432             |
| Mannose type O-glycan biosynthesis                                     | 0.01695             |
| Renin secretion                                                        | 0.01695             |
| cAMP signaling pathway                                                 | 0.01695             |
| Axon guidance                                                          | 0.02051             |
| Vitamin digestion and absorption                                       | 0.0215              |
| Cortisol synthesis and secretion                                       | 0.02192             |
| Other types of O-glycan biosynthesis                                   | 0.02268             |
| Retrograde endocannabinoid signaling                                   | 0.02268             |
| Insulin secretion                                                      | 0.02441             |
| Glycerolipid metabolism                                                | 0.02815             |
| Apelin signaling pathway                                               | 0.02919             |
| Phosphatidylinositol signaling system                                  | 0.03763             |
| Cell adhesion molecules                                                | 0.03926             |
| Inflammatory mediator regulation of TRP channels                       | 0.03998             |
|                                                                        |                     |
|                                                                        |                     |
| <b>Reactome 2016</b>                                                   | <b>adj. P-value</b> |
| Extracellular matrix organization Homo sapiens R-HSA-1474244           | 2.64E-12            |
| Interaction between L1 and Ankyrins Homo sapiens R-HSA-445095          | 8.44E-09            |
| Collagen biosynthesis and modifying enzymes Homo sapiens R-HSA-1650814 | 8.44E-09            |
| L1CAM interactions Homo sapiens R-HSA-373760                           | 1.04E-08            |
| Axon guidance Homo sapiens R-HSA-422475                                | 3.08E-07            |
| Collagen formation Homo sapiens R-HSA-1474290                          | 5.06E-07            |
| Transmembrane transport of small molecules Homo sapiens R-HSA-382551   | 9.25E-07            |
| NCAM1 interactions Homo sapiens R-HSA-419037                           | 0.000004117         |
| Neuronal System Homo sapiens R-HSA-112316                              | 0.000004117         |
| Transmission across Chemical Synapses Homo sapiens R-HSA-112315        | 0.000004204         |
| ABC-family proteins mediated transport Homo sapiens R-HSA-382556       | 0.00001743          |
| Ion channel transport Homo sapiens R-HSA-983712                        | 0.00001941          |

|                                                                                            |                     |
|--------------------------------------------------------------------------------------------|---------------------|
| O-linked glycosylation Homo sapiens R-HSA-5173105                                          | 0.00003716          |
| Effects of PIP2 hydrolysis Homo sapiens R-HSA-114508                                       | 0.00005059          |
| Phase 0 - rapid depolarisation Homo sapiens R-HSA-5576892                                  | 0.00005059          |
| Muscle contraction Homo sapiens R-HSA-397014                                               | 0.00008966          |
| Diseases associated with O-glycosylation of proteins Homo sapiens R-HSA-3906995            | 0.0001286           |
| Integrin cell surface interactions Homo sapiens R-HSA-216083                               | 0.0001286           |
| ECM proteoglycans Homo sapiens R-HSA-3000178                                               | 0.000279            |
| Ion transport by P-type ATPases Homo sapiens R-HSA-936837                                  | 0.000279            |
| Cardiac conduction Homo sapiens R-HSA-5576891                                              | 0.000279            |
| Nitric oxide stimulates guanylate cyclase Homo sapiens R-HSA-392154                        | 0.0007398           |
| Neurotransmitter Receptor Binding And Downstream Transmission In The Postsynaptic Cell     | 0.0007526           |
| Assembly of collagen fibrils and other multimeric structures Homo sapiens R-HSA-2022090    | 0.0007763           |
| Developmental Biology Homo sapiens R-HSA-1266738                                           | 0.0007763           |
| Diseases of glycosylation Homo sapiens R-HSA-3781865                                       | 0.0008384           |
| Laminin interactions Homo sapiens R-HSA-3000157                                            | 0.001679            |
| Defective B3GALT1 causes Peters-plus syndrome (PpS) Homo sapiens R-HSA-5083635             | 0.001786            |
| O-glycosylation of TSR domain-containing proteins Homo sapiens R-HSA-5173214               | 0.002374            |
| Phase 2 - plateau phase Homo sapiens R-HSA-5576893                                         | 0.005246            |
| Degradation of the extracellular matrix Homo sapiens R-HSA-1474228                         | 0.005621            |
| Hemostasis Homo sapiens R-HSA-109582                                                       | 0.005974            |
| cGMP effects Homo sapiens R-HSA-418457                                                     | 0.006798            |
| Other semaphorin interactions Homo sapiens R-HSA-416700                                    | 0.01007             |
| GABA receptor activation Homo sapiens R-HSA-977443                                         | 0.01007             |
| Collagen degradation Homo sapiens R-HSA-1442490                                            | 0.01125             |
| Platelet homeostasis Homo sapiens R-HSA-418346                                             | 0.01292             |
| Non-integrin membrane-ECM interactions Homo sapiens R-HSA-3000171                          | 0.02248             |
| Unblocking of NMDA receptor, glutamate binding and activation Homo sapiens R-HSA-438066    | 0.02524             |
| Depolarization of the Presynaptic Terminal Triggers the Opening of Calcium Channels        | 0.02704             |
| GABA A receptor activation Homo sapiens R-HSA-977441                                       | 0.02704             |
| Phase 1 - inactivation of fast Na <sup>+</sup> channels Homo sapiens R-HSA-5576894         | 0.02704             |
| Activation of NMDA receptor upon glutamate binding and postsynaptic events                 | 0.03646             |
| NCAM signaling for neurite out-growth Homo sapiens R-HSA-375165                            | 0.04807             |
|                                                                                            |                     |
|                                                                                            |                     |
| <b>WikiPathway 2021 Human</b>                                                              | <b>adj. P-value</b> |
| Arrhythmogenic Right Ventricular Cardiomyopathy WP2118                                     | 0.000004711         |
| Splicing factor NOVA regulated synaptic proteins WP4148                                    | 0.00001292          |
| Phosphodiesterases in neuronal function WP4222                                             | 0.0003876           |
| Focal Adhesion-PI3K-Akt-mTOR-signaling pathway WP3932                                      | 0.0003876           |
| PI3K-Akt signaling pathway WP4172                                                          | 0.002477            |
| Focal Adhesion WP306                                                                       | 0.004761            |
| miRNA targets in ECM and membrane receptors WP2911                                         | 0.01338             |
| Primary focal segmental glomerulosclerosis (FSGS) WP2572                                   | 0.01838             |
| Fragile X Syndrome WP4549                                                                  | 0.03064             |
| Alzheimer's disease WP2059                                                                 | 0.03343             |
| Cell-type Dependent Selectivity of CCK2R Signaling WP3679                                  | 0.04197             |
| Cells and molecules involved in local acute inflammatory response WP4493                   | 0.04197             |
| PKC-gamma calcium signaling pathway in ataxia WP4760                                       | 0.04197             |
|                                                                                            |                     |
|                                                                                            |                     |
| <b>NCI-Nature 2016</b>                                                                     | <b>adj. P-value</b> |
| Beta1 integrin cell surface interactions Homo sapiens 2fd0bc63-618d-11e5-8ac5-06603eb7f303 | 0.000003052         |
| Syndecan-1-mediated signaling events Homo sapiens f957cc16-6195-11e5-8ac5-06603eb7f303     | 0.0001446           |
| Integrins in angiogenesis Homo sapiens 2ddeac89-6194-11e5-8ac5-06603eb7f303                | 0.0004829           |

|                                                                                            |                     |
|--------------------------------------------------------------------------------------------|---------------------|
| Beta3 integrin cell surface interactions Homo sapiens c2800165-618d-11e5-8ac5-06603eb7f303 | 0.003116            |
| Plexin-D1 Signaling Homo sapiens e3068f36-6194-11e5-8ac5-06603eb7f303                      | 0.0155              |
|                                                                                            |                     |
|                                                                                            |                     |
| <b>MSigDB Hallmark 2020</b>                                                                | <b>adj. P-value</b> |
| Epithelial Mesenchymal Transition                                                          | 9.03E-07            |
| UV Response Dn                                                                             | 0.01206             |
| Myogenesis                                                                                 | 0.01206             |
|                                                                                            |                     |
|                                                                                            |                     |
| <b>Elsevier Pathway Collection</b>                                                         | <b>adj. P-value</b> |
| Proteins Involved in Epilepsy                                                              | 9.74E-11            |
| Inherited Channelopathies                                                                  | 0.004141            |
| Postsynaptic Neuron Activation                                                             | 0.004378            |
| Cochlear Hair Cell Stereocilia Proteins Mutations (Age-Related)                            | 0.005433            |
| Proteins Involved in Tangier Disease                                                       | 0.008267            |
| nNOS (NOS1) and iNOS (NOS2) Activation via Glutamate                                       | 0.01508             |
| Proteins Involved in Hearing Loss                                                          | 0.01883             |
|                                                                                            |                     |
|                                                                                            |                     |
| <b>Panther 2016</b>                                                                        | <b>adj. P-value</b> |
| Integrin signalling pathway Homo sapiens P00034                                            | 0.00009407          |
| Metabotropic glutamate receptor group III pathway Homo sapiens P00039                      | 0.003325            |
| Beta2 adrenergic receptor signaling pathway Homo sapiens P04378                            | 0.007017            |
| Beta1 adrenergic receptor signaling pathway Homo sapiens P04377                            | 0.007017            |
| Nicotinic acetylcholine receptor signaling pathway Homo sapiens P00044                     | 0.007791            |
| Oxytocin receptor mediated signaling pathway Homo sapiens P04391                           | 0.01716             |
| Alzheimer disease-amyloid secretase pathway Homo sapiens P00003                            | 0.01716             |
| Endothelin signaling pathway Homo sapiens P00019                                           | 0.01716             |
| Histamine H1 receptor mediated signaling pathway Homo sapiens P04385                       | 0.03671             |
| Ionotropic glutamate receptor pathway Homo sapiens P00037                                  | 0.04667             |

**Supplementary Table S7. Enrichment Pathway analysis of down-regulated genes.**

| GO BP                                                                            | adj. P-value |
|----------------------------------------------------------------------------------|--------------|
| SRP-dependent cotranslational protein targeting to membrane (GO:0006614)         | 7.68E-74     |
| cytoplasmic translation (GO:0002181)                                             | 1.73E-72     |
| cotranslational protein targeting to membrane (GO:0006613)                       | 3.89E-72     |
| protein targeting to ER (GO:0045047)                                             | 5.75E-68     |
| nuclear-transcribed mRNA catabolic process, nonsense-mediated decay (GO:0000184) | 5.01E-64     |
| peptide biosynthetic process (GO:0043043)                                        | 8.74E-60     |
| translation (GO:0006412)                                                         | 2.85E-55     |
| nuclear-transcribed mRNA catabolic process (GO:0000956)                          | 9.15E-54     |
| cellular macromolecule biosynthetic process (GO:0034645)                         | 1.36E-53     |
| gene expression (GO:0010467)                                                     | 1.53E-42     |
| rRNA processing (GO:0006364)                                                     | 2.54E-36     |
| rRNA metabolic process (GO:0016072)                                              | 7.94E-36     |
| ribosome biogenesis (GO:0042254)                                                 | 1.12E-34     |
| cellular protein metabolic process (GO:0044267)                                  | 1.53E-33     |
| ncRNA processing (GO:0034470)                                                    | 2.08E-31     |
| ribosome assembly (GO:0042255)                                                   | 1.79E-10     |
| protein-DNA complex assembly (GO:0065004)                                        | 3.35E-10     |
| nucleosome organization (GO:0034728)                                             | 3.88E-10     |
| chromatin assembly (GO:0031497)                                                  | 1.51E-09     |
| ribosomal large subunit biogenesis (GO:0042273)                                  | 1.59E-09     |
| nucleosome assembly (GO:0006334)                                                 | 2.07E-09     |
| ribosomal small subunit biogenesis (GO:0042274)                                  | 8.36E-09     |
| ribonucleoprotein complex biogenesis (GO:0022613)                                | 3.44E-07     |
| ribonucleoprotein complex assembly (GO:0022618)                                  | 5.49E-07     |
| aerobic electron transport chain (GO:0019646)                                    | 0.000003051  |
| mitochondrial ATP synthesis coupled electron transport (GO:0042775)              | 0.000003594  |
| mitochondrial respiratory chain complex I assembly (GO:0032981)                  | 0.000013     |
| NADH dehydrogenase complex assembly (GO:0010257)                                 | 0.000013     |
| translational elongation (GO:0006414)                                            | 0.00002143   |
| aerobic respiration (GO:0009060)                                                 | 0.00003741   |
| mitochondrion organization (GO:0007005)                                          | 0.00004293   |
| mitochondrial transport (GO:0006839)                                             | 0.00005794   |
| ribosomal small subunit assembly (GO:0000028)                                    | 0.00009884   |
| ribosomal large subunit assembly (GO:0000027)                                    | 0.0001539    |
| cellular response to oxidative stress (GO:0034599)                               | 0.0002514    |
| regulation of gene silencing by RNA (GO:0060966)                                 | 0.000299     |
| regulation of posttranscriptional gene silencing (GO:0060147)                    | 0.000299     |
| mitochondrial respiratory chain complex assembly (GO:0033108)                    | 0.0003433    |
| regulation of gene silencing by miRNA (GO:0060964)                               | 0.0003524    |
| establishment of protein localization to mitochondrion (GO:0072655)              | 0.0005141    |
| regulation of DNA recombination at telomere (GO:0072695)                         | 0.0005725    |
| negative regulation of DNA recombination at telomere (GO:0048239)                | 0.0005725    |
| regulation of translation (GO:0006417)                                           | 0.0005725    |
| cellular respiration (GO:0045333)                                                | 0.001046     |
| mitochondrial translational elongation (GO:0070125)                              | 0.001235     |
| mitochondrial translational termination (GO:0070126)                             | 0.001235     |
| positive regulation of viral transcription (GO:0050434)                          | 0.001685     |
| mitochondrial translation (GO:0032543)                                           | 0.001685     |

|                                                                                                   |          |
|---------------------------------------------------------------------------------------------------|----------|
| RNA metabolic process (GO:0016070)                                                                | 0.001685 |
| translational termination (GO:0006415)                                                            | 0.002576 |
| nucleic acid metabolic process (GO:0090304)                                                       | 0.002719 |
| RNA splicing, via transesterification reactions with bulged adenosine as nucleophile (GO:0000377) | 0.002909 |
| inner mitochondrial membrane organization (GO:0007007)                                            | 0.003178 |
| pentose-phosphate shunt (GO:0006098)                                                              | 0.00322  |
| hydrogen peroxide metabolic process (GO:0042743)                                                  | 0.00322  |
| transcription-coupled nucleotide-excision repair (GO:0006283)                                     | 0.00322  |
| mitochondrial electron transport, NADH to ubiquinone (GO:0006120)                                 | 0.00331  |
| hydrogen peroxide catabolic process (GO:0042744)                                                  | 0.003584 |
| DNA-dependent DNA replication (GO:0006261)                                                        | 0.003584 |
| mRNA splicing, via spliceosome (GO:0000398)                                                       | 0.003584 |
| cellular response to chemical stress (GO:0062197)                                                 | 0.003607 |
| fibroblast growth factor receptor signaling pathway (GO:0008543)                                  | 0.003745 |
| positive regulation of viral process (GO:0048524)                                                 | 0.003879 |
| gluconeogenesis (GO:0006094)                                                                      | 0.004224 |
| regulation of viral transcription (GO:0046782)                                                    | 0.004224 |
| positive regulation of signal transduction by p53 class mediator (GO:1901798)                     | 0.004326 |
| regulation of apoptotic process (GO:0042981)                                                      | 0.004467 |
| nucleotide-excision repair (GO:0006289)                                                           | 0.004839 |
| 7-methylguanosine mRNA capping (GO:0006370)                                                       | 0.00498  |
| 7-methylguanosine RNA capping (GO:0009452)                                                        | 0.00498  |
| glucose 6-phosphate metabolic process (GO:0051156)                                                | 0.005272 |
| negative regulation of ubiquitin-protein transferase activity (GO:0051444)                        | 0.005322 |
| protein targeting to mitochondrion (GO:0006626)                                                   | 0.005866 |
| hexose biosynthetic process (GO:0019319)                                                          | 0.006244 |
| negative regulation of ubiquitin protein ligase activity (GO:1904667)                             | 0.006871 |
| DNA unwinding involved in DNA replication (GO:0006268)                                            | 0.00693  |
| nuclear transport (GO:0051169)                                                                    | 0.00693  |
| nucleotide catabolic process (GO:0009166)                                                         | 0.00693  |
| negative regulation of DNA recombination (GO:0045910)                                             | 0.007184 |
| mitochondrial ATP synthesis coupled proton transport (GO:0042776)                                 | 0.009283 |
| maturation of LSU-rRNA (GO:0000470)                                                               | 0.009361 |
| TOR signaling (GO:0031929)                                                                        | 0.009361 |
| negative regulation of proteolysis involved in cellular protein catabolic process (GO:1903051)    | 0.009361 |
| modulation by symbiont of host process (GO:0044003)                                               | 0.009927 |
| negative regulation of ubiquitin-dependent protein catabolic process (GO:2000059)                 | 0.01264  |
| glucose metabolic process (GO:0006006)                                                            | 0.01264  |
| cristae formation (GO:0042407)                                                                    | 0.01357  |
| negative regulation of oxidative stress-induced cell death (GO:1903202)                           | 0.01357  |
| negative regulation of hydrogen peroxide-induced neuron death (GO:1903208)                        | 0.0136   |
| positive regulation of dendritic cell differentiation (GO:2001200)                                | 0.0136   |
| rDNA heterochromatin assembly (GO:0000183)                                                        | 0.01398  |
| ATP synthesis coupled proton transport (GO:0015986)                                               | 0.01423  |
| DNA duplex unwinding (GO:0032508)                                                                 | 0.01423  |
| pre-replicative complex assembly (GO:0036388)                                                     | 0.0147   |
| glycolytic process (GO:0006096)                                                                   | 0.0152   |
| cellular response to fibroblast growth factor stimulus (GO:0044344)                               | 0.0152   |
| carbohydrate catabolic process (GO:0016052)                                                       | 0.01801  |
| mitochondrial electron transport, ubiquinol to cytochrome c (GO:0006122)                          | 0.01891  |
| transcription elongation from RNA polymerase II promoter (GO:0006368)                             | 0.01965  |
| regulation of ubiquitin-dependent protein catabolic process (GO:2000058)                          | 0.01991  |
| nucleic acid-templated transcription (GO:0097659)                                                 | 0.01991  |
| mRNA processing (GO:0006397)                                                                      | 0.01991  |

|                                                                                      |                     |
|--------------------------------------------------------------------------------------|---------------------|
| regulation of translational initiation (GO:0006446)                                  | 0.02107             |
| pyruvate metabolic process (GO:0006090)                                              | 0.02139             |
| DNA-templated transcription, elongation (GO:0006354)                                 | 0.02301             |
| negative regulation of programmed cell death (GO:0043069)                            | 0.02318             |
| negative regulation of hydrogen peroxide-induced cell death (GO:1903206)             | 0.02429             |
| regulation of mRNA stability (GO:0043488)                                            | 0.02432             |
| positive regulation of gene expression, epigenetic (GO:0045815)                      | 0.02597             |
| negative regulation of apoptotic process (GO:0043066)                                | 0.02635             |
| positive regulation of translation (GO:0045727)                                      | 0.02639             |
| postreplication repair (GO:0006301)                                                  | 0.03124             |
| response to reactive oxygen species (GO:0000302)                                     | 0.03124             |
| selective autophagy (GO:0061912)                                                     | 0.03124             |
| macropinocytosis (GO:0044351)                                                        | 0.03462             |
| canonical glycolysis (GO:0061621)                                                    | 0.03462             |
| glucose catabolic process to pyruvate (GO:0061718)                                   | 0.03462             |
| heterochromatin assembly (GO:0031507)                                                | 0.03462             |
| protein insertion into mitochondrial membrane (GO:0051204)                           | 0.03462             |
| negative regulation of protein kinase activity (GO:0006469)                          | 0.03748             |
| nitric oxide biosynthetic process (GO:0006809)                                       | 0.03867             |
| regulation of mRNA catabolic process (GO:0061013)                                    | 0.03879             |
| platelet aggregation (GO:0070527)                                                    | 0.0391              |
| glycolytic process through glucose-6-phosphate (GO:0061620)                          | 0.04029             |
| amyloid fibril formation (GO:1990000)                                                | 0.04342             |
| cellular response to reactive oxygen species (GO:0034614)                            | 0.04342             |
| protein targeting (GO:0006605)                                                       | 0.04578             |
| regulation of chromatin silencing (GO:0031935)                                       | 0.04625             |
| nitric oxide metabolic process (GO:0046209)                                          | 0.04625             |
| antimicrobial humoral immune response mediated by antimicrobial peptide (GO:0061844) | 0.04625             |
| negative regulation of intrinsic apoptotic signaling pathway (GO:2001243)            | 0.04625             |
| regulation of endodeoxyribonuclease activity (GO:0032071)                            | 0.04707             |
| negative regulation of response to reactive oxygen species (GO:1901032)              | 0.04707             |
| positive regulation of leukocyte differentiation (GO:1902107)                        | 0.04707             |
| DNA replication initiation (GO:0006270)                                              | 0.04744             |
|                                                                                      |                     |
|                                                                                      |                     |
| <b>GO MF</b>                                                                         | <b>adj. P-value</b> |
| RNA binding (GO:0003723)                                                             | 8.45E-34            |
| cadherin binding (GO:0045296)                                                        | 6.04E-08            |
| ubiquitin ligase inhibitor activity (GO:1990948)                                     | 1.10E-07            |
| ubiquitin-protein transferase inhibitor activity (GO:0055105)                        | 3.61E-07            |
| rRNA binding (GO:0019843)                                                            | 0.00002258          |
| oxidoreduction-driven active transmembrane transporter activity (GO:0015453)         | 0.00008511          |
| large ribosomal subunit rRNA binding (GO:0070180)                                    | 0.0006068           |
| mRNA 5'-UTR binding (GO:0048027)                                                     | 0.001437            |
| DNA binding (GO:0003677)                                                             | 0.004017            |
| NADH dehydrogenase (quinone) activity (GO:0050136)                                   | 0.01061             |
| NADH dehydrogenase (ubiquinone) activity (GO:0008137)                                | 0.01061             |
| mRNA binding (GO:0003729)                                                            | 0.01235             |
| 5'-3' RNA polymerase activity (GO:0034062)                                           | 0.01923             |
| DNA-directed 5'-3' RNA polymerase activity (GO:0003899)                              | 0.01923             |
| translation initiation factor activity (GO:0003743)                                  | 0.02149             |
| ubiquinol-cytochrome-c reductase activity (GO:0008121)                               | 0.02584             |
| single-stranded DNA binding (GO:0003697)                                             | 0.02584             |
| damaged DNA binding (GO:0003684)                                                     | 0.02774             |



|                                                                                            |                     |
|--------------------------------------------------------------------------------------------|---------------------|
| translation elongation factor activity (GO:0003746)                                        | 0.03431             |
| muscle alpha-actinin binding (GO:0051371)                                                  | 0.04316             |
| ubiquitin protein ligase binding (GO:0031625)                                              | 0.0457              |
|                                                                                            |                     |
|                                                                                            |                     |
| <b>GO CC</b>                                                                               | <b>adj. P-value</b> |
| large ribosomal subunit (GO:0015934)                                                       | 4.68E-43            |
| cytosolic large ribosomal subunit (GO:0022625)                                             | 9.45E-42            |
| ribosome (GO:0005840)                                                                      | 2.68E-32            |
| small ribosomal subunit (GO:0015935)                                                       | 6.90E-31            |
| cytosolic small ribosomal subunit (GO:0022627)                                             | 7.91E-30            |
| polysomal ribosome (GO:0042788)                                                            | 2.57E-22            |
| focal adhesion (GO:0005925)                                                                | 3.86E-19            |
| cell-substrate junction (GO:0030055)                                                       | 8.33E-19            |
| mitochondrial membrane (GO:0031966)                                                        | 3.51E-15            |
| nucleus (GO:0005634)                                                                       | 4.86E-12            |
| mitochondrial inner membrane (GO:0005743)                                                  | 1.08E-11            |
| organelle inner membrane (GO:0019866)                                                      | 1.53E-11            |
| intracellular membrane-bounded organelle (GO:0043231)                                      | 8.36E-10            |
| intracellular non-membrane-bounded organelle (GO:0043232)                                  | 7.13E-08            |
| cytoplasmic vesicle lumen (GO:0060205)                                                     | 6.69E-07            |
| nuclear lumen (GO:0031981)                                                                 | 0.00001237          |
| nucleolus (GO:0005730)                                                                     | 0.0000157           |
| mitochondrial outer membrane (GO:0005741)                                                  | 0.00005341          |
| mitochondrial proton-transporting ATP synthase complex, catalytic sector F(1) (GO:0000275) | 0.0001168           |
| RNA polymerase II, core complex (GO:0005665)                                               | 0.0001168           |
| ficolin-1-rich granule lumen (GO:1904813)                                                  | 0.0001374           |
| cytoskeleton (GO:0005856)                                                                  | 0.0001374           |
| organelle outer membrane (GO:0031968)                                                      | 0.0002107           |
| rough endoplasmic reticulum membrane (GO:0030867)                                          | 0.0002733           |
| secretory granule lumen (GO:0034774)                                                       | 0.0004765           |
| mitochondrial matrix (GO:0005759)                                                          | 0.0009539           |
| mitochondrial respiratory chain complex I (GO:0005747)                                     | 0.001147            |
| respiratory chain complex I (GO:0045271)                                                   | 0.001147            |
| proton-transporting ATP synthase complex (GO:0045259)                                      | 0.001292            |
| ficolin-1-rich granule (GO:0101002)                                                        | 0.001357            |
| mitochondrial proton-transporting ATP synthase complex (GO:0005753)                        | 0.003147            |
| postsynaptic density (GO:0014069)                                                          | 0.004591            |
| cytoplasmic side of endoplasmic reticulum membrane (GO:0098554)                            | 0.007704            |
| asymmetric synapse (GO:0032279)                                                            | 0.009474            |
| spliceosomal snRNP complex (GO:0097525)                                                    | 0.0183              |
| mitochondrial respiratory chain complex III (GO:0005750)                                   | 0.02501             |
| U2-type spliceosomal complex (GO:0005684)                                                  | 0.03747             |
| mitochondrial outer membrane translocase complex (GO:0005742)                              | 0.0443              |
| polymeric cytoskeletal fiber (GO:0099513)                                                  | 0.0443              |
|                                                                                            |                     |
|                                                                                            |                     |
| <b>Panther 2016</b>                                                                        | <b>adj. P-value</b> |
| Glycolysis Homo sapiens P00024                                                             | 0.02279             |
| Cytoskeletal regulation by Rho GTPase Homo sapiens P00016                                  | 0.04118             |
|                                                                                            |                     |
|                                                                                            |                     |
| <b>HumanCyc 2016</b>                                                                       | <b>adj. P-value</b> |
| gluconeogenesis Homo sapiens PWY66-399                                                     | 0.001102            |

|                                                                                                                                 |                     |
|---------------------------------------------------------------------------------------------------------------------------------|---------------------|
| pentose phosphate pathway Homo sapiens PENTOSE-P-PWY                                                                            | 0.001806            |
| superpathway of conversion of glucose to acetyl CoA and entry into the TCA cycle Homo sapiens PWY66-407                         | 0.005055            |
| glutathione redox reactions I Homo sapiens PWY-4081                                                                             | 0.01416             |
| glycolysis Homo sapiens PWY66-400                                                                                               | 0.0196              |
|                                                                                                                                 |                     |
|                                                                                                                                 |                     |
| <b>Reactome 2016</b>                                                                                                            | <b>adj. P-value</b> |
| Eukaryotic Translation Elongation Homo sapiens R-HSA-156842                                                                     | 8.32E-81            |
| Peptide chain elongation Homo sapiens R-HSA-156902                                                                              | 2.31E-80            |
| Viral mRNA Translation Homo sapiens R-HSA-192823                                                                                | 1.90E-76            |
| L13a-mediated translational silencing of Ceruloplasmin expression Homo sapiens R-HSA-156827                                     | 6.10E-76            |
| 3' -UTR-mediated translational regulation Homo sapiens R-HSA-157279                                                             | 6.10E-76            |
| Cap-dependent Translation Initiation Homo sapiens R-HSA-72737                                                                   | 6.10E-76            |
| Eukaryotic Translation Initiation Homo sapiens R-HSA-72613                                                                      | 6.10E-76            |
| Nonsense Mediated Decay (NMD) independent of the Exon Junction Complex (EJC) Homo sapiens R-HSA-975956                          | 8.88E-76            |
| Formation of a pool of free 40S subunits Homo sapiens R-HSA-72689                                                               | 9.34E-76            |
| GTP hydrolysis and joining of the 60S ribosomal subunit Homo sapiens R-HSA-72706                                                | 9.34E-76            |
| Selenocysteine synthesis Homo sapiens R-HSA-2408557                                                                             | 3.43E-75            |
| Eukaryotic Translation Termination Homo sapiens R-HSA-72764                                                                     | 3.43E-75            |
| Translation Homo sapiens R-HSA-72766                                                                                            | 7.65E-71            |
| Influenza Viral RNA Transcription and Replication Homo sapiens R-HSA-168273                                                     | 4.01E-69            |
| Nonsense-Mediated Decay (NMD) Homo sapiens R-HSA-927802                                                                         | 9.61E-68            |
| Nonsense Mediated Decay (NMD) enhanced by the Exon Junction Complex (EJC) Homo sapiens R-HSA-975957                             | 9.61E-68            |
| SRP-dependent cotranslational protein targeting to membrane Homo sapiens R-HSA-1799339                                          | 2.34E-67            |
| Influenza Life Cycle Homo sapiens R-HSA-168255                                                                                  | 1.45E-66            |
| Influenza Infection Homo sapiens R-HSA-168254                                                                                   | 3.11E-66            |
| Selenoamino acid metabolism Homo sapiens R-HSA-2408522                                                                          | 7.68E-66            |
| Major pathway of rRNA processing in the nucleolus Homo sapiens R-HSA-6791226                                                    | 4.19E-53            |
| rRNA processing Homo sapiens R-HSA-72312                                                                                        | 3.04E-50            |
| Infectious disease Homo sapiens R-HSA-5663205                                                                                   | 3.60E-48            |
| Metabolism of amino acids and derivatives Homo sapiens R-HSA-71291                                                              | 9.54E-41            |
| Activation of the mRNA upon binding of the cap-binding complex and eIFs, and subsequent binding to 43S Homo sapiens R-HSA-72662 | 6.22E-31            |
| Translation initiation complex formation Homo sapiens R-HSA-72649                                                               | 9.65E-30            |
| Formation of the ternary complex, and subsequently, the 43S complex Homo sapiens R-HSA-72695                                    | 4.20E-29            |
| Ribosomal scanning and start codon recognition Homo sapiens R-HSA-72702                                                         | 3.02E-28            |
| Disease Homo sapiens R-HSA-1643685                                                                                              | 7.47E-27            |
| Metabolism Homo sapiens R-HSA-1430728                                                                                           | 1.52E-22            |
| Metabolism of proteins Homo sapiens R-HSA-392499                                                                                | 1.73E-21            |
| Gene Expression Homo sapiens R-HSA-74160                                                                                        | 2.56E-17            |
| Respiratory electron transport Homo sapiens R-HSA-611105                                                                        | 5.10E-07            |
| The citric acid (TCA) cycle and respiratory electron transport Homo sapiens R-HSA-1428517                                       | 0.00000124          |
| Respiratory electron transport, ATP synthesis by chemiosmotic coupling, and heat production by uncoupling proteins.             | 0.000002351         |
| Detoxification of Reactive Oxygen Species Homo sapiens R-HSA-3299685                                                            | 0.000004666         |
| FGFR2 alternative splicing Homo sapiens R-HSA-6803529                                                                           | 0.00006925          |
| Signaling by FGFR2 IIIa TM Homo sapiens R-HSA-8851708                                                                           | 0.00007302          |
| Pentose phosphate pathway (hexose monophosphate shunt) Homo sapiens R-HSA-71336                                                 | 0.0001736           |
| HIV Infection Homo sapiens R-HSA-162906                                                                                         | 0.0001858           |
| Complex I biogenesis Homo sapiens R-HSA-6799198                                                                                 | 0.0002111           |
| Nucleotide Excision Repair Homo sapiens R-HSA-5696398                                                                           | 0.0002111           |
| TP53 Regulates Metabolic Genes Homo sapiens R-HSA-5628897                                                                       | 0.0002438           |
| MicroRNA (miRNA) biogenesis Homo sapiens R-HSA-203927                                                                           | 0.0002637           |
| Abortive elongation of HIV-1 transcript in the absence of Tat Homo sapiens R-HSA-167242                                         | 0.0002637           |

|                                                                                      |           |
|--------------------------------------------------------------------------------------|-----------|
| Gluconeogenesis Homo sapiens R-HSA-70263                                             | 0.0003084 |
| mRNA Splicing - Minor Pathway Homo sapiens R-HSA-72165                               | 0.0003227 |
| Metabolism of nucleotides Homo sapiens R-HSA-15869                                   | 0.0003227 |
| Transcriptional Regulation by TP53 Homo sapiens R-HSA-3700989                        | 0.0007296 |
| RNA Pol II CTD phosphorylation and interaction with CE Homo sapiens R-HSA-167160     | 0.0007413 |
| RNA Pol II CTD phosphorylation and interaction with CE Homo sapiens R-HSA-77075      | 0.0007413 |
| Mitochondrial translation initiation Homo sapiens R-HSA-5368286                      | 0.0009854 |
| mRNA Capping Homo sapiens R-HSA-72086                                                | 0.001176  |
| Dual incision in TC-NER Homo sapiens R-HSA-6782135                                   | 0.001585  |
| Transcription-Coupled Nucleotide Excision Repair (TC-NER) Homo sapiens R-HSA-6781827 | 0.001672  |
| Pink/Parkin Mediated Mitophagy Homo sapiens R-HSA-5205685                            | 0.001693  |
| Mitophagy Homo sapiens R-HSA-5205647                                                 | 0.001693  |
| Pausing and recovery of Tat-mediated HIV elongation Homo sapiens R-HSA-167238        | 0.001693  |
| Tat-mediated HIV elongation arrest and recovery Homo sapiens R-HSA-167243            | 0.001693  |
| Mitochondrial translation Homo sapiens R-HSA-5368287                                 | 0.001693  |
| Formation of TC-NER Pre-Incision Complex Homo sapiens R-HSA-6781823                  | 0.00183   |
| mRNA Splicing - Major Pathway Homo sapiens R-HSA-72163                               | 0.001847  |
| HIV elongation arrest and recovery Homo sapiens R-HSA-167287                         | 0.001878  |
| Pausing and recovery of HIV elongation Homo sapiens R-HSA-167290                     | 0.001878  |
| Elongation arrest and recovery Homo sapiens R-HSA-112387                             | 0.001878  |
| Mitotic G1-G1/S phases Homo sapiens R-HSA-453279                                     | 0.00205   |
| Formation of the Early Elongation Complex Homo sapiens R-HSA-113418                  | 0.002175  |
| Formation of the HIV-1 Early Elongation Complex Homo sapiens R-HSA-167158            | 0.002175  |
| FGFR2 mutant receptor activation Homo sapiens R-HSA-1839126                          | 0.002175  |
| S Phase Homo sapiens R-HSA-69242                                                     | 0.002486  |
| Synthesis of DNA Homo sapiens R-HSA-69239                                            | 0.002947  |
| G1/S Transition Homo sapiens R-HSA-69206                                             | 0.003079  |
| Mitochondrial translation termination Homo sapiens R-HSA-5419276                     | 0.003089  |
| Mitochondrial translation elongation Homo sapiens R-HSA-5389840                      | 0.003089  |
| mRNA Splicing Homo sapiens R-HSA-72172                                               | 0.003397  |
| RHO GTPases Activate WASPs and WAVes Homo sapiens R-HSA-5663213                      | 0.00346   |
| Host Interactions of HIV factors Homo sapiens R-HSA-162909                           | 0.00346   |
| Sema4D in semaphorin signaling Homo sapiens R-HSA-400685                             | 0.004347  |
| Gap-filling DNA repair synthesis and ligation in TC-NER Homo sapiens R-HSA-6782210   | 0.004818  |
| Ubiquitin-dependent degradation of Cyclin D1 Homo sapiens R-HSA-69229                | 0.004984  |
| Ubiquitin-dependent degradation of Cyclin D Homo sapiens R-HSA-75815                 | 0.004984  |
| APOBEC3G mediated resistance to HIV-1 infection Homo sapiens R-HSA-180689            | 0.005227  |
| DNA Replication Homo sapiens R-HSA-69306                                             | 0.005284  |
| PIWI-interacting RNA (piRNA) biogenesis Homo sapiens R-HSA-5601884                   | 0.006084  |
| Glucose metabolism Homo sapiens R-HSA-70326                                          | 0.006696  |
| HIV Life Cycle Homo sapiens R-HSA-162587                                             | 0.007585  |
| AUF1 (hnRNP D0) binds and destabilizes mRNA Homo sapiens R-HSA-450408                | 0.007725  |
| Mitochondrial protein import Homo sapiens R-HSA-1268020                              | 0.007725  |
| Assembly of the pre-replicative complex Homo sapiens R-HSA-68867                     | 0.007725  |
| Viral Messenger RNA Synthesis Homo sapiens R-HSA-168325                              | 0.007901  |
| DNA Replication Pre-Initiation Homo sapiens R-HSA-69002                              | 0.008324  |
| M/G1 Transition Homo sapiens R-HSA-68874                                             | 0.008324  |
| HIV Transcription Elongation Homo sapiens R-HSA-167169                               | 0.008571  |
| Tat-mediated elongation of the HIV-1 transcript Homo sapiens R-HSA-167246            | 0.008571  |
| Formation of HIV-1 elongation complex containing HIV-1 Tat Homo sapiens R-HSA-167200 | 0.008571  |
| Signaling by FGFR2 in disease Homo sapiens R-HSA-5655253                             | 0.008571  |
| DNA Repair Homo sapiens R-HSA-73894                                                  | 0.00858   |
| mTORC1-mediated signalling Homo sapiens R-HSA-166208                                 | 0.008637  |
| Oncogene Induced Senescence Homo sapiens R-HSA-2559585                               | 0.008637  |

|                                                                                                        |          |
|--------------------------------------------------------------------------------------------------------|----------|
| Formation of HIV elongation complex in the absence of HIV Tat Homo sapiens R-HSA-167152                | 0.008637 |
| RNA Polymerase II Transcription Elongation Homo sapiens R-HSA-75955                                    | 0.008637 |
| Formation of RNA Pol II elongation complex Homo sapiens R-HSA-112382                                   | 0.008637 |
| RNA Polymerase II HIV Promoter Escape Homo sapiens R-HSA-167162                                        | 0.008637 |
| RNA Polymerase II Promoter Escape Homo sapiens R-HSA-73776                                             | 0.008637 |
| RNA Polymerase II Transcription Initiation And Promoter Clearance Homo sapiens R-HSA-76042             | 0.008637 |
| RNA Polymerase II Transcription Initiation Homo sapiens R-HSA-75953                                    | 0.008637 |
| RNA Polymerase II Transcription Pre-Initiation And Promoter Opening Homo sapiens R-HSA-73779           | 0.008637 |
| HIV Transcription Initiation Homo sapiens R-HSA-167161                                                 | 0.008637 |
| Switching of origins to a post-replicative state Homo sapiens R-HSA-69052                              | 0.008637 |
| Orc1 removal from chromatin Homo sapiens R-HSA-68949                                                   | 0.008637 |
| Regulation of mRNA stability by proteins that bind AU-rich elements Homo sapiens R-HSA-450531          | 0.01001  |
| Removal of licensing factors from origins Homo sapiens R-HSA-69300                                     | 0.0102   |
| RHO GTPase Effectors Homo sapiens R-HSA-195258                                                         | 0.0102   |
| Early Phase of HIV Life Cycle Homo sapiens R-HSA-162594                                                | 0.01075  |
| Purine metabolism Homo sapiens R-HSA-73847                                                             | 0.01075  |
| SCF(Skp2)-mediated degradation of p27/p21 Homo sapiens R-HSA-187577                                    | 0.01075  |
| Sema4D induced cell migration and growth-cone collapse Homo sapiens R-HSA-416572                       | 0.01233  |
| Regulation of DNA replication Homo sapiens R-HSA-69304                                                 | 0.01308  |
| PCP/CE pathway Homo sapiens R-HSA-4086400                                                              | 0.01439  |
| Signaling by FGFR in disease Homo sapiens R-HSA-1226099                                                | 0.01597  |
| Spry regulation of FGF signaling Homo sapiens R-HSA-1295596                                            | 0.01725  |
| RHO GTPases activate CIT Homo sapiens R-HSA-5625900                                                    | 0.01725  |
| TGF-beta receptor signaling in EMT (epithelial to mesenchymal transition) Homo sapiens R-HSA-2173791   | 0.01725  |
| DNA Damage Recognition in GG-NER Homo sapiens R-HSA-5696394                                            | 0.01794  |
| Cellular responses to stress Homo sapiens R-HSA-2262752                                                | 0.01794  |
| RHO GTPases Activate ROCKs Homo sapiens R-HSA-5627117                                                  | 0.02138  |
| Global Genome Nucleotide Excision Repair (GG-NER) Homo sapiens R-HSA-5696399                           | 0.02207  |
| Toll Like Receptor 10 (TLR10) Cascade Homo sapiens R-HSA-168142                                        | 0.02207  |
| Toll Like Receptor 5 (TLR5) Cascade Homo sapiens R-HSA-168176                                          | 0.02207  |
| MyD88 cascade initiated on plasma membrane Homo sapiens R-HSA-975871                                   | 0.02207  |
| RHO GTPases Activate Formins Homo sapiens R-HSA-5663220                                                | 0.02243  |
| Cyclin E associated events during G1/S transition Homo sapiens R-HSA-69202                             | 0.02343  |
| TRAF6 mediated induction of NFkB and MAP kinases upon TLR7/8 or 9 activation Homo sapiens R-HSA-975138 | 0.02343  |
| Displacement of DNA glycosylase by APEX1 Homo sapiens R-HSA-110357                                     | 0.02388  |
| Integration of provirus Homo sapiens R-HSA-162592                                                      | 0.02388  |
| Cell Cycle Homo sapiens R-HSA-1640170                                                                  | 0.02464  |
| Cyclin A:Cdk2-associated events at S phase entry Homo sapiens R-HSA-69656                              | 0.02491  |
| Cell Cycle, Mitotic Homo sapiens R-HSA-69278                                                           | 0.02526  |
| MyD88 dependent cascade initiated on endosome Homo sapiens R-HSA-975155                                | 0.02613  |
| Toll Like Receptor 7/8 (TLR7/8) Cascade Homo sapiens R-HSA-168181                                      | 0.02613  |
| Transcriptional regulation of pluripotent stem cells Homo sapiens R-HSA-452723                         | 0.0267   |
| Termination of translesion DNA synthesis Homo sapiens R-HSA-5656169                                    | 0.0284   |
| Formation of Incision Complex in GG-NER Homo sapiens R-HSA-5696395                                     | 0.02966  |
| Purine catabolism Homo sapiens R-HSA-74259                                                             | 0.03111  |
| Toll Like Receptor 9 (TLR9) Cascade Homo sapiens R-HSA-168138                                          | 0.03178  |
| CDT1 association with the CDC6:ORC:origin complex Homo sapiens R-HSA-68827                             | 0.03271  |
| Processing of Capped Intron-Containing Pre-mRNA Homo sapiens R-HSA-72203                               | 0.03284  |
| DNA strand elongation Homo sapiens R-HSA-69190                                                         | 0.03601  |
| Glycolysis Homo sapiens R-HSA-70171                                                                    | 0.03601  |
| Oxidative Stress Induced Senescence Homo sapiens R-HSA-2559580                                         | 0.03825  |
| MyD88:Mal cascade initiated on plasma membrane Homo sapiens R-HSA-166058                               | 0.03999  |
| Toll Like Receptor TLR1:TLR2 Cascade Homo sapiens R-HSA-168179                                         | 0.03999  |
| Toll Like Receptor TLR6:TLR2 Cascade Homo sapiens R-HSA-168188                                         | 0.03999  |

|                                                                                               |                     |
|-----------------------------------------------------------------------------------------------|---------------------|
| Toll Like Receptor 2 (TLR2) Cascade Homo sapiens R-HSA-181438                                 | 0.03999             |
| TP53 Regulates Transcription of DNA Repair Genes Homo sapiens R-HSA-6796648                   | 0.04068             |
| Beta-catenin independent WNT signaling Homo sapiens R-HSA-3858494                             | 0.04099             |
| Apoptosis Homo sapiens R-HSA-109581                                                           | 0.04275             |
| Late Phase of HIV Life Cycle Homo sapiens R-HSA-162599                                        | 0.04443             |
| Post-chaperonin tubulin folding pathway Homo sapiens R-HSA-389977                             | 0.04502             |
| Activated TLR4 signalling Homo sapiens R-HSA-166054                                           | 0.04754             |
| Unwinding of DNA Homo sapiens R-HSA-176974                                                    | 0.04799             |
| Programmed Cell Death Homo sapiens R-HSA-5357801                                              | 0.04799             |
| Base Excision Repair Homo sapiens R-HSA-73884                                                 | 0.04818             |
| Resolution of Abasic Sites (AP sites) Homo sapiens R-HSA-73933                                | 0.04818             |
| Regulation of activated PAK-2p34 by proteasome mediated degradation Homo sapiens R-HSA-211733 | 0.04899             |
| RNA Polymerase II Pre-transcription Events Homo sapiens R-HSA-674695                          | 0.04923             |
|                                                                                               |                     |
|                                                                                               |                     |
| <b>MSigDB Hallmark 2020</b>                                                                   | <b>adj. P-value</b> |
| Myc Targets V1                                                                                | 1.53E-19            |
| Oxidative Phosphorylation                                                                     | 5.35E-14            |
| Reactive Oxygen Species Pathway                                                               | 0.000002431         |
| DNA Repair                                                                                    | 0.0001292           |
| mTORC1 Signaling                                                                              | 0.001529            |
| Fatty Acid Metabolism                                                                         | 0.002001            |
| E2F Targets                                                                                   | 0.02136             |
| TGF-beta Signaling                                                                            | 0.02141             |
| Myc Targets V2                                                                                | 0.02848             |
| Apoptosis                                                                                     | 0.03245             |
| Adipogenesis                                                                                  | 0.03245             |
|                                                                                               |                     |
|                                                                                               |                     |
| <b>Elsevier Pathway Collection</b>                                                            | <b>adj. P-value</b> |
| Glycolysis Activation in Cancer (Warburg Effect)                                              | 0.01152             |
|                                                                                               |                     |
|                                                                                               |                     |
| <b>KEGG 2021 Human</b>                                                                        | <b>adj. P-value</b> |
| Ribosome                                                                                      | 4.90E-61            |
| Coronavirus disease                                                                           | 2.92E-41            |
| Neutrophil extracellular trap formation                                                       | 1.20E-17            |
| Systemic lupus erythematosus                                                                  | 1.37E-16            |
| Alcoholism                                                                                    | 6.58E-14            |
| Parkinson disease                                                                             | 3.81E-12            |
| Huntington disease                                                                            | 1.22E-10            |
| Amyotrophic lateral sclerosis                                                                 | 2.29E-08            |
| Diabetic cardiomyopathy                                                                       | 5.08E-08            |
| Prion disease                                                                                 | 1.97E-07            |
| Oxidative phosphorylation                                                                     | 4.03E-07            |
| Thermogenesis                                                                                 | 7.54E-07            |
| Pathways of neurodegeneration                                                                 | 0.000001119         |
| Viral carcinogenesis                                                                          | 0.000008901         |
| Alzheimer disease                                                                             | 0.00004432          |
| Necroptosis                                                                                   | 0.0003722           |
| Non-alcoholic fatty liver disease                                                             | 0.0008775           |
| Pentose phosphate pathway                                                                     | 0.001212            |
| Salmonella infection                                                                          | 0.001891            |
| Base excision repair                                                                          | 0.002079            |

|                                                                                                                       |                     |
|-----------------------------------------------------------------------------------------------------------------------|---------------------|
| DNA replication                                                                                                       | 0.003515            |
| Shigellosis                                                                                                           | 0.003667            |
| RNA polymerase                                                                                                        | 0.008965            |
| Cysteine and methionine metabolism                                                                                    | 0.02358             |
| Pathogenic Escherichia coli infection                                                                                 | 0.02656             |
| Glycolysis / Gluconeogenesis                                                                                          | 0.02913             |
| Regulation of actin cytoskeleton                                                                                      | 0.02913             |
| Hepatocellular carcinoma                                                                                              | 0.03392             |
| Glyoxylate and dicarboxylate metabolism                                                                               | 0.03854             |
| Glutathione metabolism                                                                                                | 0.04003             |
|                                                                                                                       |                     |
|                                                                                                                       |                     |
| <b>WikiPathway 2021 Human</b>                                                                                         | <b>adj. P-value</b> |
| Cytoplasmic Ribosomal Proteins WP477                                                                                  | 2.56E-73            |
| Electron Transport Chain (OXPHOS system in mitochondria) WP111                                                        | 3.69E-09            |
| Metabolic reprogramming in colon cancer WP4290                                                                        | 1.96E-08            |
| Translation Factors WP107                                                                                             | 2.80E-07            |
| VEGFA-VEGFR2 Signaling Pathway WP3888                                                                                 | 2.80E-07            |
| Cori Cycle WP1946                                                                                                     | 0.00008174          |
| Computational Model of Aerobic Glycolysis WP4629                                                                      | 0.0001041           |
| Glycolysis in senescence WP5049                                                                                       | 0.001253            |
| Glycolysis and Gluconeogenesis WP534                                                                                  | 0.001384            |
| Pentose Phosphate Metabolism WP134                                                                                    | 0.001906            |
| Oxidative phosphorylation WP623                                                                                       | 0.001906            |
| Pyrimidine metabolism WP4022                                                                                          | 0.001906            |
| Nonalcoholic fatty liver disease WP4396                                                                               | 0.001906            |
| Base Excision Repair WP4752                                                                                           | 0.00302             |
| Pathogenic Escherichia coli infection WP2272                                                                          | 0.004293            |
| Mitochondrial complex I assembly model OXPHOS system WP4324                                                           | 0.004641            |
| Leptin signaling pathway WP2034                                                                                       | 0.01051             |
| Pathways in clear cell renal cell carcinoma WP4018                                                                    | 0.02421             |
| Retinoblastoma gene in cancer WP2446                                                                                  | 0.02747             |
| HIF1A and PPARG regulation of glycolysis WP2456                                                                       | 0.04516             |
| Mitochondrial complex III assembly WP4921                                                                             | 0.04516             |
|                                                                                                                       |                     |
|                                                                                                                       |                     |
| <b>BioPlanet 2019</b>                                                                                                 | <b>adj. P-value</b> |
| Cytoplasmic ribosomal proteins                                                                                        | 5.66E-71            |
| Influenza viral RNA transcription and replication                                                                     | 5.66E-71            |
| Translation                                                                                                           | 1.03E-68            |
| Influenza infection                                                                                                   | 1.44E-65            |
| Cap-dependent translation initiation                                                                                  | 2.89E-47            |
| Protein metabolism                                                                                                    | 9.97E-45            |
| Activation of mRNA upon binding of the cap-binding complex and eIFs, and subsequent binding to 43S                    | 9.73E-31            |
| Disease                                                                                                               | 1.81E-27            |
| Gene expression                                                                                                       | 7.44E-22            |
| Huntington's disease                                                                                                  | 7.86E-08            |
| T cell receptor regulation of apoptosis                                                                               | 1.33E-07            |
| Parkinson's disease                                                                                                   | 1.83E-07            |
| Tricarboxylic acid (TCA) cycle and respiratory electron transport                                                     | 6.54E-07            |
| Translation factors                                                                                                   | 0.000001318         |
| Respiratory electron transport, ATP biosynthesis by chemiosmotic coupling, and heat production by uncoupling proteins | 0.000002071         |
| Electron transport chain                                                                                              | 0.000002782         |

|                                                                           |            |
|---------------------------------------------------------------------------|------------|
| Viral messenger RNA biosynthesis                                          | 0.00001282 |
| HIV infection                                                             | 0.0002417  |
| Nucleotide excision repair                                                | 0.0003444  |
| Gluconeogenesis                                                           | 0.0005393  |
| Alzheimer's disease                                                       | 0.0006635  |
| Messenger RNA splicing: minor pathway                                     | 0.000719   |
| Regulatory RNA pathways                                                   | 0.0009311  |
| Pentose phosphate pathway                                                 | 0.001484   |
| Oxidative phosphorylation                                                 | 0.001484   |
| Nucleotide metabolism                                                     | 0.001602   |
| Dual incision reaction in TC-NER                                          | 0.001711   |
| Messenger RNA capping                                                     | 0.001711   |
| S phase                                                                   | 0.00195    |
| Pyrimidine metabolism                                                     | 0.002272   |
| DNA replication                                                           | 0.002421   |
| DNA repair                                                                | 0.003534   |
| Destabilization of mRNA by AUF1 (hnRNP D0)                                | 0.003693   |
| Mitotic G1-G1/S phases                                                    | 0.003693   |
| Pathogenic Escherichia coli infection                                     | 0.005573   |
| Base excision repair                                                      | 0.00604    |
| HIV factor interactions with host                                         | 0.006448   |
| Purine metabolism                                                         | 0.008818   |
| Glycolysis and gluconeogenesis                                            | 0.009165   |
| HIV life cycle                                                            | 0.009165   |
| APOBEC3G-mediated resistance to HIV-1 infection                           | 0.01018    |
| Mammalian target of rapamycin complex 1 (mTORC1)-mediated signaling       | 0.01018    |
| HIV-1 transcription initiation                                            | 0.01018    |
| RNA polymerase                                                            | 0.01114    |
| Sema4D in semaphorin signaling                                            | 0.01114    |
| Mitochondrial protein import                                              | 0.01132    |
| HIV life cycle early phase                                                | 0.01901    |
| Myc active pathway                                                        | 0.02075    |
| mRNA stability regulation by proteins that bind AU-rich elements          | 0.02226    |
| Signaling events mediated by PRL                                          | 0.02311    |
| DNA replication pre-Initiation                                            | 0.02554    |
| Glucose metabolism                                                        | 0.02823    |
| Leptin signaling pathway                                                  | 0.02823    |
| Licensing factor removal from origins                                     | 0.02823    |
| Capped intron-containing pre-mRNA processing                              | 0.02878    |
| Sprouty regulation of FGF signaling                                       | 0.0359     |
| TGF-beta receptor signaling in EMT (epithelial to mesenchymal transition) | 0.0359     |
| Ras signaling pathway                                                     | 0.0359     |
| Integration of provirus                                                   | 0.03613    |
| S6K1 signaling                                                            | 0.03613    |
| Spliceosome                                                               | 0.03742    |
| Glycolysis                                                                | 0.0396     |
| Eukaryotic protein translation                                            | 0.04197    |

**Supplementary Table S8.** Modules identified in the network by WGCNA functions and their relative size (number of genes).

| Module       | Genes |
|--------------|-------|
| black        | 233   |
| blue         | 4073  |
| brown        | 437   |
| cyan         | 120   |
| green        | 282   |
| greenyellow  | 138   |
| grey60       | 98    |
| lightcyan    | 115   |
| lightgreen   | 93    |
| lightyellow  | 41    |
| magenta      | 184   |
| midnightblue | 115   |
| pink         | 231   |
| purple       | 155   |
| red          | 257   |
| salmon       | 127   |
| tan          | 131   |
| turquoise    | 5018  |
| yellow       | 361   |

**Supplementary Table S9.** This table is already filtered to report piRNAs predicted to be strongly associated with breast cancer according to the iPiDi-PUL tool. The top part of the table shows the piRNAs that were down regulated and the bottom part shows the up regulated in EVs after our eribulin treatments.

| piRNA Name    | log <sub>2</sub> (FoldChange) | iPiDi-PUL score |
|---------------|-------------------------------|-----------------|
| piR-hsa-12789 | -7.417                        | 0.84            |
| piR-hsa-25046 | -6.671                        | 0.8475          |
| piR-hsa-1338  | 1.454                         | 0.8975          |
| piR-hsa-24000 | 1.554                         | 0.8425          |
| piR-hsa-963   | 1.988                         | 0.815           |
| piR-hsa-26039 | 2.325                         | 0.885           |



**Supplementary Table S10.** Here we report the tRNA fragments for which we have both expression data derived from this study and those derived from the tRFtarget 2.0 database. The last five columns report the values in terms of log2FC with adjusted p-values. n.s.: not significant.

| Name        | Eribulin-treated EVs<br>vs control | Tumor vs<br>Normal   | LumA vs<br>Normal    | Her2 vs<br>Normal    | LumB vs<br>Normal    | Triple-<br>Negative vs<br>Normal |
|-------------|------------------------------------|----------------------|----------------------|----------------------|----------------------|----------------------------------|
| tRFdb-5026a | 1.759                              | 0.803<br>(p=1.2E-04) | 0.940<br>(p=6.8E-06) | 0.781<br>(p=9.5E-03) | 1.286<br>(p=2.6E-08) | n.s.                             |
| tRFdb-5020a | 1.023                              | 0.327<br>(p=4.9E-02) | 0.489<br>(p=9.9E-03) | 0.807<br>(p=2.2E-03) | 0.642<br>(p=2.4E-03) | n.s.                             |
| tRFdb-3004a | -4.73                              | 0.557<br>(p=3.6E-04) | 0.604<br>(p=1.4E-04) | 1.007<br>(p=3.2E-06) | 0.693<br>(p=9.4E-05) | 0.871<br>(p=8.5E-07)             |
| ts-112      | -4.833                             | n.s.                 | 0.434<br>(p=5.8E-03) | n.s.                 | 0.403<br>(p=2.1E-02) | n.s.                             |
